# Supplementary material for: Computational insights into Ir(iii)-catalyzed allylic C–H amination of terminal alkenes: mechanism, regioselectivity, and catalytic activity
Source: Royal Society of Chemistry journal article supplement (doi:10.1039/d1ra03842g), 2021-01-01
Supplement: d1ra03842g1.pdf [file d1ra03842g1.pdf]

***Electronic Supplementary Information***

**Computational Insights into Ir(III)-Catalyzed Allylic C–H Amination of Terminal Alkene: Mechanism, Regioselectivity, and Catalytic Activity**

Deng Pan,<sup>a</sup> Gen Luo,<sup>b,\*</sup> Yang Yu,<sup>a</sup> Jimin Yang,<sup>a</sup> and Yi Luo<sup>a,c,\*</sup>

<sup>a</sup>*State Key Laboratory of Fine Chemicals, School of Chemical Engineering, Dalian University of Technology, Dalian 116024, China.*

<sup>b</sup>*Institutes of Physical Science and Information Technology, Anhui University, Hefei 230601, China*

<sup>c</sup>*PetroChina Petrochemical Research Institute, Beijing, 102206, China*

E-mails: luogen@ahu.edu.cn (G.L.); luoyi@dlut.edu.cn (Y.L.)

**Table S1.** Free energy differences (kcal mol<sup>-1</sup>) of several potential Co(III) active species between singlet, triplet, and quintet states (the corresponding singlet states are taken as reference points).

|                                         | $G(\text{singlet})$ | $G(\text{triplet})$ | $G(\text{quintet})$ |
|-----------------------------------------|---------------------|---------------------|---------------------|
| [Cp*CoCl <sub>2</sub> ] <sub>2</sub>    | 0.0                 | -5.1                | 2.0                 |
| Cp*Co(OAc) <sub>2</sub>                 | 0.0                 | -5.8                | 0.1                 |
| [Cp*Co(OAc)] <sup>+</sup>               | 0.0                 | -2.3                | 7.3                 |
| Cp*Co(OAc)(NTf <sub>2</sub> )           | 0.0                 | -1.3                | 7.3                 |
| [Cp*Co(NTf <sub>2</sub> )] <sup>+</sup> | 0.0                 | -2.4                | 9.0                 |

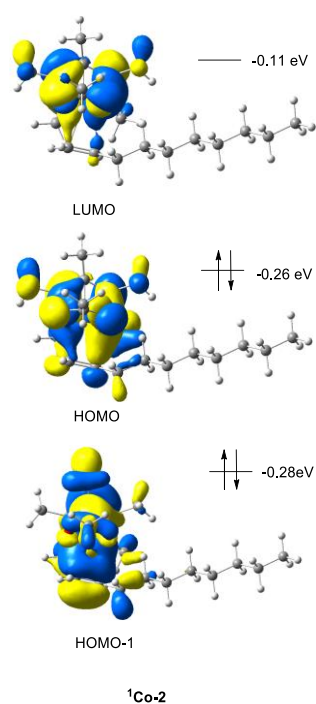

**Fig. S1** Frontier molecular orbital analysis of alkene-coordinating  $\pi$ -complexes <sup>1</sup>Co-2.

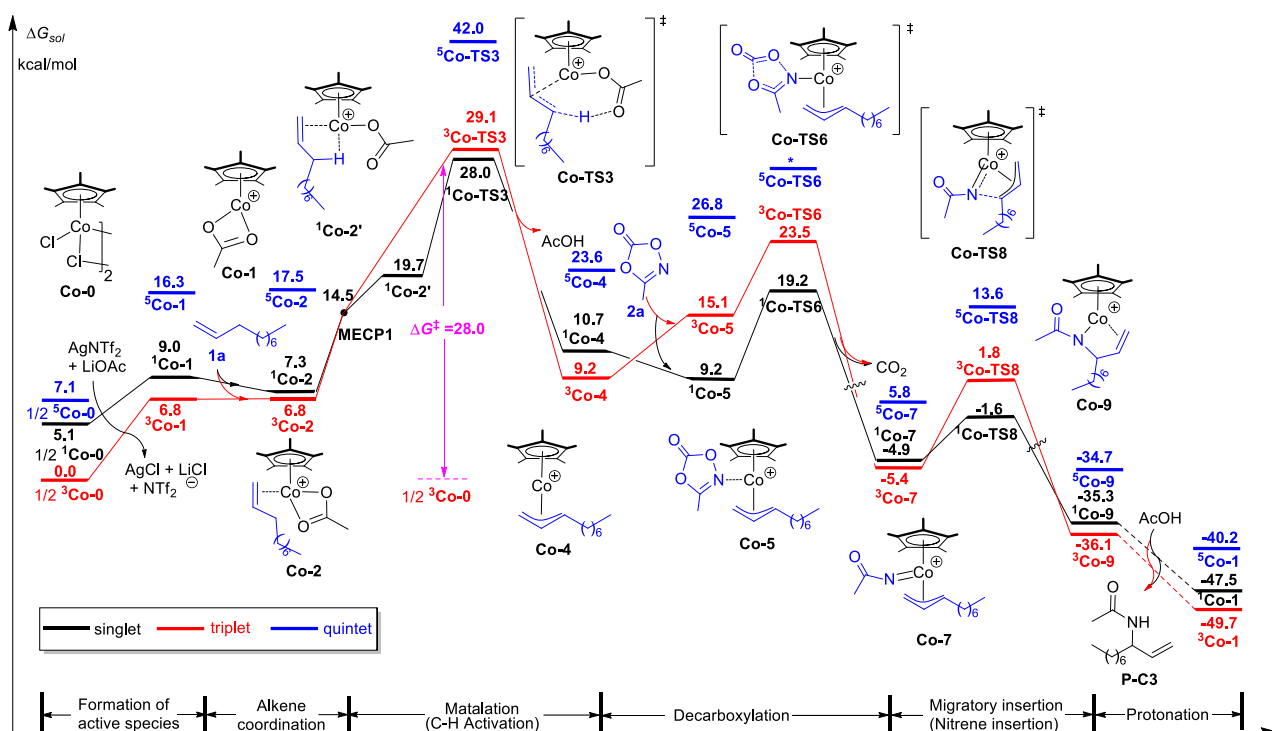

**Fig. S2** Calculated free energy profiles for intermolecular allylic C–H amidation of 1-decene by the Co catalyst.

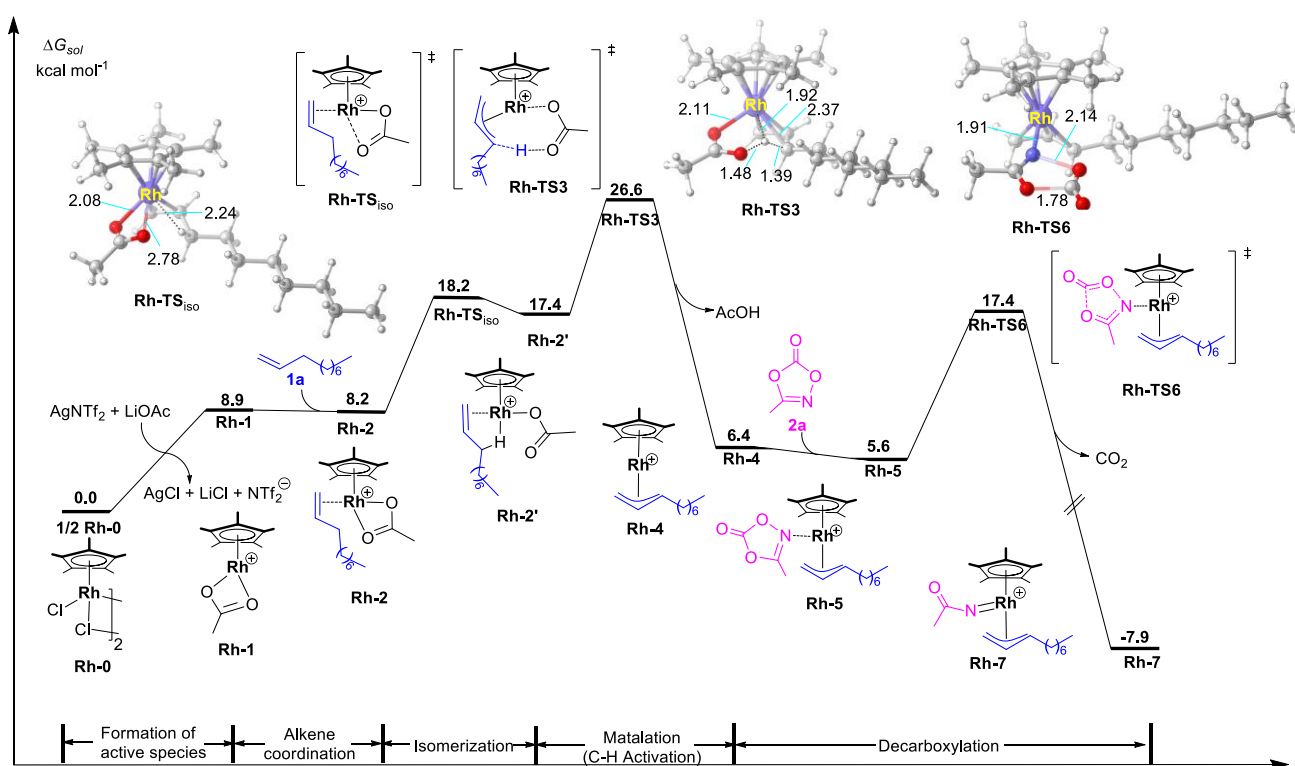

**Fig. S3** Calculated free energy profiles for allylic C–H activation by the Rh(III) catalyst. Bond distances shown in the structures are given in angstroms.

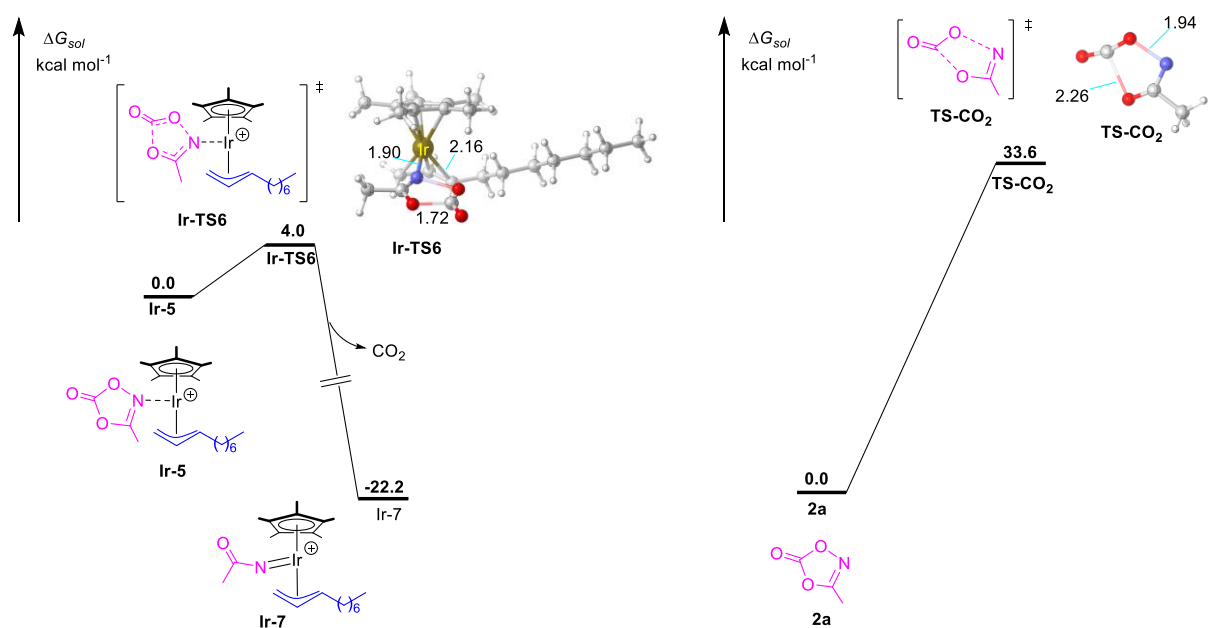

**Fig. S4** Calculated free energy profiles for CO<sub>2</sub> extrusion by the Ir(III) catalyst and the uncoordinated organic molecule. Bond distances shown in the structures are given in angstroms.

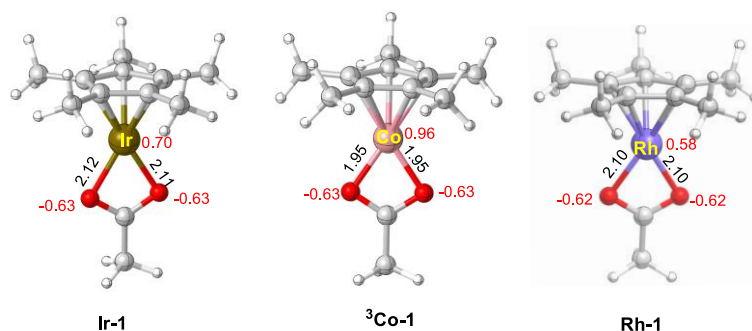

**Fig. S5** Optimized structures of **Ir-1**, **Rh-1** and **<sup>3</sup>Co-1**. Bond distances shown in the structures are given in angstroms (Å). Red number represents the NPA charge.

### Cartesian coordinates for all of the stationary points

#### [Cp\*IrCl<sub>2</sub>]<sub>2</sub>

|    |             |             |             |
|----|-------------|-------------|-------------|
| Ir | -1.84986100 | 0.21493800  | -0.00004900 |
| Ir | 1.84985800  | -0.21493200 | 0.00005300  |
| Cl | 0.00004900  | 0.00009600  | -1.68234700 |
| Cl | -0.00004900 | -0.00008600 | 1.68235500  |
| Cl | -1.50062100 | 2.61062800  | 0.00006700  |
| Cl | 1.50060700  | -2.61062200 | -0.00009800 |
| C  | 2.83286400  | 1.59652100  | 0.71551800  |
| C  | 2.83285300  | 1.59665500  | -0.71509100 |
| C  | 3.54560300  | 0.40109600  | -1.17278800 |

|   |             |             |             |
|---|-------------|-------------|-------------|
| C | 3.54561300  | 0.40087500  | 1.17298300  |
| C | 4.01542500  | -0.30635500 | 0.00002600  |
| C | -3.54556900 | -0.40116300 | 1.17281400  |
| C | -4.01542800 | 0.30634000  | 0.00004700  |
| C | -3.54564000 | -0.40083100 | -1.17295700 |
| C | -2.83281700 | -1.59669300 | 0.71504100  |
| C | -2.83287100 | -1.59649200 | -0.71556800 |
| C | -2.19104100 | -2.63501900 | -1.58214500 |
| H | -1.24177800 | -2.96358800 | -1.15170000 |
| H | -2.85683200 | -3.50042000 | -1.68706700 |
| H | -1.97667500 | -2.23907000 | -2.57552200 |
| C | -2.19093200 | -2.63546200 | 1.58128700  |
| H | -2.85669800 | -3.50090900 | 1.68598900  |
| H | -1.24167600 | -2.96388400 | 1.15071200  |
| H | -1.97652800 | -2.23979800 | 2.57476900  |
| C | -3.81878600 | -0.04140700 | 2.60028500  |
| H | -4.71018200 | -0.56489100 | 2.96748500  |
| H | -2.97386800 | -0.31606200 | 3.23539800  |
| H | -3.98023900 | 1.03272300  | 2.70787600  |
| C | -4.82173400 | 1.56616300  | 0.00017800  |
| H | -5.89155600 | 1.32500000  | -0.00068300 |
| H | -4.59712700 | 2.17253900  | 0.87861200  |
| H | -4.59589100 | 2.17345600  | -0.87730900 |
| C | -3.81903000 | -0.04066700 | -2.60029100 |
| H | -4.71049300 | -0.56401800 | -2.96752100 |
| H | -3.98047600 | 1.03349800  | -2.70754700 |
| H | -2.97421000 | -0.31516700 | -3.23560200 |
| C | 2.19102000  | 2.63509300  | 1.58203100  |
| H | 2.85681800  | 3.50049000  | 1.68694200  |
| H | 1.24177500  | 2.96365800  | 1.15154200  |
| H | 1.97661400  | 2.23918800  | 2.57541700  |
| C | 3.81894200  | 0.04078200  | 2.60034700  |
| H | 4.71038400  | 0.56415700  | 2.96759200  |
| H | 2.97409000  | 0.31530800  | 3.23560400  |
| H | 3.98038700  | -1.03337700 | 2.70766700  |
| C | 2.19100000  | 2.63538900  | -1.58140400 |
| H | 1.24173800  | 2.96384300  | -1.15086600 |
| H | 2.85677900  | 3.50082300  | -1.68612900 |
| H | 1.97661800  | 2.23968100  | -2.57487200 |
| C | 3.81887400  | 0.04126400  | -2.60022900 |
| H | 2.97399200  | 0.31590700  | -3.23539700 |
| H | 4.71029900  | 0.56470900  | -2.96741600 |
| H | 3.98031000  | -1.03287500 | -2.70775700 |
| C | 4.82171800  | -1.56618600 | -0.00006800 |

|   |            |             |             |
|---|------------|-------------|-------------|
| H | 4.59624600 | -2.17322800 | 0.87768600  |
| H | 4.59672900 | -2.17280900 | -0.87823500 |
| H | 5.89154400 | -1.32503300 | 0.00027700  |

**LiOAc**

|    |             |             |             |
|----|-------------|-------------|-------------|
| C  | -1.56142000 | 0.01201600  | -0.00000300 |
| H  | -1.95059700 | 1.03027000  | 0.00159300  |
| H  | -1.92186900 | -0.53071400 | 0.87882300  |
| H  | -1.92170000 | -0.52767300 | -0.88079600 |
| C  | -0.04644700 | 0.00774600  | 0.00007000  |
| O  | 0.56491100  | -1.11425500 | 0.00002300  |
| O  | 0.59300900  | 1.11202300  | 0.00002000  |
| Li | 2.05933800  | -0.02419800 | -0.00012100 |

**AgNTf<sub>2</sub>**

|    |             |             |             |
|----|-------------|-------------|-------------|
| N  | -0.00009500 | 0.07740000  | -0.00029800 |
| S  | -1.18393400 | -0.67758800 | -0.89021000 |
| S  | 1.18352600  | -0.67766200 | 0.88996600  |
| O  | -1.66916400 | 0.35018400  | -1.81858500 |
| O  | -0.83027000 | -2.02002500 | -1.32806800 |
| O  | 1.66857700  | 0.35016200  | 1.81844400  |
| O  | 0.82973400  | -2.02005000 | 1.32784200  |
| C  | 2.52855300  | -0.83749500 | -0.40185700 |
| C  | -2.52850800 | -0.83733400 | 0.40196800  |
| F  | 2.83728200  | 0.39259700  | -0.85156200 |
| F  | 3.60896500  | -1.38676400 | 0.14769600  |
| F  | 2.10552500  | -1.57962400 | -1.41949800 |
| F  | -3.60963200 | -1.38537400 | -0.14722700 |
| F  | -2.10550600 | -1.58023900 | 1.41902800  |
| F  | -2.83600300 | 0.39293700  | 0.85253700  |
| Ag | 0.00021800  | 2.21760000  | -0.00001100 |

**OAc<sup>-</sup>**

|   |             |             |             |
|---|-------------|-------------|-------------|
| C | -1.35245900 | -0.05349100 | -0.00000800 |
| H | -1.72216800 | -1.08287100 | -0.00023200 |
| H | -1.73350400 | 0.47464900  | -0.88150800 |
| H | -1.73361600 | 0.47429600  | 0.88166000  |
| C | 0.21197400  | 0.00139500  | 0.00006300  |
| O | 0.69727900  | 1.16004500  | -0.00001600 |
| O | 0.80674500  | -1.10423200 | -0.00001500 |

**NTf<sub>2</sub><sup>-</sup>**

|   |             |             |            |
|---|-------------|-------------|------------|
| N | -0.00003400 | -0.00027400 | 0.83084100 |
| S | 1.13972100  | -0.86824900 | 0.08969700 |

|   |             |             |             |
|---|-------------|-------------|-------------|
| S | -1.13958500 | 0.86805500  | 0.08970600  |
| O | 1.64382200  | -1.86233100 | 1.03431500  |
| O | 0.88339800  | -1.26765500 | -1.29287900 |
| O | -1.64339100 | 1.86226000  | 1.03433400  |
| O | -0.88309100 | 1.26750000  | -1.29281200 |
| C | -2.56417800 | -0.37728400 | -0.03969100 |
| C | 2.56400800  | 0.37742500  | -0.03970500 |
| F | -2.96131500 | -0.79070200 | 1.17354900  |
| F | -3.62002700 | 0.19947500  | -0.64611500 |
| F | -2.20974400 | -1.45253700 | -0.75373700 |
| F | 3.62004700  | -0.19926100 | -0.64575000 |
| F | 2.20946200  | 1.45243300  | -0.75409500 |
| F | 2.96081800  | 0.79125700  | 1.17352500  |

### LiNTf<sub>2</sub>

|    |             |             |             |
|----|-------------|-------------|-------------|
| N  | -0.02478100 | 0.27297200  | -0.63265300 |
| S  | 1.30469200  | 1.04079800  | -0.04437200 |
| S  | -1.08438500 | -0.58787600 | 0.26379000  |
| O  | 1.85968800  | 1.82648900  | -1.13884000 |
| O  | -1.14545600 | -1.88193300 | -0.49998400 |
| O  | 1.18307300  | 1.55737300  | 1.31028600  |
| O  | -0.93816900 | -0.62341600 | 1.71084300  |
| C  | -2.70439300 | 0.27094400  | -0.12506600 |
| C  | 2.44079400  | -0.46025500 | 0.06682800  |
| F  | -2.65302200 | 1.51829000  | 0.32943600  |
| F  | -2.89740000 | 0.27587300  | -1.44562300 |
| F  | -3.69137100 | -0.39434500 | 0.47039300  |
| F  | 2.11153700  | -1.24443700 | 1.08578500  |
| F  | 3.71567500  | -0.12765200 | 0.12351700  |
| F  | 2.26225800  | -1.22804100 | -1.09150300 |
| Li | 0.30932500  | -1.41566200 | -1.67972600 |

### LiCl

|    |            |            |             |
|----|------------|------------|-------------|
| Li | 0.00000000 | 0.00000000 | -1.74664400 |
| Cl | 0.00000000 | 0.00000000 | 0.30823100  |

### AgOAc

|   |             |             |             |
|---|-------------|-------------|-------------|
| C | -3.02904100 | 0.00177600  | 0.00003700  |
| H | -3.42507100 | 1.01697500  | 0.00110600  |
| H | -3.38319100 | -0.54116400 | 0.88069800  |
| H | -3.38331900 | -0.53919500 | -0.88177800 |
| C | -1.50938500 | 0.00836000  | -0.00006100 |
| O | -0.91291300 | -1.11419600 | -0.00000200 |
| O | -0.90280800 | 1.12395900  | 0.00000100  |

|    |            |             |            |
|----|------------|-------------|------------|
| Ag | 1.10527500 | -0.00160700 | 0.00000300 |
|----|------------|-------------|------------|

**AgCl**

|    |            |            |             |
|----|------------|------------|-------------|
| Cl | 0.00000000 | 0.00000000 | -1.70803400 |
| Ag | 0.00000000 | 0.00000000 | 0.61779900  |

**Cp\*Ir(OAc)<sub>2</sub>**

|    |             |             |             |
|----|-------------|-------------|-------------|
| Ir | 0.03543100  | -0.18378000 | -0.07128300 |
| C  | 1.24226700  | 1.19417600  | 1.08433900  |
| C  | 1.14914200  | 1.68754800  | -0.26791100 |
| C  | 1.68519500  | 0.68375800  | -1.15396100 |
| C  | 2.18450000  | -0.42003200 | -0.33249000 |
| C  | 1.90830900  | -0.10800000 | 1.03564800  |
| C  | 0.83621800  | 1.93576200  | 2.31945000  |
| H  | 1.60096000  | 2.67456600  | 2.59046800  |
| H  | 0.71198800  | 1.25138500  | 3.16164700  |
| H  | -0.11756100 | 2.43647400  | 2.15099500  |
| C  | 0.59074500  | 3.01585200  | -0.67337400 |
| H  | 1.37189400  | 3.78201700  | -0.59525700 |
| H  | -0.24880600 | 3.28594300  | -0.03326300 |
| H  | 0.23775300  | 2.99587900  | -1.70666900 |
| C  | 1.82073200  | 0.78370300  | -2.64238000 |
| H  | 2.80212500  | 1.19240200  | -2.91383300 |
| H  | 1.05166400  | 1.43334000  | -3.06452100 |
| H  | 1.72048700  | -0.19865400 | -3.10985500 |
| C  | 2.85518600  | -1.64794000 | -0.86752000 |
| H  | 3.90146000  | -1.43514000 | -1.11790100 |
| H  | 2.35241800  | -2.00095900 | -1.77121900 |
| H  | 2.83705900  | -2.46095200 | -0.13930400 |
| C  | 2.22427400  | -0.94831900 | 2.23447600  |
| H  | 3.11310800  | -0.56199200 | 2.74717200  |
| H  | 2.41316200  | -1.98659500 | 1.95548500  |
| H  | 1.39095900  | -0.93942300 | 2.94097200  |
| O  | -1.14832800 | -1.61248300 | 1.11125600  |
| O  | -0.73188100 | -2.03334200 | -0.98837700 |
| C  | -1.34283400 | -2.34411800 | 0.08553600  |
| C  | -2.29431300 | -3.50409000 | 0.12953200  |
| H  | -3.28748400 | -3.14468700 | -0.15989700 |
| H  | -1.98738700 | -4.27446900 | -0.58016200 |
| H  | -2.35442000 | -3.91035300 | 1.14065200  |
| C  | -3.91649400 | 1.58658800  | -0.49690400 |
| H  | -3.95207100 | 1.55955200  | -1.58916900 |
| H  | -4.32722100 | 2.52565600  | -0.12369500 |
| H  | -4.52674100 | 0.75524500  | -0.12879800 |



|   |             |            |             |
|---|-------------|------------|-------------|
| C | -2.48634700 | 1.40859900 | -0.00316700 |
| O | -2.02018300 | 2.12080900 | 0.88602900  |
| O | -1.87098300 | 0.42888400 | -0.61799500 |

**Cp\*Ir(OAc)(NTf<sub>2</sub>)**

|    |             |             |             |
|----|-------------|-------------|-------------|
| Ir | -1.17137600 | -0.10189900 | 0.10597300  |
| C  | -1.67865800 | 1.20104800  | -1.57533400 |
| C  | -1.86682500 | 1.91324100  | -0.32054700 |
| C  | -2.87079400 | 1.20020100  | 0.43887000  |
| C  | -3.28741800 | 0.03820700  | -0.31367900 |
| C  | -2.53341800 | 0.04528000  | -1.56514200 |
| C  | -0.78920000 | 1.62384300  | -2.70162500 |
| H  | -1.35169700 | 2.26489200  | -3.39125500 |
| H  | -0.40907600 | 0.76091700  | -3.24751400 |
| H  | 0.06899800  | 2.18500700  | -2.33525200 |
| C  | -1.23150900 | 3.21115500  | 0.07282400  |
| H  | -1.89576300 | 4.04739200  | -0.17712900 |
| H  | -0.28602600 | 3.35889500  | -0.44775700 |
| H  | -1.01960500 | 3.23391200  | 1.14251400  |
| C  | -3.34381900 | 1.58940100  | 1.80405800  |
| H  | -4.13404200 | 2.34536400  | 1.72474000  |
| H  | -2.52220800 | 2.00714600  | 2.38960400  |
| H  | -3.74061000 | 0.73028400  | 2.34741700  |
| C  | -4.34597000 | -0.95012900 | 0.07037700  |
| H  | -5.31763300 | -0.66083400 | -0.34751000 |
| H  | -4.44868400 | -1.01418400 | 1.15570400  |
| H  | -4.09975300 | -1.94764000 | -0.30026100 |
| C  | -2.61637200 | -0.98335200 | -2.64942500 |
| H  | -3.32437200 | -0.66313700 | -3.42316100 |
| H  | -2.95116400 | -1.94366600 | -2.25262400 |
| H  | -1.63647600 | -1.13454800 | -3.10582000 |
| O  | -0.81573100 | -2.24592800 | 0.35044300  |
| O  | -0.85454400 | -0.95311000 | 2.09710600  |
| C  | -0.69499700 | -2.12202800 | 1.61708200  |
| C  | -0.36330800 | -3.29763000 | 2.48335700  |
| H  | 0.65406600  | -3.62209600 | 2.25171900  |
| H  | -0.43211100 | -3.02663600 | 3.53701100  |
| H  | -1.04000700 | -4.12523400 | 2.25492100  |
| N  | 0.97528800  | 0.06460900  | 0.00400600  |
| S  | 1.82930500  | -0.73722300 | -1.17998700 |
| S  | 1.80535400  | 0.97157800  | 1.14814100  |
| O  | 0.89536600  | -1.06481700 | -2.25850800 |
| O  | 3.09113400  | -0.05125200 | -1.45248900 |
| O  | 0.78691500  | 1.59315500  | 1.99299000  |

|   |            |             |             |
|---|------------|-------------|-------------|
| O | 2.94408600 | 0.25619200  | 1.71441100  |
| C | 2.55268900 | 2.42807200  | 0.17433100  |
| C | 2.31860700 | -2.41107000 | -0.41703100 |
| F | 1.92520300 | 2.59449700  | -1.00369900 |
| F | 2.36764400 | 3.53249400  | 0.90482100  |
| F | 3.84606400 | 2.24784100  | -0.03293800 |
| F | 1.53333600 | -3.37390100 | -0.89137500 |
| F | 3.58195300 | -2.66710100 | -0.75029100 |
| F | 2.21565800 | -2.37193200 | 0.91636000  |

**[Cp\*Ir(NTf<sub>2</sub>)]<sup>+</sup>**

|    |             |             |             |
|----|-------------|-------------|-------------|
| Ir | 0.96469200  | 0.11960800  | -0.19018500 |
| C  | 2.17917200  | -0.54047700 | 1.47085400  |
| C  | 2.84520600  | 0.58102000  | 0.79835100  |
| C  | 3.14437800  | 0.18869400  | -0.55138400 |
| C  | 2.63596100  | -1.15029300 | -0.73904300 |
| C  | 2.05669800  | -1.61215200 | 0.52228800  |
| C  | 1.74662100  | -0.57605000 | 2.90006600  |
| H  | 2.55745400  | -0.99061600 | 3.51145300  |
| H  | 0.86000700  | -1.19822900 | 3.02696600  |
| H  | 1.52049500  | 0.42393400  | 3.27442900  |
| C  | 3.17762200  | 1.89041800  | 1.43455600  |
| H  | 4.14353800  | 1.80828000  | 1.94801100  |
| H  | 2.42846200  | 2.17538800  | 2.17592400  |
| H  | 3.25462300  | 2.68909900  | 0.69520500  |
| C  | 3.83295700  | 1.02143300  | -1.58754600 |
| H  | 4.91117000  | 0.82724500  | -1.56061400 |
| H  | 3.67660000  | 2.08713700  | -1.41257900 |
| H  | 3.47251000  | 0.78827400  | -2.59112800 |
| C  | 2.71580400  | -1.95542800 | -1.99239100 |
| H  | 3.62489600  | -2.56955100 | -1.96585200 |
| H  | 2.76251000  | -1.32061000 | -2.87846700 |
| H  | 1.86091200  | -2.62754700 | -2.08869300 |
| C  | 1.50936600  | -2.97605200 | 0.79372600  |
| H  | 2.31209500  | -3.61346100 | 1.18296000  |
| H  | 1.11829300  | -3.43830800 | -0.11313700 |
| H  | 0.70611000  | -2.93771300 | 1.52970100  |
| N  | -1.06526300 | 0.00466000  | -0.02499400 |
| S  | -2.13963700 | -0.97924000 | 0.85998300  |
| S  | -1.47866500 | 1.34141100  | -0.92120100 |
| O  | -1.33337700 | -1.61457000 | 1.89339300  |
| O  | -3.35922200 | -0.23505700 | 1.12495000  |
| O  | -0.05440700 | 1.61795600  | -1.41200000 |
| O  | -2.57204400 | 1.25353700  | -1.86078700 |

|   |             |             |             |
|---|-------------|-------------|-------------|
| C | -1.80638200 | 2.74124400  | 0.31966800  |
| C | -2.48409800 | -2.28123200 | -0.45261200 |
| F | -0.92210400 | 2.61580900  | 1.31292200  |
| F | -1.61732900 | 3.88089700  | -0.32275800 |
| F | -3.03624400 | 2.63986800  | 0.77306900  |
| F | -1.31451000 | -2.83317900 | -0.80429500 |
| F | -3.28655000 | -3.19894600 | 0.05693800  |
| F | -3.03534600 | -1.69357400 | -1.50466500 |

**Ir-1**

|    |             |             |             |
|----|-------------|-------------|-------------|
| Ir | -0.30026200 | -0.00442000 | -0.01307700 |
| C  | 1.50347300  | 0.49954200  | -1.10010900 |
| C  | 1.51475700  | -0.93373200 | -0.78111400 |
| C  | 1.49210700  | -1.06618100 | 0.64088300  |
| C  | 1.45513000  | 0.28214200  | 1.20927200  |
| C  | 1.49896300  | 1.24286900  | 0.13027300  |
| C  | 1.53956100  | 1.07307300  | -2.47744200 |
| H  | 2.58370900  | 1.15567900  | -2.80463900 |
| H  | 1.09502400  | 2.06895300  | -2.51031500 |
| H  | 1.01544000  | 0.43481300  | -3.19147200 |
| C  | 1.56961200  | -2.04094100 | -1.78336000 |
| H  | 2.61264700  | -2.22629900 | -2.06682500 |
| H  | 1.01586800  | -1.78746400 | -2.68967100 |
| H  | 1.15729100  | -2.96685600 | -1.37974100 |
| C  | 1.51887300  | -2.33867500 | 1.42563000  |
| H  | 2.55133800  | -2.57396300 | 1.70972600  |
| H  | 1.12711400  | -3.17475500 | 0.84448800  |
| H  | 0.92860700  | -2.25579000 | 2.34047600  |
| C  | 1.43439400  | 0.60356300  | 2.66580300  |
| H  | 2.46706300  | 0.65885700  | 3.03348300  |
| H  | 0.91567400  | -0.16634400 | 3.23990700  |
| H  | 0.95619300  | 1.56533900  | 2.85847000  |
| C  | 1.52984900  | 2.73229700  | 0.27359500  |
| H  | 2.56742800  | 3.07478700  | 0.35939000  |
| H  | 0.99071900  | 3.05797300  | 1.16505900  |
| H  | 1.08009000  | 3.22550800  | -0.58971000 |
| O  | -2.11339900 | 1.08989100  | -0.02399100 |
| O  | -2.11252500 | -1.08781600 | -0.01931100 |
| C  | -2.80116900 | 0.00270400  | -0.02407500 |
| C  | -4.28599500 | -0.00523800 | -0.01081800 |
| H  | -4.65423800 | -0.73780000 | -0.73357800 |
| H  | -4.62269000 | -0.32671600 | 0.98142700  |
| H  | -4.67706900 | 0.98928800  | -0.22430900 |

**1a**

|   |             |             |             |
|---|-------------|-------------|-------------|
| C | -5.59634100 | -0.31227200 | 0.58576800  |
| H | -5.55211600 | 0.25013400  | 1.51587400  |
| H | -6.47828400 | -0.92659300 | 0.42975200  |
| C | -4.61689500 | -0.24424600 | -0.31566300 |
| H | -4.69977500 | -0.82855800 | -1.23374700 |
| C | -3.35883400 | 0.56635400  | -0.17335000 |
| H | -3.39659800 | 1.15425200  | 0.75268100  |
| H | -3.29455400 | 1.28941300  | -1.00038600 |
| C | -2.08713900 | -0.30113600 | -0.18343800 |
| H | -2.06576000 | -0.90406800 | -1.10219100 |
| H | -2.13541300 | -1.01580500 | 0.64866100  |
| C | -0.79798800 | 0.52085800  | -0.08445100 |
| H | -0.82296900 | 1.12691600  | 0.83241300  |
| H | -0.75766000 | 1.23582700  | -0.91873000 |
| C | 0.47146000  | -0.33737100 | -0.08998200 |
| H | 0.49614100  | -0.94352100 | -1.00682900 |
| H | 0.42999600  | -1.05232000 | 0.74402000  |
| C | 1.76195600  | 0.48304100  | 0.00966800  |
| H | 1.73686000  | 1.08933300  | 0.92646600  |
| H | 1.80306200  | 1.19812300  | -0.82444500 |
| C | 3.03171800  | -0.37462000 | 0.00440900  |
| H | 3.05732500  | -0.98121600 | -0.91234300 |
| H | 2.99109100  | -1.08990100 | 0.83852300  |
| C | 4.32316200  | 0.44494300  | 0.10413000  |
| H | 4.29653100  | 1.05036400  | 1.02044200  |
| H | 4.36277000  | 1.15899900  | -0.72980100 |
| C | 5.58536000  | -0.42221500 | 0.09807900  |
| H | 5.65214200  | -1.01402000 | -0.82207900 |
| H | 6.49296200  | 0.18593900  | 0.17009900  |
| H | 5.58549700  | -1.12330700 | 0.94060400  |

**Ir-2**

|    |             |             |             |
|----|-------------|-------------|-------------|
| Ir | 1.56239300  | 0.17029900  | -0.13693100 |
| C  | 1.24386800  | -2.00541700 | 0.23210700  |
| C  | 1.15716500  | -1.33577300 | 1.50979000  |
| C  | 2.39432200  | -0.64868800 | 1.74531700  |
| C  | 3.28550300  | -0.93830900 | 0.61947200  |
| C  | 2.57792300  | -1.77905400 | -0.30479100 |
| C  | 0.22462400  | -2.95373500 | -0.31804100 |
| H  | 0.37980000  | -3.94583500 | 0.12233300  |
| H  | 0.30813600  | -3.06020600 | -1.40082000 |
| H  | -0.79113500 | -2.63417400 | -0.08357000 |
| C  | -0.04408500 | -1.33242500 | 2.39852900  |

|   |             |             |             |
|---|-------------|-------------|-------------|
| H | -0.02979700 | -2.22346000 | 3.03743500  |
| H | -0.96741500 | -1.35195700 | 1.81582200  |
| H | -0.06518800 | -0.45263600 | 3.04316400  |
| C | 2.77008500  | 0.14917400  | 2.95581400  |
| H | 3.34117200  | -0.47229800 | 3.65475700  |
| H | 1.88762200  | 0.52097300  | 3.47952000  |
| H | 3.38908300  | 1.00618100  | 2.68187200  |
| C | 4.69838000  | -0.46088800 | 0.50762800  |
| H | 5.34484100  | -1.07478900 | 1.14570300  |
| H | 4.78776400  | 0.57743900  | 0.83504000  |
| H | 5.06792100  | -0.52944700 | -0.51641400 |
| C | 3.13381500  | -2.39897000 | -1.54918900 |
| H | 3.50983400  | -3.40336900 | -1.32439100 |
| H | 3.96125600  | -1.81440100 | -1.95477900 |
| H | 2.37311500  | -2.49919600 | -2.32645600 |
| O | 0.15244400  | 1.74128800  | 0.35224600  |
| O | 2.26273300  | 2.19881900  | 0.18429500  |
| C | 1.07852000  | 2.62159800  | 0.42176200  |
| C | 0.78957400  | 4.05521700  | 0.71944100  |
| H | 1.67197200  | 4.54085400  | 1.13841300  |
| H | 0.52407400  | 4.56330200  | -0.21441200 |
| H | -0.05908600 | 4.13370000  | 1.40134200  |
| C | 1.65294900  | 0.76254500  | -2.28381900 |
| H | 1.60694400  | 1.84799200  | -2.32727900 |
| H | 2.55460700  | 0.31817900  | -2.69577700 |
| C | 0.47384700  | 0.02118000  | -2.18444900 |
| H | 0.51860400  | -1.03585600 | -2.44002300 |
| C | -0.91236700 | 0.60837500  | -2.17654200 |
| H | -0.87445400 | 1.65996000  | -1.87971200 |
| H | -1.25312700 | 0.58550500  | -3.22319000 |
| C | -1.91965400 | -0.15217600 | -1.30499000 |
| H | -1.56027900 | -0.14808700 | -0.26870000 |
| H | -1.96038300 | -1.20162900 | -1.62802300 |
| C | -3.32738900 | 0.44868700  | -1.34956500 |
| H | -3.27857800 | 1.50289300  | -1.04419700 |
| H | -3.69598900 | 0.44397700  | -2.38446200 |
| C | -4.31868900 | -0.29661800 | -0.44894800 |
| H | -3.94312400 | -0.28872200 | 0.58527300  |
| H | -4.36149500 | -1.35310000 | -0.75091000 |
| C | -5.73198500 | 0.29584700  | -0.47716700 |
| H | -5.68762800 | 1.35300900  | -0.17957400 |
| H | -6.10770400 | 0.28628600  | -1.50983600 |
| C | -6.71923700 | -0.44682500 | 0.43000200  |
| H | -6.34234000 | -0.43738900 | 1.46315600  |

|   |              |             |             |
|---|--------------|-------------|-------------|
| H | -6.76226600  | -1.50447600 | 0.13247200  |
| C | -8.13376900  | 0.14431300  | 0.40243800  |
| H | -8.08886900  | 1.20123700  | 0.69833400  |
| H | -8.50888000  | 0.13328400  | -0.62980600 |
| C | -9.11134200  | -0.60431600 | 1.31336600  |
| H | -8.77584200  | -0.58062500 | 2.35656900  |
| H | -10.11217900 | -0.16326200 | 1.27532300  |
| H | -9.19903000  | -1.65614700 | 1.01819100  |

Ir-TS<sub>iso</sub>

|    |             |             |             |
|----|-------------|-------------|-------------|
| Ir | 1.54581700  | -0.03502000 | -0.30277700 |
| C  | 2.54421200  | -1.86879100 | 0.32051600  |
| C  | 1.37321200  | -1.72859400 | 1.13405800  |
| C  | 1.52070100  | -0.51690000 | 1.94228800  |
| C  | 2.74167800  | 0.11877200  | 1.58727600  |
| C  | 3.38147700  | -0.68761100 | 0.54560200  |
| C  | 2.89202400  | -3.02749700 | -0.55927500 |
| H  | 3.46652700  | -3.76263400 | 0.01593200  |
| H  | 3.50487600  | -2.71697600 | -1.40746700 |
| H  | 2.00036400  | -3.52730700 | -0.94244500 |
| C  | 0.25118000  | -2.71279800 | 1.25711500  |
| H  | 0.42928500  | -3.37802600 | 2.10971100  |
| H  | 0.16146700  | -3.33281800 | 0.36346600  |
| H  | -0.70435400 | -2.20994900 | 1.41919000  |
| C  | 0.53080000  | -0.00463100 | 2.93470300  |
| H  | 0.41000300  | 1.07516500  | 2.83386300  |
| H  | 0.88529800  | -0.22758800 | 3.94843500  |
| H  | -0.44635200 | -0.47231900 | 2.80818400  |
| C  | 3.28085800  | 1.39099800  | 2.15970700  |
| H  | 2.47207300  | 2.03588900  | 2.50600300  |
| H  | 3.86076300  | 1.93963900  | 1.41497700  |
| H  | 3.93898400  | 1.17086500  | 3.00788000  |
| C  | 4.73422900  | -0.43697200 | -0.03679900 |
| H  | 5.50343300  | -0.82615100 | 0.64156500  |
| H  | 4.91023300  | 0.63145400  | -0.17457600 |
| H  | 4.85218100  | -0.93069800 | -1.00263300 |
| O  | 0.32537000  | 2.32109900  | 0.66237400  |
| O  | 1.87057900  | 1.93124900  | -0.90312300 |
| C  | 1.14635700  | 2.74455400  | -0.16198200 |
| C  | 1.40512700  | 4.21140200  | -0.39966300 |
| H  | 0.66042800  | 4.81078600  | 0.12354000  |
| H  | 2.40470400  | 4.46767200  | -0.03383800 |
| H  | 1.38624600  | 4.42962900  | -1.47038700 |
| C  | 1.43250600  | -0.36943200 | -2.51871600 |

|   |              |             |             |
|---|--------------|-------------|-------------|
| H | 1.48524100   | 0.63461500  | -2.92981300 |
| H | 2.17716000   | -1.07592500 | -2.87374500 |
| C | 0.26532900   | -0.83885600 | -1.91335500 |
| H | 0.11741000   | -1.91222700 | -1.80398400 |
| C | -0.91195800  | 0.04991600  | -1.57714100 |
| H | -0.68289800  | 0.66757400  | -0.67245600 |
| H | -1.04327200  | 0.80098900  | -2.36596300 |
| C | -2.20712900  | -0.71873200 | -1.29043400 |
| H | -2.01481000  | -1.46568300 | -0.50779300 |
| H | -2.49445700  | -1.27998100 | -2.18902600 |
| C | -3.35327300  | 0.19947300  | -0.85553400 |
| H | -3.04718300  | 0.76152400  | 0.03846500  |
| H | -3.53426200  | 0.94797600  | -1.63888000 |
| C | -4.65275200  | -0.55946500 | -0.56476300 |
| H | -4.46905700  | -1.30875200 | 0.21897900  |
| H | -4.95316500  | -1.12221800 | -1.45952400 |
| C | -5.80160000  | 0.35835600  | -0.13143300 |
| H | -5.49835900  | 0.92330900  | 0.76153900  |
| H | -5.98315000  | 1.10574700  | -0.91642700 |
| C | -7.10275600  | -0.39680200 | 0.16169600  |
| H | -6.92136200  | -1.14440000 | 0.94740200  |
| H | -7.40404900  | -0.96261100 | -0.73138200 |
| C | -8.25342800  | 0.52095600  | 0.59176300  |
| H | -7.95034600  | 1.08621400  | 1.48365700  |
| H | -8.43270700  | 1.26670700  | -0.19447700 |
| C | -9.54899800  | -0.24279300 | 0.88167900  |
| H | -9.40516200  | -0.97301800 | 1.68624600  |
| H | -10.35333500 | 0.43410600  | 1.18584500  |
| H | -9.89070700  | -0.79017300 | -0.00409600 |

**Ir-2'**

|    |            |             |             |
|----|------------|-------------|-------------|
| Ir | 1.45554800 | -0.06324700 | -0.30626600 |
| C  | 2.43672100 | -1.83864000 | 0.51662800  |
| C  | 1.08628100 | -1.83224600 | 1.00670800  |
| C  | 0.91041900 | -0.64127900 | 1.83434400  |
| C  | 2.12973700 | 0.09482200  | 1.82563400  |
| C  | 3.08338600 | -0.61042100 | 0.97031400  |
| C  | 3.09218000 | -2.92574800 | -0.27549800 |
| H  | 3.57684000 | -3.63277800 | 0.40756900  |
| H  | 3.86007200 | -2.52756100 | -0.94134500 |
| H  | 2.36961200 | -3.48307500 | -0.87468600 |
| C  | 0.07225300 | -2.91941500 | 0.82318100  |
| H  | 0.14959200 | -3.64345500 | 1.64229600  |
| H  | 0.22656800 | -3.45886500 | -0.11338500 |

|   |             |             |             |
|---|-------------|-------------|-------------|
| H | -0.94475000 | -2.52284300 | 0.82522000  |
| C | -0.34127800 | -0.22695400 | 2.53955200  |
| H | -0.53428600 | 0.83460500  | 2.36872500  |
| H | -0.23327400 | -0.39622900 | 3.61702100  |
| H | -1.20613000 | -0.79474200 | 2.19314300  |
| C | 2.39386100  | 1.37277200  | 2.55466700  |
| H | 1.48176800  | 1.96155700  | 2.65683200  |
| H | 3.13682300  | 1.97649900  | 2.03070700  |
| H | 2.78336900  | 1.14919500  | 3.55466700  |
| C | 4.51781800  | -0.23341600 | 0.77260000  |
| H | 5.11532400  | -0.57577600 | 1.62568900  |
| H | 4.62898300  | 0.84928300  | 0.68953100  |
| H | 4.92713200  | -0.68550600 | -0.13233300 |
| O | -0.00891300 | 2.44141100  | 0.53113000  |
| O | 1.81922300  | 1.95396200  | -0.69481800 |
| C | 0.97865400  | 2.79652500  | -0.11338400 |
| C | 1.36132400  | 4.24737000  | -0.30701000 |
| H | 0.52779000  | 4.88989700  | -0.02374900 |
| H | 2.22397900  | 4.47657700  | 0.32758400  |
| H | 1.65806400  | 4.43489600  | -1.34128500 |
| C | 1.97768700  | -0.20680200 | -2.49733600 |
| H | 2.10211100  | 0.83829700  | -2.76338400 |
| H | 2.79501300  | -0.87430600 | -2.75330100 |
| C | 0.71414900  | -0.74857200 | -2.23636600 |
| H | 0.54792800  | -1.82230400 | -2.30106600 |
| C | -0.45281000 | 0.11494200  | -1.86861500 |
| H | -0.29557600 | 0.57425400  | -0.79442500 |
| H | -0.47439200 | 1.04450800  | -2.44829400 |
| C | -1.80636700 | -0.59067100 | -1.76817300 |
| H | -1.66501100 | -1.55742300 | -1.26800900 |
| H | -2.15123600 | -0.81428800 | -2.78551300 |
| C | -2.85687900 | 0.23327700  | -1.01641400 |
| H | -2.47675300 | 0.47277500  | -0.01275300 |
| H | -2.99532300 | 1.19774700  | -1.52247200 |
| C | -4.20420900 | -0.48644500 | -0.89691900 |
| H | -4.05488400 | -1.45754600 | -0.40201000 |
| H | -4.58688100 | -0.71359400 | -1.90135400 |
| C | -5.25085900 | 0.32220600  | -0.12216900 |
| H | -4.86215800 | 0.55327700  | 0.88013600  |
| H | -5.40118000 | 1.29039600  | -0.61946700 |
| C | -6.59725900 | -0.39856200 | 0.00773200  |
| H | -6.44508700 | -1.36890000 | 0.50227100  |
| H | -6.98546600 | -0.62708300 | -0.99490600 |
| C | -7.64471800 | 0.40735300  | 0.78522800  |



|   |             |             |             |
|---|-------------|-------------|-------------|
| H | -7.25415500 | 0.63624600  | 1.78626000  |
| H | -7.79578800 | 1.37550100  | 0.28906900  |
| C | -8.98563600 | -0.32220400 | 0.90985100  |
| H | -8.86756500 | -1.27936400 | 1.43055700  |
| H | -9.71465900 | 0.27317500  | 1.46802000  |
| H | -9.41284600 | -0.53334300 | -0.07693100 |

### Ir-TS3

|    |             |             |             |
|----|-------------|-------------|-------------|
| Ir | 1.40179700  | -0.01000400 | -0.29965600 |
| C  | 2.66902500  | -1.66931000 | 0.55401300  |
| C  | 1.27364500  | -2.06651700 | 0.61149200  |
| C  | 0.58407000  | -1.15515800 | 1.49781500  |
| C  | 1.51794900  | -0.14881400 | 1.91130200  |
| C  | 2.82379200  | -0.47119400 | 1.32895600  |
| C  | 3.75125800  | -2.40935700 | -0.16875500 |
| H  | 4.14751700  | -3.20145000 | 0.47707600  |
| H  | 4.57806300  | -1.75088200 | -0.43934000 |
| H  | 3.37701500  | -2.88316300 | -1.07902200 |
| C  | 0.69129700  | -3.31006700 | 0.01135400  |
| H  | 0.79505400  | -4.14747900 | 0.71084900  |
| H  | 1.20020900  | -3.58821200 | -0.91394200 |
| H  | -0.37197100 | -3.18910400 | -0.20535200 |
| C  | -0.84904400 | -1.25527700 | 1.91724100  |
| H  | -1.25616400 | -0.27799000 | 2.18093100  |
| H  | -0.92726300 | -1.90408100 | 2.79756800  |
| H  | -1.47188200 | -1.68503300 | 1.13016700  |
| C  | 1.24716700  | 0.98602900  | 2.85012700  |
| H  | 0.22922400  | 1.36162300  | 2.73413900  |
| H  | 1.93580600  | 1.81254900  | 2.66614300  |
| H  | 1.38301700  | 0.65741800  | 3.88657500  |
| C  | 4.08678900  | 0.28983300  | 1.58993500  |
| H  | 4.44444700  | 0.08984100  | 2.60605600  |
| H  | 3.91595300  | 1.36437500  | 1.49106600  |
| H  | 4.87528000  | 0.00934600  | 0.89003100  |
| O  | -0.35948300 | 2.41810000  | 0.10872200  |
| O  | 1.82169900  | 2.05773800  | -0.29806200 |
| C  | 0.80506800  | 2.83381400  | -0.01385200 |
| C  | 1.15115000  | 4.29051000  | 0.18076500  |
| H  | 0.33023100  | 4.91342900  | -0.17736300 |
| H  | 1.26957600  | 4.47581100  | 1.25395100  |
| H  | 2.08374500  | 4.54778400  | -0.32187100 |
| C  | 2.24849700  | 0.10399000  | -2.34456300 |
| H  | 2.37066000  | 1.16942300  | -2.51603700 |
| H  | 3.11438600  | -0.51581500 | -2.55792600 |

|   |             |             |             |
|---|-------------|-------------|-------------|
| C | 0.96484300  | -0.49257600 | -2.36337900 |
| H | 0.84436900  | -1.55824100 | -2.54884000 |
| C | -0.19214400 | 0.27866500  | -1.95456800 |
| H | -0.08565900 | 0.82428500  | -0.46714000 |
| H | -0.19327100 | 1.32652300  | -2.25739300 |
| C | -1.55224900 | -0.38788100 | -1.91177800 |
| H | -1.43224300 | -1.42573400 | -1.57565200 |
| H | -1.91356500 | -0.43973900 | -2.94874900 |
| C | -2.59086100 | 0.33114700  | -1.04315700 |
| H | -2.20306100 | 0.43572200  | -0.02284900 |
| H | -2.72894300 | 1.35497200  | -1.41126400 |
| C | -3.93558100 | -0.40116100 | -1.00663500 |
| H | -3.78040500 | -1.43140300 | -0.65185700 |
| H | -4.33444000 | -0.48973100 | -2.02641500 |
| C | -4.96812600 | 0.29210600  | -0.11082700 |
| H | -4.56232100 | 0.38141100  | 0.90752400  |
| H | -5.12290600 | 1.32020700  | -0.46591600 |
| C | -6.31447700 | -0.43832900 | -0.05956500 |
| H | -6.15760200 | -1.46835800 | 0.29227600  |
| H | -6.72001700 | -0.52438600 | -1.07750100 |
| C | -7.34591500 | 0.25283000  | 0.84024100  |
| H | -6.93810300 | 0.33914600  | 1.85680500  |
| H | -7.50109700 | 1.28099800  | 0.48660000  |
| C | -8.68753200 | -0.48465500 | 0.88437100  |
| H | -8.56489800 | -1.50534600 | 1.26433200  |
| H | -9.40485100 | 0.02829900  | 1.53229600  |
| H | -9.13168000 | -0.55516300 | -0.11488400 |

#### AcOH

|   |             |             |             |
|---|-------------|-------------|-------------|
| C | 1.39581500  | -0.11015600 | -0.00000800 |
| H | 1.67847600  | -0.69392900 | -0.88082600 |
| H | 1.67860000  | -0.69231100 | 0.88185100  |
| H | 1.91518500  | 0.84699100  | -0.00089800 |
| C | -0.09299300 | 0.12631600  | -0.00002600 |
| O | -0.64425200 | 1.20365600  | 0.00000800  |
| O | -0.77694300 | -1.04711100 | 0.00000100  |
| H | -1.71963400 | -0.81007300 | 0.00000600  |

#### Ir-4

|    |             |             |             |
|----|-------------|-------------|-------------|
| Ir | -1.48652200 | 0.37995000  | -0.29185500 |
| C  | -2.82853800 | -1.18547800 | 0.62437700  |
| C  | -1.73370000 | -0.75570300 | 1.49548500  |
| C  | -0.46394000 | -1.22965900 | 0.92315800  |
| C  | -0.76170000 | -1.76694300 | -0.34846200 |

|   |             |             |             |
|---|-------------|-------------|-------------|
| C | -2.22958900 | -1.73364700 | -0.53501800 |
| C | -4.28923500 | -1.05905800 | 0.92826100  |
| H | -4.62618200 | -1.92828300 | 1.50533300  |
| H | -4.88681900 | -1.00801900 | 0.01646600  |
| H | -4.49887200 | -0.16593500 | 1.52050400  |
| C | -1.88501500 | -0.17141700 | 2.86192900  |
| H | -1.97567200 | -0.98073800 | 3.59749300  |
| H | -2.77922900 | 0.45029100  | 2.93663600  |
| H | -1.01536500 | 0.43047400  | 3.13443900  |
| C | 0.85858800  | -1.16258500 | 1.61959200  |
| H | 0.87566500  | -1.88332000 | 2.44553100  |
| H | 1.04100600  | -0.17157500 | 2.04302500  |
| H | 1.68475600  | -1.39886300 | 0.94884100  |
| C | 0.19643300  | -2.37386500 | -1.32615200 |
| H | 0.15950900  | -3.46762400 | -1.25740600 |
| H | 1.22251600  | -2.05617300 | -1.13534300 |
| H | -0.05648300 | -2.10140600 | -2.35387000 |
| C | -2.93167400 | -2.27893500 | -1.73817000 |
| H | -2.97622600 | -3.37318700 | -1.67760800 |
| H | -2.40024100 | -2.02490400 | -2.65894500 |
| H | -3.95285100 | -1.90248200 | -1.81550100 |
| C | -2.60892800 | 2.20357300  | -0.54131500 |
| H | -2.69551600 | 2.28021300  | -1.63013100 |
| H | -3.53899800 | 2.37794600  | -0.00915900 |
| C | -1.36608300 | 2.55942400  | 0.06745300  |
| H | -1.33457900 | 2.89629000  | 1.10291800  |
| C | -0.17636300 | 2.10364700  | -0.55926900 |
| C | 1.20210800  | 2.23625200  | 0.03740400  |
| H | 1.14136700  | 2.06023700  | 1.11970100  |
| H | 1.55203300  | 3.27036100  | -0.08554800 |
| C | 2.21066300  | 1.27287900  | -0.60159000 |
| H | 1.76528400  | 0.27101600  | -0.63626800 |
| H | 2.37784500  | 1.56555800  | -1.64697700 |
| C | 3.55028200  | 1.20991000  | 0.13718900  |
| H | 3.37042700  | 0.95522800  | 1.19192300  |
| H | 4.01609500  | 2.20424400  | 0.14086600  |
| C | 4.51938000  | 0.18947400  | -0.46996000 |
| H | 4.04380300  | -0.80384700 | -0.47371800 |
| H | 4.69993600  | 0.44108800  | -1.52423300 |
| C | 5.85798000  | 0.10491900  | 0.27134300  |
| H | 5.67467900  | -0.14172800 | 1.32714400  |
| H | 6.33534800  | 1.09469700  | 0.26998800  |
| C | 6.82214500  | -0.92445400 | -0.33022800 |
| H | 6.34181500  | -1.91284600 | -0.32989400 |

|   |             |             |             |
|---|-------------|-------------|-------------|
| H | 7.00412700  | -0.67497500 | -1.38424800 |
| C | 8.15591500  | -1.00016900 | 0.41882700  |
| H | 8.00449900  | -1.27851400 | 1.46796800  |
| H | 8.82485200  | -1.74099100 | -0.02957200 |
| H | 8.67127800  | -0.03335700 | 0.40442000  |
| H | -0.19995600 | 2.06601100  | -1.66104900 |

**2a**

|   |             |             |             |
|---|-------------|-------------|-------------|
| C | -1.20092300 | -0.18030500 | -0.00001900 |
| O | -2.30068100 | -0.63661500 | 0.00013000  |
| O | -0.84556900 | 1.13236100  | -0.00006200 |
| O | -0.01619600 | -0.90807200 | -0.00013900 |
| C | 0.98207900  | 0.01591000  | -0.00008800 |
| N | 0.57801900  | 1.23586000  | 0.00005000  |
| C | 2.39041400  | -0.44509100 | 0.00005200  |
| H | 2.58452600  | -1.05702900 | 0.88590500  |
| H | 2.58444800  | -1.05792200 | -0.88515500 |
| H | 3.05503300  | 0.41945800  | -0.00019800 |

**Ir-5**

|    |             |             |             |
|----|-------------|-------------|-------------|
| Ir | 1.21866100  | -0.37706600 | -0.28876800 |
| C  | 1.12282400  | -2.46804100 | 0.42301100  |
| C  | 0.01716800  | -1.78901200 | 1.08148000  |
| C  | 0.56259100  | -0.72519200 | 1.85025100  |
| C  | 2.02841300  | -0.79712200 | 1.75689600  |
| C  | 2.36581500  | -1.90211200 | 0.91947000  |
| C  | 0.99819600  | -3.71265800 | -0.40456300 |
| H  | 0.98721400  | -4.59721100 | 0.24253200  |
| H  | 1.83480300  | -3.81998500 | -1.09865700 |
| H  | 0.07194500  | -3.71374100 | -0.98365800 |
| C  | -1.41601600 | -2.21291200 | 1.01438100  |
| H  | -1.70914800 | -2.50223600 | 0.00372200  |
| H  | -2.09258500 | -1.42691600 | 1.35054000  |
| H  | -1.56453800 | -3.08517600 | 1.66219000  |
| C  | -0.20010700 | 0.23251300  | 2.71616900  |
| H  | -0.29312500 | -0.16533700 | 3.73325500  |
| H  | -1.20391900 | 0.41089000  | 2.32622700  |
| H  | 0.30614000  | 1.19789200  | 2.78591600  |
| C  | 2.97588900  | 0.05766000  | 2.54417900  |
| H  | 3.05883400  | -0.31451900 | 3.57159500  |
| H  | 2.62629900  | 1.09186600  | 2.60274300  |
| H  | 3.97664400  | 0.05779000  | 2.10779400  |
| C  | 3.73876500  | -2.41962800 | 0.61713900  |
| H  | 3.98938800  | -3.23707100 | 1.30313000  |

|   |             |             |             |
|---|-------------|-------------|-------------|
| H | 4.49791600  | -1.64318200 | 0.73001200  |
| H | 3.80342700  | -2.81176800 | -0.40030800 |
| C | 2.37013900  | -0.25381300 | -2.14417600 |
| H | 2.55699600  | 0.78730300  | -2.39989600 |
| H | 3.23681900  | -0.90211800 | -2.24364600 |
| C | 1.07370000  | -0.80258200 | -2.41079000 |
| H | 0.95547100  | -1.86360700 | -2.62229900 |
| C | -0.06575800 | -0.00855500 | -2.11923900 |
| C | -1.47741000 | -0.52673800 | -2.19723100 |
| H | -1.49160200 | -1.60201400 | -1.97882900 |
| H | -1.83315500 | -0.42201600 | -3.23263800 |
| C | -2.43189700 | 0.22208700  | -1.25686200 |
| H | -2.00213200 | 0.22212200  | -0.24795800 |
| H | -2.48102700 | 1.27679700  | -1.55828400 |
| C | -3.84301300 | -0.37042900 | -1.21936000 |
| H | -3.78279800 | -1.44101300 | -0.97479400 |
| H | -4.29309300 | -0.31435600 | -2.21954800 |
| C | -4.75568000 | 0.32621100  | -0.20416000 |
| H | -4.29559900 | 0.26837300  | 0.79444100  |
| H | -4.81847000 | 1.39645400  | -0.44506600 |
| C | -6.16689600 | -0.26824800 | -0.14494300 |
| H | -6.10058500 | -1.34062300 | 0.08949000  |
| H | -6.62917700 | -0.20399300 | -1.13987700 |
| C | -7.07439000 | 0.41982600  | 0.88169000  |
| H | -6.60882800 | 0.35658700  | 1.87508600  |
| H | -7.14038100 | 1.49019100  | 0.64448000  |
| C | -8.48099500 | -0.18404800 | 0.93332800  |
| H | -8.44501200 | -1.24665600 | 1.19938300  |
| H | -9.10780900 | 0.32384100  | 1.67271200  |
| H | -8.98015700 | -0.10370400 | -0.03879700 |
| H | 0.02772500  | 1.06600300  | -2.27213100 |
| C | 3.70764300  | 2.38190700  | -0.12655400 |
| H | 4.12685800  | 2.95565600  | -0.95886700 |
| H | 3.91168200  | 1.32056900  | -0.26180700 |
| H | 4.17270300  | 2.74122900  | 0.79621700  |
| C | 2.24676300  | 2.60322700  | -0.05985900 |
| O | 1.77016800  | 3.84746100  | 0.12593600  |
| N | 1.30749000  | 1.71582700  | -0.15592400 |
| O | 0.07889200  | 2.43278500  | -0.02226000 |
| C | 0.37524100  | 3.75823500  | 0.15511300  |
| O | -0.38443000 | 4.65144200  | 0.30632300  |

**Ir-TS6**

|    |            |             |             |
|----|------------|-------------|-------------|
| Ir | 1.31302300 | -0.32987400 | -0.28852500 |
|----|------------|-------------|-------------|

|   |              |              |              |
|---|--------------|--------------|--------------|
| C | 1. 71989200  | -2. 34415200 | 0. 64422000  |
| C | 0. 34971600  | -2. 01649300 | 0. 97901000  |
| C | 0. 35267700  | -0. 80782600 | 1. 74912700  |
| C | 1. 73394400  | -0. 38040700 | 1. 89503500  |
| C | 2. 58415700  | -1. 35439800 | 1. 25168100  |
| C | 2. 18335000  | -3. 58923700 | -0. 05133300 |
| H | 2. 39327800  | -4. 37273100 | 0. 68538600  |
| H | 3. 10095400  | -3. 41458800 | -0. 61764300 |
| H | 1. 42702900  | -3. 97654500 | -0. 73679000 |
| C | -0. 85157500 | -2. 84973500 | 0. 65556500  |
| H | -0. 70165500 | -3. 44179800 | -0. 24892400 |
| H | -1. 74542800 | -2. 23973400 | 0. 52084800  |
| H | -1. 04029800 | -3. 54901000 | 1. 47849600  |
| C | -0. 82299400 | -0. 09912000 | 2. 34838300  |
| H | -0. 86548800 | 0. 94002000  | 2. 01118400  |
| H | -0. 73967600 | -0. 10219100 | 3. 44111000  |
| H | -1. 76398300 | -0. 57977200 | 2. 07942400  |
| C | 2. 17287000  | 0. 80307700  | 2. 70074900  |
| H | 2. 20723500  | 0. 53642100  | 3. 76291600  |
| H | 1. 47499000  | 1. 63574700  | 2. 58777500  |
| H | 3. 16790100  | 1. 14288900  | 2. 40851800  |
| C | 4. 08069200  | -1. 38853500 | 1. 28544000  |
| H | 4. 41843700  | -1. 97011600 | 2. 15135600  |
| H | 4. 50300700  | -0. 38563100 | 1. 37129900  |
| H | 4. 49222800  | -1. 85717000 | 0. 38936500  |
| C | 2. 41265400  | -0. 48910500 | -2. 18979900 |
| H | 2. 60710200  | 0. 52198000  | -2. 53477200 |
| H | 3. 27261600  | -1. 15249100 | -2. 19446900 |
| C | 1. 11248300  | -1. 05474400 | -2. 36618200 |
| H | 0. 99509900  | -2. 13588900 | -2. 41880800 |
| C | -0. 03423000 | -0. 24605800 | -2. 21961100 |
| C | -1. 43043600 | -0. 78920500 | -2. 20650300 |
| H | -1. 41824700 | -1. 86074900 | -1. 97557500 |
| H | -1. 82090400 | -0. 69722000 | -3. 23167400 |
| C | -2. 36889900 | -0. 03858700 | -1. 24803100 |
| H | -1. 92823600 | -0. 04447400 | -0. 24535100 |
| H | -2. 41034000 | 1. 01845300  | -1. 53218500 |
| C | -3. 77866300 | -0. 63312000 | -1. 20333000 |
| H | -3. 72188300 | -1. 70382500 | -0. 95432700 |
| H | -4. 23196000 | -0. 58128700 | -2. 20237200 |
| C | -4. 68473700 | 0. 07581100  | -0. 19011600 |
| H | -4. 22856900 | 0. 01377500  | 0. 80973000  |
| H | -4. 73121200 | 1. 14603800  | -0. 43296500 |
| C | -6. 10430300 | -0. 49877400 | -0. 13610300 |

|   |             |             |             |
|---|-------------|-------------|-------------|
| H | -6.05583200 | -1.57144000 | 0.10158600  |
| H | -6.56062800 | -0.42988200 | -1.13348300 |
| C | -7.00584900 | 0.20709800  | 0.88378400  |
| H | -6.54822900 | 0.13666800  | 1.88033200  |
| H | -7.05024400 | 1.27805300  | 0.64475300  |
| C | -8.42367800 | -0.37055800 | 0.92605200  |
| H | -8.40969100 | -1.43348500 | 1.19291400  |
| H | -9.04563000 | 0.14971000  | 1.66083100  |
| H | -8.91462800 | -0.28114000 | -0.04944600 |
| H | 0.05838900  | 0.82092300  | -2.41052100 |
| C | 3.45017200  | 2.77617500  | -0.24772200 |
| H | 3.73955600  | 3.49079300  | -1.02230100 |
| H | 3.89143200  | 1.80040500  | -0.45036800 |
| H | 3.79834200  | 3.15831600  | 0.71562400  |
| C | 1.93170100  | 2.71927000  | -0.20184300 |
| O | 1.31546500  | 3.81387100  | 0.02232800  |
| N | 1.38582100  | 1.55982500  | -0.43076200 |
| O | -0.58093800 | 2.41393100  | -0.18084700 |
| C | -0.39572300 | 3.61494400  | 0.05390000  |
| O | -0.92423500 | 4.64651500  | 0.29052100  |

**CO<sub>2</sub>**

|   |            |            |             |
|---|------------|------------|-------------|
| C | 0.00000000 | 0.00000000 | -0.00001700 |
| O | 0.00000000 | 0.00000000 | 1.16931700  |
| O | 0.00000000 | 0.00000000 | -1.16930500 |

**Ir-7**

|    |             |             |             |
|----|-------------|-------------|-------------|
| Ir | 1.33251300  | -0.08743100 | -0.34648900 |
| C  | 2.67283400  | -0.48713500 | 1.40655000  |
| C  | 1.90157800  | -1.68893000 | 1.21283200  |
| C  | 0.51307400  | -1.36350500 | 1.40823700  |
| C  | 0.41365800  | 0.03343400  | 1.75657800  |
| C  | 1.74838300  | 0.58548100  | 1.74176600  |
| C  | 4.16668500  | -0.38371300 | 1.41331700  |
| H  | 4.54581100  | -0.57131700 | 2.42490700  |
| H  | 4.49869500  | 0.61082700  | 1.10989000  |
| H  | 4.62419900  | -1.11579300 | 0.74505600  |
| C  | 2.46434500  | -3.05254000 | 0.94535900  |
| H  | 2.74495700  | -3.53262400 | 1.88961300  |
| H  | 3.36139400  | -3.00429800 | 0.32361600  |
| H  | 1.73974100  | -3.70321200 | 0.45149800  |
| C  | -0.63123000 | -2.32859500 | 1.37237400  |
| H  | -0.80831400 | -2.72377900 | 2.37946100  |
| H  | -0.42656700 | -3.17774300 | 0.71760300  |

|   |             |             |             |
|---|-------------|-------------|-------------|
| H | -1.55144000 | -1.84882700 | 1.03580000  |
| C | -0.82160100 | 0.78333500  | 2.14525900  |
| H | -0.79074200 | 0.99908000  | 3.21999600  |
| H | -1.72527700 | 0.20630600  | 1.94561400  |
| H | -0.88277200 | 1.73000000  | 1.60311800  |
| C | 2.12149100  | 1.95878000  | 2.20542200  |
| H | 2.28853000  | 1.93980800  | 3.28867400  |
| H | 1.32638400  | 2.67602100  | 1.99631800  |
| H | 3.04141300  | 2.30838100  | 1.73227800  |
| C | 2.44812400  | -0.92428800 | -2.06608800 |
| H | 2.62907100  | -0.08449600 | -2.72897300 |
| H | 3.31861800  | -1.52360400 | -1.81773800 |
| C | 1.16185900  | -1.53744400 | -2.02665000 |
| H | 1.06562700  | -2.56009400 | -1.66510100 |
| C | -0.00383700 | -0.76881800 | -2.21748200 |
| C | -1.38970600 | -1.28390600 | -1.99276100 |
| H | -1.36477900 | -2.20384600 | -1.39808000 |
| H | -1.79753700 | -1.55872300 | -2.97758500 |
| C | -2.31680900 | -0.24128700 | -1.34283700 |
| H | -1.84987300 | 0.12051100  | -0.41988300 |
| H | -2.39081400 | 0.63553900  | -1.99814900 |
| C | -3.71384800 | -0.78866400 | -1.03795000 |
| H | -3.62594700 | -1.69009300 | -0.41260100 |
| H | -4.19409300 | -1.11516600 | -1.97004400 |
| C | -4.60755500 | 0.23469200  | -0.32791900 |
| H | -4.11757200 | 0.56083000  | 0.60185100  |
| H | -4.69569300 | 1.13403100  | -0.95252400 |
| C | -6.00587700 | -0.30201300 | -0.00348200 |
| H | -5.91522300 | -1.20492700 | 0.61776200  |
| H | -6.49617500 | -0.62216400 | -0.93346500 |
| C | -6.89611000 | 0.71993700  | 0.71369500  |
| H | -6.40300200 | 1.04003900  | 1.64198900  |
| H | -6.98507900 | 1.62006000  | 0.09082600  |
| C | -8.29108600 | 0.17427600  | 1.03306700  |
| H | -8.23159600 | -0.70806700 | 1.68046200  |
| H | -8.90538900 | 0.92193200  | 1.54396300  |
| H | -8.81743500 | -0.12152800 | 0.11869100  |
| H | 0.08419200  | 0.15453000  | -2.78448200 |
| C | 2.16336800  | 3.75063900  | -0.98029000 |
| H | 3.08861100  | 3.22710200  | -1.23581600 |
| H | 2.31548000  | 4.39174700  | -0.10858400 |
| H | 1.88080800  | 4.38508000  | -1.82635000 |
| C | 1.02512500  | 2.79689800  | -0.68331300 |
| N | 1.14567900  | 1.55410300  | -1.25137000 |



|   |            |            |             |
|---|------------|------------|-------------|
| 0 | 0.00767100 | 3.11776800 | -0.06805600 |
|---|------------|------------|-------------|

**Ir-TS8**

|    |             |             |             |
|----|-------------|-------------|-------------|
| Ir | 1.50952500  | -0.05045800 | -0.34558900 |
| C  | 3.25060200  | 0.39315500  | 0.91745800  |
| C  | 3.17478600  | -1.05050300 | 0.86047600  |
| C  | 1.91548700  | -1.43952100 | 1.41198900  |
| C  | 1.22008600  | -0.24679900 | 1.87483500  |
| C  | 2.04499200  | 0.89044600  | 1.58124800  |
| C  | 4.42541700  | 1.22821000  | 0.51603400  |
| H  | 5.11658500  | 1.32358100  | 1.36231400  |
| H  | 4.11698700  | 2.23278400  | 0.22054500  |
| H  | 4.97133100  | 0.77935400  | -0.31579100 |
| C  | 4.24163500  | -1.96262900 | 0.33571800  |
| H  | 4.93522300  | -2.23171700 | 1.14039300  |
| H  | 4.82183400  | -1.48462700 | -0.45627700 |
| H  | 3.82256700  | -2.88958000 | -0.06202500 |
| C  | 1.40399000  | -2.84017700 | 1.55621500  |
| H  | 1.61973600  | -3.21370800 | 2.56365200  |
| H  | 1.87604400  | -3.51874900 | 0.84307700  |
| H  | 0.32183100  | -2.88828200 | 1.41257100  |
| C  | -0.11553100 | -0.19508400 | 2.54748200  |
| H  | 0.01675100  | -0.04315400 | 3.62532600  |
| H  | -0.67246900 | -1.12310500 | 2.40681100  |
| H  | -0.71179900 | 0.62956100  | 2.14894800  |
| C  | 1.78128500  | 2.30109600  | 2.00934200  |
| H  | 2.16370200  | 2.45776800  | 3.02438200  |
| H  | 0.71153700  | 2.51870200  | 2.00854400  |
| H  | 2.27748500  | 3.01797300  | 1.35194600  |
| C  | 1.96754400  | -0.90732400 | -2.37031900 |
| H  | 1.95817700  | -0.08745600 | -3.08044200 |
| H  | 2.86004800  | -1.52458100 | -2.36344000 |
| C  | 0.75521400  | -1.44466100 | -1.88746000 |
| H  | 0.72994700  | -2.43062000 | -1.42528400 |
| C  | -0.50688900 | -0.74634100 | -1.98454500 |
| C  | -1.71955300 | -1.27127200 | -1.29730500 |
| H  | -1.44543800 | -1.74245500 | -0.34592100 |
| H  | -2.06422900 | -2.09039100 | -1.95644900 |
| C  | -2.86876900 | -0.27280900 | -1.11081600 |
| H  | -2.52449700 | 0.54199500  | -0.46861700 |
| H  | -3.11984300 | 0.17082900  | -2.08374200 |
| C  | -4.11330900 | -0.92993600 | -0.50507200 |
| H  | -3.84849100 | -1.38632300 | 0.46008500  |
| H  | -4.45186800 | -1.75339500 | -1.14984100 |

|   |             |             |             |
|---|-------------|-------------|-------------|
| C | -5.26306000 | 0.06191000  | -0.29547200 |
| H | -4.91703900 | 0.88659100  | 0.34309600  |
| H | -5.53001700 | 0.51521900  | -1.26033700 |
| C | -6.50829700 | -0.57901600 | 0.32725300  |
| H | -6.24026100 | -1.03296700 | 1.29226500  |
| H | -6.85146400 | -1.40510800 | -0.31178100 |
| C | -7.65974700 | 0.41174300  | 0.53637600  |
| H | -7.31418300 | 1.23717500  | 1.17352800  |
| H | -7.92637600 | 0.86342000  | -0.42867000 |
| C | -8.89856100 | -0.23741700 | 1.16067800  |
| H | -8.66645700 | -0.66893200 | 2.14106100  |
| H | -9.70458400 | 0.48973000  | 1.29904200  |
| H | -9.28271000 | -1.04467200 | 0.52685000  |
| H | -0.67037800 | -0.10014000 | -2.83777800 |
| C | 0.34479200  | 3.58148300  | -1.08492900 |
| H | 0.23792800  | 4.29852200  | -0.26874800 |
| H | -0.25249300 | 3.92802800  | -1.93502300 |
| H | 1.38554300  | 3.51724800  | -1.41172100 |
| C | -0.19962000 | 2.23798200  | -0.62837900 |
| N | 0.37900500  | 1.17027000  | -1.30278800 |
| O | -1.08376400 | 2.13120900  | 0.21530800  |

**Ir-9**

|    |            |             |             |
|----|------------|-------------|-------------|
| Ir | 1.53090300 | -0.17855100 | -0.19001700 |
| C  | 3.70740500 | 0.23633800  | 0.00321300  |
| C  | 3.46079300 | -1.05433100 | 0.58601300  |
| C  | 2.51867700 | -0.87510200 | 1.65393900  |
| C  | 2.24767900 | 0.56045700  | 1.79153800  |
| C  | 2.98835900 | 1.24479800  | 0.78601400  |
| C  | 4.63991200 | 0.53553900  | -1.12746200 |
| H  | 5.62562400 | 0.81035300  | -0.73378900 |
| H  | 4.27711000 | 1.36978700  | -1.73175800 |
| H  | 4.77025100 | -0.32953300 | -1.78006700 |
| C  | 4.07715300 | -2.35604400 | 0.16992600  |
| H  | 4.94773400 | -2.57561200 | 0.79785100  |
| H  | 4.41761200 | -2.32951000 | -0.86697200 |
| H  | 3.37377200 | -3.18520200 | 0.27704300  |
| C  | 1.99879800 | -1.93962200 | 2.56599100  |
| H  | 2.62701200 | -1.99391400 | 3.46367800  |
| H  | 2.01185500 | -2.92044000 | 2.08745500  |
| H  | 0.97725400 | -1.72528500 | 2.88650700  |
| C  | 1.39827100 | 1.19559700  | 2.84577800  |
| H  | 2.02824900 | 1.48419500  | 3.69610200  |
| H  | 0.63660200 | 0.50502200  | 3.21282100  |

|   |              |             |             |
|---|--------------|-------------|-------------|
| H | 0.89698300   | 2.08062400  | 2.45463100  |
| C | 3.03222000   | 2.72391700  | 0.58859700  |
| H | 3.62140500   | 3.18633300  | 1.38926900  |
| H | 2.02205000   | 3.14086900  | 0.62411500  |
| H | 3.49088200   | 2.99073000  | -0.36481700 |
| C | 1.52808600   | -1.31487400 | -2.15623600 |
| H | 1.64686700   | -0.52372300 | -2.89386700 |
| H | 2.27445000   | -2.10280800 | -2.18213100 |
| C | 0.31752500   | -1.52051000 | -1.50678400 |
| H | 0.10991500   | -2.47654300 | -1.03173400 |
| C | -0.81964400  | -0.48480500 | -1.57726500 |
| C | -2.09310200  | -1.07202800 | -0.94478800 |
| H | -1.82855000  | -1.44300900 | 0.05485800  |
| H | -2.36935800  | -1.94927300 | -1.54523100 |
| C | -3.29840700  | -0.13670700 | -0.83617800 |
| H | -3.04876200  | 0.71754200  | -0.19447700 |
| H | -3.54500600  | 0.27241000  | -1.82462700 |
| C | -4.53214800  | -0.84264600 | -0.25934400 |
| H | -4.28261400  | -1.26282000 | 0.72516700  |
| H | -4.79395400  | -1.69683600 | -0.89897200 |
| C | -5.74505700  | 0.08479900  | -0.12481500 |
| H | -5.48049800  | 0.93843000  | 0.51558200  |
| H | -5.99013800  | 0.50692500  | -1.10971700 |
| C | -6.98121700  | -0.61672300 | 0.44884700  |
| H | -6.73542300  | -1.03968900 | 1.43343400  |
| H | -7.24421000  | -1.47078000 | -0.19133100 |
| C | -8.19650600  | 0.30845000  | 0.58377400  |
| H | -7.93162500  | 1.16145100  | 1.22333800  |
| H | -8.43989300  | 0.73014900  | -0.40087900 |
| C | -9.42580900  | -0.40284600 | 1.15712400  |
| H | -9.21875000  | -0.80613300 | 2.15491800  |
| H | -10.27821600 | 0.27802100  | 1.24310400  |
| H | -9.73045400  | -1.23999900 | 0.51890900  |
| H | -1.02050500  | -0.16138100 | -2.60804700 |
| C | -1.52831300  | 2.52219600  | -1.62445400 |
| H | -2.41080800  | 2.92381700  | -1.12139300 |
| H | -1.84484200  | 1.84982700  | -2.42003900 |
| H | -0.99127400  | 3.36902900  | -2.06213300 |
| C | -0.60932900  | 1.89922000  | -0.59274100 |
| N | -0.17218000  | 0.57430700  | -0.77786100 |
| O | -0.16963600  | 2.55935500  | 0.33692900  |

**Ir-10**

|    |             |            |             |
|----|-------------|------------|-------------|
| Ir | -1.54795600 | 0.04101400 | -0.27777500 |
|----|-------------|------------|-------------|

|   |             |             |             |
|---|-------------|-------------|-------------|
| C | -3.72270500 | -0.46967300 | -0.18648800 |
| C | -3.57508900 | 0.94479700  | -0.46982800 |
| C | -2.91372500 | 1.52953400  | 0.66664400  |
| C | -2.59285900 | 0.48977600  | 1.62171000  |
| C | -3.11386700 | -0.75631000 | 1.09055200  |
| C | -4.52117400 | -1.44247100 | -0.99499600 |
| H | -5.53692100 | -1.48244000 | -0.58392800 |
| H | -4.10766600 | -2.45127400 | -0.94882300 |
| H | -4.60151200 | -1.14216200 | -2.04053000 |
| C | -4.14919300 | 1.68577200  | -1.63933900 |
| H | -5.17654000 | 2.00353800  | -1.42585800 |
| H | -4.17379400 | 1.06196000  | -2.53557600 |
| H | -3.56159300 | 2.57710700  | -1.86817100 |
| C | -2.60324300 | 2.98340600  | 0.81364700  |
| H | -3.51649800 | 3.51435800  | 1.10625100  |
| H | -2.24682200 | 3.40766600  | -0.12680100 |
| H | -1.85001800 | 3.16043700  | 1.58200500  |
| C | -1.98595200 | 0.66966900  | 2.97870800  |
| H | -2.77797000 | 0.76829800  | 3.73034900  |
| H | -1.36659700 | 1.56767400  | 3.02310200  |
| H | -1.35846300 | -0.18636600 | 3.22512800  |
| C | -3.16255800 | -2.06233000 | 1.81332200  |
| H | -4.00906100 | -2.05191600 | 2.51090900  |
| H | -2.24567800 | -2.23001700 | 2.37826300  |
| H | -3.30775300 | -2.89730600 | 1.12486300  |
| C | -1.57830700 | -1.30046500 | -2.15801100 |
| H | -1.69117900 | -2.30883300 | -1.76938600 |
| H | -2.35642000 | -0.95417300 | -2.82976900 |
| C | -0.35822900 | -0.65677500 | -2.11581600 |
| H | -0.17100400 | 0.20556700  | -2.75116400 |
| C | 0.78660700  | -1.24612000 | -1.29273100 |
| C | 2.11750500  | -0.53807400 | -1.58742000 |
| H | 1.97070200  | 0.54419700  | -1.49928300 |
| H | 2.35997500  | -0.71914900 | -2.64281200 |
| C | 3.29381300  | -0.96901600 | -0.70829400 |
| H | 3.00618000  | -0.91648600 | 0.34931600  |
| H | 3.54295100  | -2.01842400 | -0.91534200 |
| C | 4.53774300  | -0.09937400 | -0.92335600 |
| H | 4.28370300  | 0.94646000  | -0.69559900 |
| H | 4.82229600  | -0.12091500 | -1.98436400 |
| C | 5.73090600  | -0.52924500 | -0.06338200 |
| H | 5.43788400  | -0.51477200 | 0.99605300  |
| H | 5.98657000  | -1.57284100 | -0.29451000 |
| C | 6.96875400  | 0.35264100  | -0.26121200 |

|   |             |             |             |
|---|-------------|-------------|-------------|
| H | 6.71259100  | 1.39670100  | -0.02946700 |
| H | 7.25915800  | 0.33983100  | -1.32139600 |
| C | 8.16447500  | -0.07741700 | 0.59692000  |
| H | 7.87180300  | -0.06532500 | 1.65567000  |
| H | 8.41893300  | -1.12011300 | 0.36354600  |
| C | 9.39536400  | 0.81079700  | 0.39241400  |
| H | 9.17674700  | 1.85362900  | 0.64931400  |
| H | 10.23347600 | 0.48299800  | 1.01506800  |
| H | 9.72745500  | 0.79030000  | -0.65174800 |
| H | 0.89258400  | -2.31089500 | -1.52804100 |
| C | 1.04684600  | -3.35762800 | 0.75764700  |
| H | 2.06000900  | -3.21313100 | 0.37706100  |
| H | 0.48591300  | -3.91743600 | 0.00015400  |
| H | 1.08413200  | -3.94374200 | 1.67511800  |
| C | 0.35631700  | -2.04221000 | 1.07057500  |
| N | 0.27854300  | -1.05128400 | 0.09304300  |
| O | -0.11872300 | -1.83540200 | 2.18378100  |
| C | 1.43111000  | 3.37290300  | 0.29171900  |
| H | 0.81799800  | 4.09694900  | -0.24289000 |
| H | 2.41458600  | 3.30128500  | -0.18496400 |
| H | 1.59481800  | 3.68587600  | 1.32605200  |
| C | 0.79322600  | 2.01744400  | 0.27117900  |
| O | 1.30985000  | 1.12870800  | 1.05914700  |
| H | 0.91023400  | 0.19447700  | 0.79738700  |
| O | -0.17199500 | 1.77938800  | -0.50078000 |

### Ir-TS11

|    |             |             |             |
|----|-------------|-------------|-------------|
| Ir | -1.56009300 | 0.05380600  | -0.27701200 |
| C  | -3.69621700 | -0.60508400 | -0.18322100 |
| C  | -3.63251500 | 0.81790500  | -0.47596200 |
| C  | -3.01784600 | 1.45147100  | 0.66075200  |
| C  | -2.63234700 | 0.43773900  | 1.61914900  |
| C  | -3.08058100 | -0.84146200 | 1.09610000  |
| C  | -4.42869500 | -1.62925300 | -0.99119000 |
| H  | -5.44966800 | -1.71638400 | -0.60100000 |
| H  | -3.96440300 | -2.61449600 | -0.92180600 |
| H  | -4.50185000 | -1.34893700 | -2.04279000 |
| C  | -4.25299900 | 1.51400200  | -1.64895500 |
| H  | -5.30163900 | 1.75573900  | -1.43917900 |
| H  | -4.22943700 | 0.88922600  | -2.54454500 |
| H  | -3.73127200 | 2.44587300  | -1.87562500 |
| C  | -2.79596900 | 2.92227400  | 0.79696300  |
| H  | -3.74434000 | 3.40257300  | 1.06399200  |
| H  | -2.44335200 | 3.35495900  | -0.14113800 |

|   |             |             |             |
|---|-------------|-------------|-------------|
| H | -2.06893900 | 3.15061900  | 1.57659300  |
| C | -2.02725000 | 0.65639000  | 2.97124300  |
| H | -2.81487800 | 0.68024000  | 3.73338500  |
| H | -1.48529300 | 1.60279100  | 3.01691400  |
| H | -1.32675500 | -0.14587000 | 3.20348100  |
| C | -3.04555200 | -2.14280300 | 1.82808200  |
| H | -3.90243200 | -2.18851400 | 2.51139600  |
| H | -2.13090300 | -2.24212500 | 2.41233700  |
| H | -3.11865700 | -2.99122900 | 1.14459400  |
| C | -1.51431400 | -1.22378800 | -2.20045000 |
| H | -1.60731100 | -2.25050100 | -1.85717300 |
| H | -2.28983900 | -0.87061600 | -2.87188800 |
| C | -0.31356600 | -0.54977000 | -2.10766700 |
| H | -0.13917100 | 0.34441000  | -2.70092500 |
| C | 0.83506600  | -1.13938100 | -1.29144100 |
| C | 2.16839900  | -0.43559200 | -1.57652300 |
| H | 2.03330000  | 0.64610400  | -1.46538800 |
| H | 2.40818800  | -0.60076000 | -2.63497600 |
| C | 3.33738900  | -0.89756600 | -0.70281400 |
| H | 3.05309600  | -0.84287100 | 0.35570800  |
| H | 3.56175500  | -1.95153900 | -0.91647000 |
| C | 4.60011200  | -0.05517300 | -0.91686000 |
| H | 4.36996100  | 0.99455700  | -0.68383100 |
| H | 4.88193800  | -0.07929800 | -1.97859200 |
| C | 5.78480500  | -0.51658200 | -0.06141600 |
| H | 5.49437600  | -0.50002800 | 0.99866900  |
| H | 6.01639500  | -1.56470800 | -0.29781100 |
| C | 7.04187400  | 0.33803600  | -0.25783500 |
| H | 6.80971300  | 1.38630700  | -0.02039400 |
| H | 7.32968500  | 0.32386300  | -1.31872600 |
| C | 8.22936800  | -0.12318000 | 0.59551700  |
| H | 7.93906700  | -0.11021800 | 1.65490500  |
| H | 8.46025000  | -1.17002500 | 0.35608300  |
| C | 9.47923700  | 0.73867600  | 0.39333400  |
| H | 9.28420900  | 1.78458400  | 0.65654600  |
| H | 10.31116600 | 0.38890700  | 1.01234600  |
| H | 9.80867100  | 0.71679200  | -0.65165200 |
| H | 0.93683900  | -2.20253200 | -1.53109100 |
| C | 1.02140300  | -3.32249900 | 0.70022600  |
| H | 2.03711500  | -3.21603900 | 0.31195100  |
| H | 0.42386200  | -3.82445600 | -0.06942300 |
| H | 1.03936900  | -3.94083000 | 1.59688600  |
| C | 0.41406200  | -1.98316400 | 1.06739900  |
| N | 0.34039700  | -0.95996800 | 0.10619000  |

|   |             |             |             |
|---|-------------|-------------|-------------|
| O | -0.00249300 | -1.76694900 | 2.19793900  |
| C | 1.27823100  | 3.45617300  | 0.33351700  |
| H | 0.61311300  | 4.16671200  | -0.15560900 |
| H | 2.24483700  | 3.44554800  | -0.18101300 |
| H | 1.46661800  | 3.74721600  | 1.36993900  |
| C | 0.70455100  | 2.06927900  | 0.30030700  |
| O | 1.27029400  | 1.17818400  | 1.02541400  |
| H | 0.87258800  | 0.16623800  | 0.70459800  |
| O | -0.28548100 | 1.83070500  | -0.45863000 |

**P-C3**

|   |             |             |             |
|---|-------------|-------------|-------------|
| C | 3.93030900  | 2.42938400  | 0.38697700  |
| H | 3.83139300  | 2.35418100  | 1.46775500  |
| H | 4.65903200  | 3.14197500  | 0.01318200  |
| C | 3.18753400  | 1.68528600  | -0.43159300 |
| H | 3.30597700  | 1.77263300  | -1.51191400 |
| C | 2.14898200  | 0.68393300  | 0.02151500  |
| C | 0.73085600  | 1.12634200  | -0.38452900 |
| H | 0.67479800  | 1.17400300  | -1.48238300 |
| H | 0.58434500  | 2.15309400  | -0.02963200 |
| C | -0.38149000 | 0.22210400  | 0.15738200  |
| H | -0.21270200 | -0.80935300 | -0.17485400 |
| H | -0.32233400 | 0.19962900  | 1.25469600  |
| C | -1.78108100 | 0.67742100  | -0.26870800 |
| H | -1.83737700 | 0.70008500  | -1.36644600 |
| H | -1.94694900 | 1.71196200  | 0.06410200  |
| C | -2.89941100 | -0.21686400 | 0.27707300  |
| H | -2.73073300 | -1.25128200 | -0.05422600 |
| H | -2.84393600 | -0.23796500 | 1.37480800  |
| C | -4.30071200 | 0.23113300  | -0.15114200 |
| H | -4.35664000 | 0.25130100  | -1.24906700 |
| H | -4.46891200 | 1.26639000  | 0.17903100  |
| C | -5.42016600 | -0.66190600 | 0.39547700  |
| H | -5.25074800 | -1.69573700 | 0.06509100  |
| H | -5.36343400 | -0.68098800 | 1.49239400  |
| C | -6.81600900 | -0.20585700 | -0.03889400 |
| H | -6.90915200 | -0.20859900 | -1.13096500 |
| H | -7.59677200 | -0.85906700 | 0.36399400  |
| H | -7.02258300 | 0.81368500  | 0.30640500  |
| H | 2.17952300  | 0.61443300  | 1.11527400  |
| C | 4.07316500  | -1.25685300 | 1.19140200  |
| H | 3.35697800  | -1.21360800 | 2.01921700  |
| H | 4.59280000  | -0.29464500 | 1.14914400  |
| H | 4.78960200  | -2.05618600 | 1.37683000  |

|   |            |             |             |
|---|------------|-------------|-------------|
| C | 3.37057700 | -1.55266300 | -0.12303000 |
| N | 2.41526900 | -0.64901200 | -0.52655100 |
| O | 3.61153500 | -2.55135200 | -0.78845300 |
| H | 2.03333400 | -0.86080400 | -1.44053100 |

**Ir-TS8'**

|    |             |             |             |
|----|-------------|-------------|-------------|
| Ir | -1.20990300 | -0.07364300 | -0.22713300 |
| C  | -2.20832500 | 1.91198600  | -0.08465300 |
| C  | -0.83914600 | 2.16408000  | -0.45635500 |
| C  | 0.00065600  | 1.65336300  | 0.58837300  |
| C  | -0.85051500 | 1.08701900  | 1.62219600  |
| C  | -2.22355500 | 1.26190600  | 1.21733000  |
| C  | -3.41851200 | 2.33524400  | -0.85721200 |
| H  | -3.71913300 | 3.34323400  | -0.54768600 |
| H  | -4.26372500 | 1.66765600  | -0.67750900 |
| H  | -3.22163300 | 2.36449200  | -1.93098100 |
| C  | -0.37489800 | 2.89333000  | -1.68140100 |
| H  | -0.33620300 | 3.97135100  | -1.48807600 |
| H  | -1.04917900 | 2.73516100  | -2.52649100 |
| H  | 0.62598300  | 2.57562400  | -1.98070000 |
| C  | 1.48372800  | 1.82567500  | 0.67308400  |
| H  | 1.70182400  | 2.83313800  | 1.04752300  |
| H  | 1.96472400  | 1.72342400  | -0.30054100 |
| H  | 1.94020400  | 1.11050100  | 1.35714600  |
| C  | -0.40370500 | 0.47374400  | 2.91143000  |
| H  | -0.49120500 | 1.21064300  | 3.71883600  |
| H  | 0.63634800  | 0.14815600  | 2.85939800  |
| H  | -1.01940700 | -0.39402500 | 3.15767200  |
| C  | -3.42777600 | 0.95660900  | 2.05200300  |
| H  | -3.61836700 | 1.78648700  | 2.74212900  |
| H  | -3.27938100 | 0.05087600  | 2.64336700  |
| H  | -4.32012000 | 0.82479800  | 1.43633000  |
| C  | -2.17034900 | -1.42379200 | -2.04984000 |
| H  | -2.26094900 | -2.49921800 | -1.99972400 |
| H  | -3.07027500 | -0.88857900 | -2.33847200 |
| C  | -0.88464400 | -0.81432500 | -2.30072100 |
| H  | -0.84299400 | 0.06259800  | -2.94514500 |
| C  | 0.27515300  | -1.30459400 | -1.68844100 |
| C  | 1.65451200  | -0.77549500 | -1.95034200 |
| H  | 1.61896900  | 0.30441500  | -2.14077500 |
| H  | 2.01481800  | -1.23315900 | -2.88463100 |
| C  | 2.63968400  | -1.10519400 | -0.82011300 |
| H  | 2.21093000  | -0.77848800 | 0.13445600  |
| H  | 2.74172900  | -2.19557800 | -0.74483500 |



|   |             |             |             |
|---|-------------|-------------|-------------|
| C | 4.01983600  | -0.47232800 | -1.01723800 |
| H | 3.91158000  | 0.61563300  | -1.14033700 |
| H | 4.45843200  | -0.83774000 | -1.95567700 |
| C | 4.98000200  | -0.75439800 | 0.14353300  |
| H | 4.53361700  | -0.38755800 | 1.07990600  |
| H | 5.09128300  | -1.84041300 | 0.26691000  |
| C | 6.36135800  | -0.11742700 | -0.04340600 |
| H | 6.24741700  | 0.96878000  | -0.17230000 |
| H | 6.80835100  | -0.48799900 | -0.97653300 |
| C | 7.31940400  | -0.39177300 | 1.12195100  |
| H | 6.86991100  | -0.02198500 | 2.05385800  |
| H | 7.43179500  | -1.47694300 | 1.24823100  |
| C | 8.69633400  | 0.24918000  | 0.92446600  |
| H | 8.61501600  | 1.33775800  | 0.82651400  |
| H | 9.35989700  | 0.03907000  | 1.76879900  |
| H | 9.18076400  | -0.12910000 | 0.01732400  |
| H | 0.21827600  | -2.28026200 | -1.21296400 |
| C | -4.17258900 | -2.49043000 | 0.56927600  |
| H | -4.15713800 | -3.31060100 | -0.15486200 |
| H | -4.61555400 | -1.61774100 | 0.07716400  |
| H | -4.78018400 | -2.77367300 | 1.42975400  |
| C | -2.77328100 | -2.16926700 | 1.04170100  |
| N | -1.82318200 | -1.87076500 | 0.07662200  |
| O | -2.41398400 | -2.21418800 | 2.21401300  |

**Ir-9'**

|    |             |             |             |
|----|-------------|-------------|-------------|
| Ir | -1.22466400 | 0.06921000  | 0.13095600  |
| C  | -1.13790500 | -1.78362400 | 1.29846100  |
| C  | 0.15459200  | -1.67155600 | 0.67783600  |
| C  | -0.04674800 | -1.64512500 | -0.73875000 |
| C  | -1.47296000 | -1.82870800 | -1.01157400 |
| C  | -2.14513000 | -1.93117300 | 0.24325200  |
| C  | -1.40242200 | -1.89424900 | 2.76592500  |
| H  | -1.38773600 | -2.94933100 | 3.06586600  |
| H  | -2.38145400 | -1.48710300 | 3.02630800  |
| H  | -0.64445500 | -1.36903600 | 3.35019900  |
| C  | 1.46457400  | -1.67877700 | 1.40364500  |
| H  | 1.75762600  | -2.71410900 | 1.61288700  |
| H  | 1.39912300  | -1.15903000 | 2.36191200  |
| H  | 2.26131400  | -1.21869600 | 0.82073000  |
| C  | 0.99890000  | -1.61525400 | -1.80888800 |
| H  | 1.00172100  | -2.57631500 | -2.33615700 |
| H  | 1.99746700  | -1.45288700 | -1.40418400 |
| H  | 0.79186900  | -0.83693000 | -2.54811300 |

|   |             |             |             |
|---|-------------|-------------|-------------|
| C | -2.07913000 | -1.98232500 | -2.36780100 |
| H | -2.12674100 | -3.04721300 | -2.62755500 |
| H | -1.47817600 | -1.47842800 | -3.12767000 |
| H | -3.08559700 | -1.56565800 | -2.39101500 |
| C | -3.59763700 | -2.21280800 | 0.45212500  |
| H | -3.76429300 | -3.29618200 | 0.41222800  |
| H | -4.20030100 | -1.73412000 | -0.31988200 |
| H | -3.93690200 | -1.85845900 | 1.42751600  |
| C | -2.14844100 | 2.63330600  | 0.48514700  |
| H | -1.97663700 | 3.49836100  | -0.16872900 |
| H | -2.87064200 | 2.92458300  | 1.25542200  |
| C | -0.86386500 | 2.10792700  | 1.12382300  |
| H | -0.82016200 | 1.99655400  | 2.20548100  |
| C | 0.28521800  | 1.98816800  | 0.36804100  |
| C | 1.66429700  | 1.78907600  | 0.93279800  |
| H | 1.63235300  | 1.08790600  | 1.77351500  |
| H | 1.96608400  | 2.75583100  | 1.36347400  |
| C | 2.70626400  | 1.36606800  | -0.10761900 |
| H | 2.35218600  | 0.46971700  | -0.62739500 |
| H | 2.78270100  | 2.14602300  | -0.87686300 |
| C | 4.08995000  | 1.10499300  | 0.49506200  |
| H | 4.00571200  | 0.35806000  | 1.29797600  |
| H | 4.45582800  | 2.02189700  | 0.97635000  |
| C | 5.11329900  | 0.62344700  | -0.53945400 |
| H | 4.74072400  | -0.29459800 | -1.01871200 |
| H | 5.19829700  | 1.36978000  | -1.34134600 |
| C | 6.49911600  | 0.35558500  | 0.05765700  |
| H | 6.41128100  | -0.38796600 | 0.86297700  |
| H | 6.87260700  | 1.27373500  | 0.53227800  |
| C | 7.52124500  | -0.13372200 | -0.97528000 |
| H | 7.14484000  | -1.05049300 | -1.44977800 |
| H | 7.60749200  | 0.61108100  | -1.77785700 |
| C | 8.90193200  | -0.39811600 | -0.36737900 |
| H | 8.84863700  | -1.16208600 | 0.41657900  |
| H | 9.61175900  | -0.74579600 | -1.12405100 |
| H | 9.31441100  | 0.51099300  | 0.08428200  |
| H | 0.24565100  | 2.32924300  | -0.66917700 |
| C | -4.65548700 | 2.58425300  | -0.96826600 |
| H | -4.10083200 | 3.42921800  | -1.38954200 |
| H | -4.98310300 | 2.87356900  | 0.03636600  |
| H | -5.53040000 | 2.38017900  | -1.58414900 |
| C | -3.80009700 | 1.33623200  | -0.91554200 |
| N | -2.57230800 | 1.43885400  | -0.24680100 |
| O | -4.13804400 | 0.28310400  | -1.43443900 |

**Ir-10'**

|    |             |             |             |
|----|-------------|-------------|-------------|
| Ir | 0.92327200  | -0.18828300 | -0.06844800 |
| C  | 1.28318400  | -2.36389200 | -0.09912000 |
| C  | -0.10629500 | -2.15885700 | 0.31621600  |
| C  | -0.08824500 | -1.41074600 | 1.52434200  |
| C  | 1.31065800  | -1.15400200 | 1.88853400  |
| C  | 2.14146500  | -1.81533400 | 0.92519900  |
| C  | 1.73285700  | -3.22662900 | -1.23846000 |
| H  | 1.86089000  | -4.25974600 | -0.89516000 |
| H  | 2.68924400  | -2.88857400 | -1.64323100 |
| H  | 1.00221400  | -3.23793800 | -2.04954800 |
| C  | -1.30738400 | -2.75072400 | -0.35268600 |
| H  | -1.50936300 | -3.74069800 | 0.07288000  |
| H  | -1.14888600 | -2.88233100 | -1.42443400 |
| H  | -2.19681800 | -2.13547000 | -0.21259900 |
| C  | -1.26258700 | -0.95810800 | 2.33225000  |
| H  | -1.25154800 | -1.45491700 | 3.30854800  |
| H  | -2.20813200 | -1.19080200 | 1.84087800  |
| H  | -1.21685800 | 0.12113700  | 2.50114900  |
| C  | 1.77719500  | -0.44632400 | 3.12238800  |
| H  | 1.98332900  | -1.16896000 | 3.92047200  |
| H  | 1.01393900  | 0.24617000  | 3.48236100  |
| H  | 2.68357400  | 0.12369400  | 2.91215800  |
| C  | 3.62884500  | -1.94007300 | 0.98108200  |
| H  | 3.88540300  | -2.85054200 | 1.53628400  |
| H  | 4.08151500  | -1.08603400 | 1.48339000  |
| H  | 4.06312100  | -2.02915000 | -0.01725900 |
| C  | 2.37121900  | 0.65103400  | -2.29263000 |
| H  | 2.44483400  | 1.51352400  | -2.96840700 |
| H  | 3.13739100  | -0.07442700 | -2.58582500 |
| C  | 0.99626400  | -0.00991400 | -2.31817100 |
| H  | 0.89211900  | -0.97475000 | -2.80791900 |
| C  | -0.14388400 | 0.69218000  | -1.93508700 |
| C  | -1.55576000 | 0.23463300  | -2.18954900 |
| H  | -1.57684000 | -0.84953800 | -2.34002200 |
| H  | -1.87750400 | 0.68222000  | -3.14144300 |
| C  | -2.54269000 | 0.64198500  | -1.08749700 |
| H  | -2.18030400 | 0.26009500  | -0.12612800 |
| H  | -2.54472500 | 1.73626500  | -0.99028600 |
| C  | -3.96932000 | 0.14619200  | -1.34000400 |
| H  | -3.95790500 | -0.94483300 | -1.48087200 |
| H  | -4.34318800 | 0.56628100  | -2.28334000 |
| C  | -4.93386500 | 0.49886000  | -0.20226700 |

|   |             |             |             |
|---|-------------|-------------|-------------|
| H | -4.55466200 | 0.07353200  | 0.73949200  |
| H | -4.94315800 | 1.58857500  | -0.05933700 |
| C | -6.36455900 | 0.00447200  | -0.44148800 |
| H | -6.35352200 | -1.08516100 | -0.58852200 |
| H | -6.74329500 | 0.43284700  | -1.37998600 |
| C | -7.32732700 | 0.35257600  | 0.69995100  |
| H | -6.94657200 | -0.07627700 | 1.63728700  |
| H | -7.33595000 | 1.44138300  | 0.84478900  |
| C | -8.75397500 | -0.14461300 | 0.44838100  |
| H | -8.77748600 | -1.23395500 | 0.33088500  |
| H | -9.42031800 | 0.11597500  | 1.27631500  |
| H | -9.16912800 | 0.29536200  | -0.46523000 |
| H | -0.03830100 | 1.76119100  | -1.75450800 |
| C | 4.93397000  | 1.35143100  | -1.10015400 |
| H | 4.74843200  | 2.03355400  | -1.93504900 |
| H | 5.23688600  | 0.38651300  | -1.52441300 |
| H | 5.74782200  | 1.73252700  | -0.48416100 |
| C | 3.70820100  | 1.16994000  | -0.22632600 |
| N | 2.48007500  | 1.01586900  | -0.86586000 |
| O | 3.76795000  | 1.20502200  | 0.99771900  |
| C | -0.23827800 | 3.83899400  | 1.61294000  |
| H | -1.11264400 | 3.43616500  | 2.12228900  |
| H | -0.51217600 | 4.68922500  | 0.98375700  |
| H | 0.48587900  | 4.19777500  | 2.35214400  |
| C | 0.41988900  | 2.78367500  | 0.77893800  |
| O | 0.09871200  | 1.57770300  | 0.91569300  |
| O | 1.31408000  | 3.19522600  | -0.06609500 |
| H | 1.80683600  | 2.37266200  | -0.47511600 |

### Ir-TS11'

|    |             |             |             |
|----|-------------|-------------|-------------|
| Ir | 0.91928700  | -0.17435900 | -0.06199900 |
| C  | 1.27420800  | -2.36402500 | -0.15161900 |
| C  | -0.11064600 | -2.14569700 | 0.26555500  |
| C  | -0.08507600 | -1.42594800 | 1.49538500  |
| C  | 1.31334200  | -1.19008100 | 1.86135900  |
| C  | 2.13598300  | -1.83967500 | 0.87774400  |
| C  | 1.71128500  | -3.20388200 | -1.31295900 |
| H  | 1.80541400  | -4.25093300 | -1.00244400 |
| H  | 2.68133900  | -2.88228400 | -1.69821700 |
| H  | 0.98944500  | -3.16788900 | -2.13132700 |
| C  | -1.31857800 | -2.71574600 | -0.40926600 |
| H  | -1.52731100 | -3.70966800 | 0.00382100  |
| H  | -1.16384100 | -2.83417600 | -1.48299500 |
| H  | -2.20207700 | -2.09517700 | -0.25737500 |

|   |             |             |             |
|---|-------------|-------------|-------------|
| C | -1.25489000 | -0.97932000 | 2.31277300  |
| H | -1.23374200 | -1.47795700 | 3.28780400  |
| H | -2.20317400 | -1.21471500 | 1.82817700  |
| H | -1.20997400 | 0.10020300  | 2.48144500  |
| C | 1.78738800  | -0.51444700 | 3.11013700  |
| H | 1.97290100  | -1.25413400 | 3.89753400  |
| H | 1.03640200  | 0.18885000  | 3.47464800  |
| H | 2.70676600  | 0.04114900  | 2.91881800  |
| C | 3.62263400  | -1.97717000 | 0.93063400  |
| H | 3.87114700  | -2.90444200 | 1.46102800  |
| H | 4.08354500  | -1.14426900 | 1.46055100  |
| H | 4.05900200  | -2.04363400 | -0.06870000 |
| C | 2.34998700  | 0.76018700  | -2.27072600 |
| H | 2.40843600  | 1.64657900  | -2.91451300 |
| H | 3.12409400  | 0.05624700  | -2.58518200 |
| C | 0.98535500  | 0.07999700  | -2.30663900 |
| H | 0.89564700  | -0.87119300 | -2.82538200 |
| C | -0.16148700 | 0.76122900  | -1.90966000 |
| C | -1.56871100 | 0.29772100  | -2.17332600 |
| H | -1.58290800 | -0.78231100 | -2.35170800 |
| H | -1.89279200 | 0.76731400  | -3.11391200 |
| C | -2.55784600 | 0.67404100  | -1.06206900 |
| H | -2.19320900 | 0.27338000  | -0.10945200 |
| H | -2.56489000 | 1.76541800  | -0.93941700 |
| C | -3.98165700 | 0.17698300  | -1.32745500 |
| H | -3.96539400 | -0.91022000 | -1.49545600 |
| H | -4.35727600 | 0.61843200  | -2.26031300 |
| C | -4.94828100 | 0.49700000  | -0.18185200 |
| H | -4.56815200 | 0.04929600  | 0.74907600  |
| H | -4.96147000 | 1.58258400  | -0.01117600 |
| C | -6.37696700 | 0.00370400  | -0.43485400 |
| H | -6.36200400 | -1.08174500 | -0.61005500 |
| H | -6.75666600 | 0.45489100  | -1.36222200 |
| C | -7.34169900 | 0.31878500  | 0.71448400  |
| H | -6.96027200 | -0.13317800 | 1.64061100  |
| H | -7.35383800 | 1.40337200  | 0.88773200  |
| C | -8.76658500 | -0.17611000 | 0.44881400  |
| H | -8.78661800 | -1.26205800 | 0.30260000  |
| H | -9.43432500 | 0.06048200  | 1.28281400  |
| H | -9.18251300 | 0.28651000  | -0.45319500 |
| H | -0.06515500 | 1.82369600  | -1.69255000 |
| C | 4.98123100  | 1.20876400  | -1.07389800 |
| H | 4.85613600  | 1.90612200  | -1.90735900 |
| H | 5.18936600  | 0.21949000  | -1.49888500 |

|   |             |            |             |
|---|-------------|------------|-------------|
| H | 5.82977300  | 1.50991700 | -0.46051500 |
| C | 3.75113900  | 1.14895400 | -0.19611000 |
| N | 2.48579000  | 1.09169700 | -0.83059800 |
| O | 3.80506700  | 1.19087500 | 1.02056800  |
| C | -0.19945400 | 3.79423100 | 1.65664200  |
| H | -1.10881100 | 3.40596600 | 2.11479100  |
| H | -0.41096900 | 4.69028600 | 1.06955600  |
| H | 0.51028100  | 4.07383600 | 2.44267200  |
| C | 0.44933400  | 2.75795300 | 0.78265900  |
| O | 0.10017800  | 1.54279700 | 0.93856300  |
| O | 1.31860700  | 3.14245300 | -0.06594900 |
| H | 1.91118400  | 2.18605400 | -0.50318300 |

**P-C1**

|   |             |             |             |
|---|-------------|-------------|-------------|
| C | -3.60336600 | -0.79978600 | 0.32048100  |
| H | -3.55644000 | -1.04838500 | 1.39161600  |
| H | -4.32631200 | -1.48545500 | -0.13298400 |
| C | -2.25237000 | -0.99674500 | -0.31156500 |
| H | -2.20631100 | -0.83259600 | -1.38826200 |
| C | -1.14904600 | -1.32974500 | 0.36161900  |
| C | 0.21576500  | -1.51240800 | -0.23832100 |
| H | 0.16304400  | -1.40606800 | -1.32912300 |
| H | 0.56650400  | -2.53627900 | -0.04099200 |
| C | 1.24977400  | -0.52253900 | 0.32900600  |
| H | 0.91398400  | 0.50229700  | 0.12285000  |
| H | 1.28260700  | -0.61869800 | 1.42333700  |
| C | 2.65574000  | -0.73043400 | -0.24308100 |
| H | 2.61965700  | -0.63891500 | -1.33793400 |
| H | 2.98396500  | -1.75898200 | -0.03564500 |
| C | 3.68893900  | 0.25445100  | 0.31423700  |
| H | 3.35962600  | 1.28240900  | 0.10634500  |
| H | 3.72367300  | 0.16339900  | 1.40928800  |
| C | 5.09606300  | 0.04785700  | -0.25618700 |
| H | 5.06166600  | 0.13872000  | -1.35140100 |
| H | 5.42561600  | -0.98039400 | -0.04855300 |
| C | 6.13080500  | 1.03229100  | 0.30030000  |
| H | 5.80067100  | 2.05906100  | 0.09175200  |
| H | 6.16399000  | 0.94080900  | 1.39453800  |
| C | 7.53312400  | 0.81654900  | -0.27592600 |
| H | 7.53357700  | 0.93409300  | -1.36564500 |
| H | 8.25265200  | 1.53106300  | 0.13683400  |
| H | 7.89941000  | -0.19230500 | -0.05368500 |
| H | -1.21658100 | -1.46993600 | 1.44269400  |
| C | -6.44450300 | -0.04443600 | -0.22621100 |

|   |             |             |             |
|---|-------------|-------------|-------------|
| H | -6.50356900 | -0.70085400 | 0.64835200  |
| H | -6.25771000 | -0.67359500 | -1.10317300 |
| H | -7.39474000 | 0.47286400  | -0.35318800 |
| C | -5.36176500 | 1.01262000  | -0.06080700 |
| N | -4.07563400 | 0.56536200  | 0.11106500  |
| O | -5.61318000 | 2.21056500  | -0.09490900 |
| H | -3.40905600 | 1.30964200  | 0.27352600  |

**<sup>1</sup>[Cp\*CoCl<sub>2</sub>]<sub>2</sub>**

|    |             |             |             |
|----|-------------|-------------|-------------|
| Co | -1.63591900 | -0.22029000 | -0.00001800 |
| Co | 1.63596900  | 0.22039600  | 0.00002000  |
| Cl | 0.00001600  | -0.00002100 | 1.63071600  |
| Cl | -0.00000600 | 0.00041400  | -1.63071400 |
| Cl | -1.55656500 | -2.47587500 | -0.00032900 |
| Cl | 1.55702500  | 2.47599500  | 0.00031700  |
| C  | 2.56281300  | -1.56558200 | -0.70705900 |
| C  | 2.56282100  | -1.56576700 | 0.70662100  |
| C  | 3.24724000  | -0.36896100 | 1.15707600  |
| C  | 3.24723000  | -0.36866100 | -1.15720900 |
| C  | 3.74678800  | 0.30944900  | 0.00001900  |
| C  | -3.24730100 | 0.36876100  | -1.15707300 |
| C  | -3.74672300 | -0.30972800 | -0.00000600 |
| C  | -3.24728500 | 0.36848400  | 1.15721300  |
| C  | -2.56310500 | 1.56569900  | -0.70663200 |
| C  | -2.56309000 | 1.56552600  | 0.70704900  |
| C  | -1.93523600 | 2.62082500  | 1.56141900  |
| H  | -0.92834700 | 2.85563700  | 1.20589200  |
| H  | -2.54209400 | 3.53400900  | 1.52441400  |
| H  | -1.85697300 | 2.30080000  | 2.60072600  |
| C  | -1.93525800 | 2.62120600  | -1.56074900 |
| H  | -2.54211200 | 3.53438300  | -1.52351100 |
| H  | -0.92836300 | 2.85592500  | -1.20517600 |
| H  | -1.85700800 | 2.30143800  | -2.60013700 |
| C  | -3.45179600 | -0.04207900 | -2.58189000 |
| H  | -4.35881000 | 0.41297900  | -2.99820800 |
| H  | -2.60220700 | 0.26391900  | -3.19592200 |
| H  | -3.54271100 | -1.12721500 | -2.66148300 |
| C  | -4.60924100 | -1.52928700 | -0.00014100 |
| H  | -5.66317000 | -1.22245400 | 0.00002700  |
| H  | -4.42473000 | -2.14641100 | -0.87960000 |
| H  | -4.42454100 | -2.14673600 | 0.87905100  |
| C  | -3.45177300 | -0.04267200 | 2.58193900  |
| H  | -4.35868000 | 0.41245200  | 2.99841700  |
| H  | -3.54288700 | -1.12781000 | 2.66127800  |

|   |             |             |             |
|---|-------------|-------------|-------------|
| H | -2.60209500 | 0.26302500  | 3.19599900  |
| C | 1.93476800  | -2.62075500 | -1.56144200 |
| H | 2.54149100  | -3.53403100 | -1.52449500 |
| H | 0.92785600  | -2.85542700 | -1.20588600 |
| H | 1.85651200  | -2.30068000 | -2.60073500 |
| C | 3.45179700  | 0.04247600  | -2.58193000 |
| H | 4.35864500  | -0.41277400 | -2.99839900 |
| H | 2.60208400  | -0.26309500 | -3.19600400 |
| H | 3.54306600  | 1.12760200  | -2.66125800 |
| C | 1.93477600  | -2.62116200 | 1.56073100  |
| H | 0.92784700  | -2.85570800 | 1.20514000  |
| H | 2.54147200  | -3.53444400 | 1.52351100  |
| H | 1.85656000  | -2.30137400 | 2.60011500  |
| C | 3.45180900  | 0.04182400  | 2.58189800  |
| H | 2.60214700  | -0.26399300 | 3.19592000  |
| H | 4.35871800  | -0.41343700 | 2.99822200  |
| H | 3.54296300  | 1.12693900  | 2.66150100  |
| C | 4.60952600  | 1.52885300  | 0.00017400  |
| H | 4.42500900  | 2.14630100  | -0.87905700 |
| H | 4.42505400  | 2.14604400  | 0.87959500  |
| H | 5.66340000  | 1.22183100  | 0.00010400  |

**<sup>3</sup>[Cp\*CoCl<sub>2</sub>]<sub>2</sub>**

|    |             |             |             |
|----|-------------|-------------|-------------|
| Co | 1.61170600  | 0.42932400  | 0.00154100  |
| Co | -1.69662300 | -0.23565200 | -0.00019400 |
| Cl | -0.08528000 | -0.01936600 | 1.65612400  |
| Cl | -0.08510800 | -0.01805000 | -1.65529300 |
| Cl | 1.69581300  | 2.66488600  | -0.00169200 |
| Cl | -1.60067600 | -2.49118400 | -0.00185700 |
| C  | -2.62053400 | 1.55093200  | -0.70683200 |
| C  | -2.61998500 | 1.55116900  | 0.70635200  |
| C  | -3.30913700 | 0.35724400  | 1.15772200  |
| C  | -3.30958100 | 0.35664100  | -1.15724100 |
| C  | -3.80783600 | -0.32140700 | 0.00059600  |
| C  | 3.37129400  | -0.49606300 | -1.18250600 |
| C  | 3.82752500  | 0.21360900  | 0.00316500  |
| C  | 3.36830300  | -0.49904200 | 1.18411000  |
| C  | 2.63968600  | -1.60210400 | -0.74393500 |
| C  | 2.63705900  | -1.60393100 | 0.73916700  |
| C  | 1.95226300  | -2.65891000 | 1.53844600  |
| H  | 0.90127400  | -2.74086200 | 1.23934400  |
| H  | 2.42778600  | -3.63195900 | 1.35995700  |
| H  | 1.98733900  | -2.44565800 | 2.60732900  |
| C  | 1.95648100  | -2.65467300 | -1.54801300 |



|   |             |             |             |
|---|-------------|-------------|-------------|
| H | 2.43203600  | -3.62824400 | -1.37257300 |
| H | 0.90505000  | -2.73788400 | -1.25093200 |
| H | 1.99300100  | -2.43745400 | -2.61607200 |
| C | 3.64136800  | -0.06188100 | -2.59215300 |
| H | 4.68821200  | -0.23338700 | -2.87059000 |
| H | 3.00857200  | -0.60407500 | -3.29708600 |
| H | 3.43328200  | 1.00541800  | -2.71540700 |
| C | 4.76293200  | 1.37409100  | 0.00498900  |
| H | 5.79817100  | 1.00512900  | 0.00031500  |
| H | 4.61763800  | 2.00185800  | -0.87537600 |
| H | 4.62325000  | 1.99517200  | 0.89095800  |
| C | 3.63367600  | -0.07147000 | 2.59679400  |
| H | 4.67515800  | -0.26026000 | 2.88404700  |
| H | 3.44136500  | 0.99865400  | 2.72046500  |
| H | 2.98609000  | -0.60457000 | 3.29524800  |
| C | -1.98744500 | 2.60431800  | -1.56067600 |
| H | -2.60018000 | 3.51407100  | -1.53989800 |
| H | -0.98740900 | 2.85163100  | -1.19410100 |
| H | -1.89081200 | 2.27601100  | -2.59557900 |
| C | -3.51809500 | -0.05071200 | -2.58230100 |
| H | -4.41834400 | 0.41724100  | -2.99907600 |
| H | -2.66266800 | 0.24289500  | -3.19409900 |
| H | -3.62430800 | -1.13435700 | -2.66282500 |
| C | -1.98619200 | 2.60480400  | 1.55939400  |
| H | -0.98628300 | 2.85169600  | 1.19217300  |
| H | -2.59865200 | 3.51473500  | 1.53857400  |
| H | -1.88908600 | 2.27691400  | 2.59438800  |
| C | -3.51714300 | -0.04915700 | 2.58312900  |
| H | -2.66108100 | 0.24394800  | 3.19428200  |
| H | -4.41666200 | 0.41996700  | 3.00016000  |
| H | -3.62448900 | -1.13263600 | 2.66436800  |
| C | -4.66603600 | -1.54428800 | 0.00113000  |
| H | -4.47878900 | -2.16083300 | -0.87820900 |
| H | -4.47748800 | -2.16098300 | 0.88009400  |
| H | -5.72154200 | -1.24319100 | 0.00194000  |

**<sup>5</sup>[Cp\*CoCl<sub>2</sub>]<sub>2</sub>**

|    |             |             |             |
|----|-------------|-------------|-------------|
| Co | -1.55075500 | 0.47040600  | -0.00062300 |
| Co | 1.70785700  | -0.24309100 | 0.00000600  |
| Cl | 0.08073400  | -0.06573600 | -1.65814100 |
| Cl | 0.08054800  | -0.06508500 | 1.65775100  |
| Cl | -1.77389900 | 2.71047800  | -0.00036900 |
| Cl | 1.66105900  | -2.49342600 | 0.00036800  |
| C  | 2.58895700  | 1.56492900  | 0.70632100  |

|   |             |             |             |
|---|-------------|-------------|-------------|
| C | 2.58901200  | 1.56471300  | -0.70677800 |
| C | 3.30295000  | 0.38448400  | -1.15737900 |
| C | 3.30281800  | 0.38481500  | 1.15733300  |
| C | 3.81732300  | -0.28228200 | 0.00009400  |
| C | -3.36567400 | -0.50026700 | 1.16911100  |
| C | -3.87563500 | 0.17481900  | 0.00045200  |
| C | -3.36637200 | -0.50117700 | -1.16840800 |
| C | -2.64052100 | -1.63246600 | 0.72771100  |
| C | -2.64087000 | -1.63285200 | -0.72692000 |
| C | -1.96105200 | -2.67724500 | -1.54859200 |
| H | -0.91737700 | -2.79544700 | -1.23785200 |
| H | -2.46146300 | -3.64540000 | -1.41513100 |
| H | -1.97282200 | -2.42959600 | -2.61097400 |
| C | -1.96051400 | -2.67649100 | 1.54961500  |
| H | -2.46103200 | -3.64466900 | 1.41668000  |
| H | -0.91695400 | -2.79491300 | 1.23854600  |
| H | -1.97192300 | -2.42839000 | 2.61189000  |
| C | -3.62098200 | -0.09334200 | 2.58992300  |
| H | -4.58019700 | -0.48217900 | 2.95416100  |
| H | -2.83358800 | -0.46534600 | 3.24938100  |
| H | -3.64388700 | 0.99559300  | 2.68652100  |
| C | -4.81586000 | 1.33420500  | 0.00020900  |
| H | -5.85428900 | 0.97534800  | -0.00020700 |
| H | -4.67346800 | 1.96224000  | 0.88152100  |
| H | -4.67283600 | 1.96238600  | -0.88090500 |
| C | -3.62275400 | -0.09479200 | -2.58916300 |
| H | -4.58306900 | -0.48233700 | -2.95188900 |
| H | -3.64411700 | 0.99412100  | -2.68646400 |
| H | -2.83682500 | -0.46850400 | -3.24939000 |
| C | 1.93667200  | 2.60474400  | 1.56249500  |
| H | 2.54410800  | 3.51818100  | 1.56052200  |
| H | 0.94061300  | 2.85318200  | 1.18618700  |
| H | 1.82819700  | 2.26499100  | 2.59249900  |
| C | 3.51913000  | -0.02028700 | 2.58180500  |
| H | 4.42048100  | 0.45035100  | 2.99298500  |
| H | 2.66690500  | 0.27159700  | 3.19869700  |
| H | 3.62850900  | -1.10363600 | 2.66207300  |
| C | 1.93678800  | 2.60426600  | -1.56331800 |
| H | 0.94072800  | 2.85286700  | -1.18711700 |
| H | 2.54425000  | 3.51768600  | -1.56163100 |
| H | 1.82833400  | 2.26417900  | -2.59321400 |
| C | 3.51942200  | -0.02102000 | -2.58171200 |
| H | 2.66727700  | 0.27070400  | -3.19879200 |
| H | 4.42082700  | 0.44949100  | -2.99291800 |

|   |            |             |             |
|---|------------|-------------|-------------|
| H | 3.62880000 | -1.10439300 | -2.66166700 |
| C | 4.70444200 | -1.48402300 | 0.00031300  |
| H | 4.53190700 | -2.10461600 | 0.87973600  |
| H | 4.53195500 | -2.10489900 | -0.87892000 |
| H | 5.75202600 | -1.15639400 | 0.00028900  |

**<sup>1</sup>Cp\*Co(OAc)<sub>2</sub>**

|    |             |             |             |
|----|-------------|-------------|-------------|
| Co | 0.10482500  | 0.16856300  | -0.12491800 |
| C  | 1.03498800  | -1.40947600 | -1.04754500 |
| C  | 0.26771400  | -1.91337000 | 0.06079400  |
| C  | 0.72888800  | -1.27529400 | 1.24467300  |
| C  | 1.84206300  | -0.41590300 | 0.88411600  |
| C  | 2.04963500  | -0.53330200 | -0.51572500 |
| C  | 0.84334900  | -1.76710800 | -2.48951900 |
| H  | 1.30284300  | -2.73439400 | -2.72713900 |
| H  | 1.28792700  | -1.01127600 | -3.14118700 |
| H  | -0.22112800 | -1.82696400 | -2.72975600 |
| C  | -0.85661700 | -2.89409200 | -0.03478000 |
| H  | -0.46068800 | -3.91679100 | -0.00706000 |
| H  | -1.40101100 | -2.76725100 | -0.97316200 |
| H  | -1.56242000 | -2.75742700 | 0.78373600  |
| C  | 0.14532500  | -1.43655600 | 2.61411700  |
| H  | 0.32295900  | -2.44890500 | 2.99548300  |
| H  | -0.93142500 | -1.25497400 | 2.56824400  |
| H  | 0.58692100  | -0.72606500 | 3.31568100  |
| C  | 2.56993700  | 0.47248400  | 1.84724400  |
| H  | 3.10048800  | -0.11974200 | 2.60080500  |
| H  | 1.86073600  | 1.12601400  | 2.36380200  |
| H  | 3.29928000  | 1.10563000  | 1.33809600  |
| C  | 3.02829800  | 0.22595500  | -1.35795600 |
| H  | 3.70459000  | 0.82779800  | -0.74858100 |
| H  | 2.49846100  | 0.90034000  | -2.03739500 |
| H  | 3.62984100  | -0.46500100 | -1.95773900 |
| O  | 0.37151300  | 1.88788300  | -1.08141400 |
| O  | -0.31245100 | 1.76923400  | 0.97797500  |
| C  | -0.06208400 | 2.48896300  | -0.04261200 |
| C  | -0.31488500 | 3.96806500  | -0.04104100 |
| H  | -1.34847000 | 4.14111500  | -0.35918900 |
| H  | -0.19260000 | 4.37179300  | 0.96554900  |
| H  | 0.35164600  | 4.46849600  | -0.74567900 |
| C  | -4.00749900 | 0.05929100  | -0.68374400 |
| H  | -4.80788700 | -0.31416700 | -0.04376600 |
| H  | -4.03545100 | -0.43713700 | -1.65789500 |
| H  | -4.15104500 | 1.12996500  | -0.86169000 |

|   |             |             |             |
|---|-------------|-------------|-------------|
| C | -2.65615900 | -0.16140900 | -0.01351600 |
| O | -1.65353600 | 0.10296300  | -0.81330800 |
| O | -2.57322100 | -0.54654800 | 1.15232200  |

**<sup>3</sup>Cp\*Co(OAc)<sub>2</sub>**

|    |             |             |             |
|----|-------------|-------------|-------------|
| Co | -0.00481400 | 0.34444200  | -0.02815100 |
| C  | -0.70366400 | -1.81816000 | -0.81418000 |
| C  | -1.12577400 | -1.50917800 | 0.57682000  |
| C  | 0.02573500  | -1.38220000 | 1.38527200  |
| C  | 1.15035700  | -1.50034900 | 0.50945300  |
| C  | 0.67639800  | -1.82091800 | -0.84772600 |
| C  | -1.66958000 | -1.98921000 | -1.94130200 |
| H  | -2.42086900 | -2.75196500 | -1.70642700 |
| H  | -1.16332400 | -2.27874300 | -2.86411600 |
| H  | -2.19092500 | -1.04238100 | -2.12251600 |
| C  | -2.55254900 | -1.45383600 | 1.01185700  |
| H  | -2.92894300 | -2.46456900 | 1.21782100  |
| H  | -3.17773700 | -1.02333400 | 0.22512900  |
| H  | -2.67044400 | -0.84611300 | 1.90956700  |
| C  | 0.09201100  | -1.07505400 | 2.85195100  |
| H  | 0.43419500  | -1.94217900 | 3.42932600  |
| H  | -0.88591800 | -0.77666100 | 3.23412100  |
| H  | 0.78097300  | -0.24527800 | 3.03482200  |
| C  | 2.58671500  | -1.43324100 | 0.90556300  |
| H  | 2.95530100  | -2.43499300 | 1.16428600  |
| H  | 2.72510500  | -0.77897200 | 1.76749900  |
| H  | 3.19875300  | -1.05660400 | 0.08209300  |
| C  | 1.58819100  | -1.98929900 | -2.02184500 |
| H  | 2.34282600  | -2.76081400 | -1.83040700 |
| H  | 2.10753100  | -1.04604300 | -2.22362200 |
| H  | 1.03588200  | -2.26952300 | -2.92101000 |
| O  | 1.53970400  | 1.15471800  | -1.21433300 |
| O  | 1.50074200  | 1.48223300  | 0.95547100  |
| C  | 2.04310600  | 1.68803500  | -0.17336700 |
| C  | 3.25580800  | 2.58089600  | -0.28885400 |
| H  | 2.91713400  | 3.61080300  | -0.44384100 |
| H  | 3.84118800  | 2.54976300  | 0.63190500  |
| H  | 3.86455500  | 2.28954900  | -1.14677700 |
| C  | -3.27391200 | 2.56743300  | -0.31200300 |
| H  | -3.83425700 | 2.61513900  | 0.62304900  |
| H  | -3.90481500 | 2.20179500  | -1.12490600 |
| H  | -2.94365200 | 3.57886600  | -0.57140700 |
| C  | -2.05583400 | 1.68808700  | -0.15508500 |
| O  | -1.52554400 | 1.15347800  | -1.18773300 |

|                                           |             |             |             |
|-------------------------------------------|-------------|-------------|-------------|
| 0                                         | -1.53673200 | 1.49136000  | 0.98111500  |
| <b><sup>5</sup>Cp*Co(OAc)<sub>2</sub></b> |             |             |             |
| Co                                        | -0.00353000 | -0.55592000 | -0.06953600 |
| C                                         | 0.68773300  | 1.87199600  | -0.72487100 |
| C                                         | 1.15044700  | 1.47739500  | 0.60513400  |
| C                                         | 0.01414500  | 1.21424200  | 1.42276800  |
| C                                         | -1.13779200 | 1.48869600  | 0.63129700  |
| C                                         | -0.70144300 | 1.87893100  | -0.70878400 |
| C                                         | 1.60695200  | 2.13735000  | -1.87507700 |
| H                                         | 2.34741200  | 2.90582900  | -1.62303000 |
| H                                         | 1.06082900  | 2.47251200  | -2.75933100 |
| H                                         | 2.14878800  | 1.22223500  | -2.13954400 |
| C                                         | 2.58328100  | 1.39424900  | 1.01513000  |
| H                                         | 2.93472300  | 2.36198700  | 1.39813300  |
| H                                         | 3.21729700  | 1.12987800  | 0.16397800  |
| H                                         | 2.72721400  | 0.64618000  | 1.79712800  |
| C                                         | 0.02948900  | 0.80867000  | 2.86788800  |
| H                                         | 0.04434600  | 1.67908400  | 3.53578900  |
| H                                         | 0.90696000  | 0.19535200  | 3.08728300  |
| H                                         | -0.85087100 | 0.20817500  | 3.10986000  |
| C                                         | -2.56209500 | 1.42035100  | 1.07147900  |
| H                                         | -2.90457800 | 2.40135100  | 1.42826400  |
| H                                         | -2.69325200 | 0.69847800  | 1.87944800  |
| H                                         | -3.21331000 | 1.12989600  | 0.24192900  |
| C                                         | -1.64448800 | 2.15179800  | -1.83758900 |
| H                                         | -2.37908300 | 2.91883900  | -1.56509400 |
| H                                         | -2.19200900 | 1.23813300  | -2.09550600 |
| H                                         | -1.11734000 | 2.49195200  | -2.73141500 |
| O                                         | -1.65459500 | -1.03431700 | -1.25089000 |
| O                                         | -1.61466700 | -1.56935000 | 0.87868300  |
| C                                         | -2.20207800 | -1.60425100 | -0.24710500 |
| C                                         | -3.51560500 | -2.32503800 | -0.41260400 |
| H                                         | -3.31664800 | -3.32964100 | -0.80078600 |
| H                                         | -4.02572700 | -2.41682600 | 0.54719000  |
| H                                         | -4.14250900 | -1.80371200 | -1.13892300 |
| C                                         | 3.53459000  | -2.28105800 | -0.39401600 |
| H                                         | 4.30271200  | -1.57919600 | -0.05062400 |
| H                                         | 3.73446500  | -2.53706100 | -1.43525600 |
| H                                         | 3.58334800  | -3.16756000 | 0.24117500  |
| C                                         | 2.18675400  | -1.61994900 | -0.25829100 |
| O                                         | 1.64559700  | -1.04476500 | -1.26094300 |
| O                                         | 1.59156800  | -1.59361100 | 0.86498100  |

**<sup>1</sup>Cp\*Co(OAc)(NTf<sub>2</sub>)**

|    |             |             |             |
|----|-------------|-------------|-------------|
| Co | -1.29319700 | -0.05276900 | -0.08592200 |
| C  | -1.64183500 | -1.26031900 | 1.61241600  |
| C  | -1.69876700 | -2.07093500 | 0.41058900  |
| C  | -2.72688500 | -1.54707400 | -0.41973600 |
| C  | -3.27431800 | -0.38179600 | 0.22378800  |
| C  | -2.62296000 | -0.24017000 | 1.50681300  |
| C  | -0.73064200 | -1.50362300 | 2.77286500  |
| H  | -1.10951300 | -2.34548000 | 3.36547800  |
| H  | -0.65711800 | -0.62512400 | 3.41196200  |
| H  | 0.27552100  | -1.75374200 | 2.43595500  |
| C  | -0.89146300 | -3.30493900 | 0.15206400  |
| H  | -1.46717400 | -4.19067600 | 0.44754700  |
| H  | 0.03282900  | -3.30045400 | 0.72786900  |
| H  | -0.62343300 | -3.39326800 | -0.90054400 |
| C  | -3.08167300 | -2.00987100 | -1.79735200 |
| H  | -4.13349600 | -2.31309000 | -1.83849400 |
| H  | -2.46206500 | -2.85192700 | -2.10653900 |
| H  | -2.92808800 | -1.19852700 | -2.51514200 |
| C  | -4.34398600 | 0.50734000  | -0.33143600 |
| H  | -5.32697000 | 0.24614900  | 0.07685900  |
| H  | -4.39470800 | 0.41786200  | -1.41888700 |
| H  | -4.14099600 | 1.55295900  | -0.08757800 |
| C  | -2.83179400 | 0.86690500  | 2.49220600  |
| H  | -3.30001500 | 0.48177600  | 3.40510000  |
| H  | -3.47189600 | 1.64846200  | 2.08101700  |
| H  | -1.87162800 | 1.31675500  | 2.75636400  |
| O  | -1.39183000 | 1.91616000  | -0.19396500 |
| O  | -1.32912000 | 0.64098700  | -1.94061700 |
| C  | -1.37784000 | 1.82355600  | -1.46961200 |
| C  | -1.39276200 | 3.03725700  | -2.34461300 |
| H  | -0.41012900 | 3.51229100  | -2.28567900 |
| H  | -1.60116000 | 2.75878400  | -3.37799500 |
| H  | -2.13525700 | 3.74935700  | -1.97655800 |
| N  | 0.69061200  | -0.03273700 | 0.03062600  |
| S  | 1.45662700  | 0.97435900  | 1.10895400  |
| S  | 1.60149700  | -0.81245300 | -1.13593000 |
| O  | 0.51997300  | 1.24957000  | 2.19865800  |
| O  | 2.81270500  | 0.49909300  | 1.37902000  |
| O  | 0.65966700  | -1.60297800 | -1.92749200 |
| O  | 2.58677200  | 0.05895600  | -1.76948700 |
| C  | 2.62188900  | -2.10010800 | -0.16917700 |
| C  | 1.67796000  | 2.64046200  | 0.20781800  |
| F  | 2.12201000  | -2.29718900 | 1.06285100  |

|   |            |             |             |
|---|------------|-------------|-------------|
| F | 2.54972300 | -3.25448800 | -0.83994700 |
| F | 3.88545600 | -1.71941000 | -0.07696900 |
| F | 0.84732700 | 3.54322800  | 0.72444800  |
| F | 2.93325400 | 3.04726000  | 0.37505100  |
| F | 1.42917200 | 2.51581100  | -1.10236100 |

**<sup>3</sup>Cp\*Co(OAc)(NTf<sub>2</sub>)**

|    |             |             |             |
|----|-------------|-------------|-------------|
| Co | -1.24100600 | 0.07121500  | 0.02410100  |
| C  | -1.68447100 | -1.49253600 | 1.54902700  |
| C  | -1.71146500 | -2.19066700 | 0.23533000  |
| C  | -2.73122600 | -1.63525400 | -0.54435000 |
| C  | -3.31774100 | -0.56503400 | 0.22717200  |
| C  | -2.69637700 | -0.52810400 | 1.54927400  |
| C  | -0.72929100 | -1.83514200 | 2.64649600  |
| H  | -0.98569300 | -2.80559000 | 3.08903900  |
| H  | -0.73652200 | -1.07890800 | 3.43134100  |
| H  | 0.29116700  | -1.90648400 | 2.26161200  |
| C  | -0.82597500 | -3.33705300 | -0.12442800 |
| H  | -1.29373500 | -4.27857500 | 0.19310800  |
| H  | 0.14140100  | -3.26552900 | 0.37152200  |
| H  | -0.64596000 | -3.37913300 | -1.19878200 |
| C  | -3.09700500 | -1.97155500 | -1.95797300 |
| H  | -4.16065900 | -2.22028700 | -2.04169000 |
| H  | -2.51944700 | -2.82203700 | -2.32344100 |
| H  | -2.88568700 | -1.12018000 | -2.61250500 |
| C  | -4.44523300 | 0.30562600  | -0.21304400 |
| H  | -5.39295500 | -0.07627800 | 0.18847600  |
| H  | -4.52203600 | 0.32813000  | -1.30214800 |
| H  | -4.30738000 | 1.32658900  | 0.14905400  |
| C  | -3.05595100 | 0.45227500  | 2.62376600  |
| H  | -4.05350800 | 0.24540500  | 3.02848000  |
| H  | -3.05412900 | 1.47063900  | 2.22368000  |
| H  | -2.33629800 | 0.42138900  | 3.44248000  |
| O  | -1.82171600 | 1.95992100  | -0.29782700 |
| O  | -1.32266500 | 0.75010400  | -2.05429900 |
| C  | -1.65451000 | 1.86556500  | -1.57023800 |
| C  | -1.80997700 | 3.09364000  | -2.42513200 |
| H  | -0.89402500 | 3.68565100  | -2.32889600 |
| H  | -1.94508500 | 2.81754400  | -3.47135700 |
| H  | -2.64306200 | 3.70404500  | -2.07007200 |
| N  | 0.78320300  | -0.08395100 | 0.01940400  |
| S  | 1.31506900  | 0.93175600  | 1.20007800  |
| S  | 1.76763400  | -0.68507700 | -1.17474700 |
| O  | 0.08234100  | 1.18705300  | 1.97052500  |

|   |            |             |             |
|---|------------|-------------|-------------|
| O | 2.54199000 | 0.49336200  | 1.85783200  |
| O | 0.92612200 | -1.52993600 | -2.01656300 |
| O | 2.65328100 | 0.33835300  | -1.72422800 |
| C | 2.90429200 | -1.88575200 | -0.25156500 |
| C | 1.73623700 | 2.57461700  | 0.35203300  |
| F | 2.26981200 | -2.41839400 | 0.80836500  |
| F | 3.22684800 | -2.86858100 | -1.09456600 |
| F | 4.00360800 | -1.27033900 | 0.15939300  |
| F | 1.40499500 | 3.55989500  | 1.18715900  |
| F | 3.03593600 | 2.62326600  | 0.09212400  |
| F | 1.04573900 | 2.70492900  | -0.78397000 |

**<sup>5</sup>Cp\*Co(OAc)(NTf<sub>2</sub>)**

|    |             |             |             |
|----|-------------|-------------|-------------|
| Co | -1.19392600 | 0.25291000  | 0.04626600  |
| C  | -1.57400100 | -1.58397000 | 1.58071100  |
| C  | -1.60239300 | -2.29442300 | 0.33135500  |
| C  | -2.65793000 | -1.77960200 | -0.43360000 |
| C  | -3.30740300 | -0.71221600 | 0.33679900  |
| C  | -2.62757100 | -0.58010600 | 1.56534900  |
| C  | -0.61313200 | -1.82727700 | 2.69683900  |
| H  | -0.88445600 | -2.73975900 | 3.24413100  |
| H  | -0.59956700 | -0.99593400 | 3.40222600  |
| H  | 0.40270800  | -1.96561400 | 2.31658100  |
| C  | -0.68859700 | -3.41132700 | -0.07978300 |
| H  | -1.25159800 | -4.34401700 | -0.20264500 |
| H  | 0.08950400  | -3.58780600 | 0.66275700  |
| H  | -0.19748900 | -3.18721200 | -1.03039800 |
| C  | -3.04680800 | -2.17352600 | -1.81833800 |
| H  | -4.11365500 | -2.42104200 | -1.87375900 |
| H  | -2.47163500 | -3.03406500 | -2.16497700 |
| H  | -2.86133100 | -1.33978000 | -2.50517500 |
| C  | -4.49376100 | 0.05829600  | -0.14402500 |
| H  | -5.41469700 | -0.52224400 | -0.00361000 |
| H  | -4.40131400 | 0.27321600  | -1.21258300 |
| H  | -4.60138900 | 1.00430600  | 0.38906200  |
| C  | -2.97204300 | 0.34003900  | 2.69974100  |
| H  | -3.54947300 | -0.18208200 | 3.47236500  |
| H  | -3.56444500 | 1.18729600  | 2.34776100  |
| H  | -2.06892300 | 0.74424200  | 3.16244400  |
| O  | -1.94590200 | 2.11574300  | -0.31152900 |
| O  | -1.69317200 | 0.70727700  | -1.97558600 |
| C  | -1.98699000 | 1.87330100  | -1.57007600 |
| C  | -2.34258300 | 2.97138300  | -2.53349300 |
| H  | -1.47936500 | 3.63912000  | -2.62471400 |



|   |             |             |             |
|---|-------------|-------------|-------------|
| H | -2.58195400 | 2.56139400  | -3.51497400 |
| H | -3.17568500 | 3.55882300  | -2.14096100 |
| N | 0.83605100  | -0.01930200 | -0.07651800 |
| S | 1.34204600  | 0.94372600  | 1.15218800  |
| S | 1.84054000  | -0.62287600 | -1.25678000 |
| O | 0.05029000  | 1.18128600  | 1.85024200  |
| O | 2.51672400  | 0.48169900  | 1.88116100  |
| O | 0.99398400  | -1.40384300 | -2.15201500 |
| O | 2.76753900  | 0.39517400  | -1.74400900 |
| C | 2.90605800  | -1.88029600 | -0.32767400 |
| C | 1.78979300  | 2.61317500  | 0.38554400  |
| F | 2.21794600  | -2.41610300 | 0.69189400  |
| F | 3.23687500  | -2.84748800 | -1.18349500 |
| F | 4.00206600  | -1.29725600 | 0.13946700  |
| F | 1.53311100  | 3.55676500  | 1.29043100  |
| F | 3.07544300  | 2.63199300  | 0.06469100  |
| F | 1.04294800  | 2.81928200  | -0.70141500 |

**<sup>1</sup>[Cp\*Co(NTf<sub>2</sub>)]<sup>+</sup>**

|    |            |             |             |
|----|------------|-------------|-------------|
| Co | 1.13788900 | -0.10560100 | -0.23042400 |
| C  | 2.14215900 | -0.75466600 | 1.43519100  |
| C  | 2.90848200 | 0.23593400  | 0.69352200  |
| C  | 3.14893800 | -0.26919400 | -0.62230900 |
| C  | 2.49392100 | -1.54359400 | -0.71816100 |
| C  | 1.88800200 | -1.85268800 | 0.56496600  |
| C  | 1.67393000 | -0.60567100 | 2.84452900  |
| H  | 2.39997200 | -1.08220700 | 3.51515400  |
| H  | 0.70313700 | -1.07861300 | 2.99508100  |
| H  | 1.59812300 | 0.44457800  | 3.13238500  |
| C  | 3.30395500 | 1.57808200  | 1.21587300  |
| H  | 4.08846000 | 1.46384000  | 1.97328200  |
| H  | 2.45814300 | 2.07974700  | 1.69492500  |
| H  | 3.68426700 | 2.22313500  | 0.42338600  |
| C  | 3.84508600 | 0.47120200  | -1.72140600 |
| H  | 4.92107000 | 0.51032200  | -1.52026300 |
| H  | 3.47750800 | 1.49797600  | -1.79649500 |
| H  | 3.70018400 | -0.00945000 | -2.68916600 |
| C  | 2.38092500 | -2.39507100 | -1.93744600 |
| H  | 3.17040700 | -3.15753500 | -1.92146800 |
| H  | 2.49416800 | -1.81463900 | -2.85425600 |
| H  | 1.42240000 | -2.91807100 | -1.96976300 |
| C  | 1.14887300 | -3.10880600 | 0.89477400  |
| H  | 1.87286600 | -3.90417100 | 1.10860100  |
| H  | 0.52576200 | -3.44007300 | 0.06246100  |

|   |             |             |             |
|---|-------------|-------------|-------------|
| H | 0.50541800  | -2.97923200 | 1.76349300  |
| N | -0.74128400 | 0.04528700  | -0.06965300 |
| S | -2.02000700 | -0.62944300 | 0.81982800  |
| S | -0.83352400 | 1.42924600  | -0.96023500 |
| O | -1.40495000 | -1.42302400 | 1.87462700  |
| O | -3.02437700 | 0.39370300  | 1.06271200  |
| O | 0.63756400  | 1.39593000  | -1.39083700 |
| O | -1.87401600 | 1.58388300  | -1.95037100 |
| C | -0.89932600 | 2.88274200  | 0.26247300  |
| C | -2.67143700 | -1.83026000 | -0.47179200 |
| F | -0.18574200 | 2.54091200  | 1.34283800  |
| F | -0.34215600 | 3.92017100  | -0.34033800 |
| F | -2.14797600 | 3.12654100  | 0.58720400  |
| F | -1.66436700 | -2.63842600 | -0.83331300 |
| F | -3.65394200 | -2.53583700 | 0.05909600  |
| F | -3.08961600 | -1.14116500 | -1.52350600 |

**<sup>3</sup>[Cp\*Co(NTf<sub>2</sub>)]<sup>+</sup>**

|    |            |             |             |
|----|------------|-------------|-------------|
| Co | 1.08931300 | 0.11380800  | -0.30196600 |
| C  | 2.39015300 | -0.47766100 | 1.43272400  |
| C  | 2.99809300 | 0.58540900  | 0.75942300  |
| C  | 3.20622100 | 0.16681300  | -0.63727300 |
| C  | 2.75981100 | -1.19165500 | -0.79039200 |
| C  | 2.21868000 | -1.59056600 | 0.46445900  |
| C  | 1.95649600 | -0.55498400 | 2.85876100  |
| H  | 2.57206700 | -1.28947800 | 3.39252500  |
| H  | 0.91659000 | -0.88624800 | 2.93394600  |
| H  | 2.05742300 | 0.40442400  | 3.36725700  |
| C  | 3.36943200 | 1.93352200  | 1.29294500  |
| H  | 4.45997900 | 2.03007400  | 1.34901500  |
| H  | 2.96456500 | 2.09809500  | 2.29219800  |
| H  | 3.00726200 | 2.73438000  | 0.64100700  |
| C  | 3.84795000 | 1.01660100  | -1.67973100 |
| H  | 4.93596500 | 1.01354100  | -1.52939800 |
| H  | 3.51557900 | 2.05576900  | -1.61012900 |
| H  | 3.64931400 | 0.65021500  | -2.68780500 |
| C  | 2.86006300 | -2.02613400 | -2.03373900 |
| H  | 3.83316000 | -2.52814000 | -2.07710900 |
| H  | 2.76071000 | -1.41876900 | -2.93625200 |
| H  | 2.08702200 | -2.79665500 | -2.06176200 |
| C  | 1.66513700 | -2.92407200 | 0.82686700  |
| H  | 2.42639700 | -3.48109700 | 1.39004500  |
| H  | 1.40162800 | -3.51138100 | -0.05300500 |
| H  | 0.78587500 | -2.82973300 | 1.46755700  |

|   |             |             |             |
|---|-------------|-------------|-------------|
| N | -0.82269400 | 0.01456700  | -0.03142300 |
| S | -1.94406000 | -0.91226000 | 0.83390300  |
| S | -1.16030800 | 1.35671700  | -0.92862100 |
| O | -1.17995600 | -1.55861600 | 1.89527700  |
| O | -3.14891000 | -0.13442000 | 1.06894400  |
| O | 0.29018200  | 1.61177900  | -1.36207100 |
| O | -2.20913400 | 1.30355900  | -1.92231100 |
| C | -1.51000600 | 2.76954000  | 0.28858700  |
| C | -2.30250800 | -2.22861400 | -0.45782500 |
| F | -0.70124400 | 2.60473200  | 1.33895400  |
| F | -1.22686700 | 3.90016300  | -0.33657600 |
| F | -2.77076200 | 2.72440700  | 0.65777100  |
| F | -1.13987700 | -2.82052100 | -0.77305700 |
| F | -3.14073800 | -3.11465300 | 0.04939900  |
| F | -2.81282700 | -1.64731800 | -1.53394900 |

**<sup>5</sup>[Cp\*Co(NTf<sub>2</sub>)]<sup>+</sup>**

|    |             |             |             |
|----|-------------|-------------|-------------|
| Co | 0.92340200  | -0.42064900 | -0.26958600 |
| C  | 2.47774900  | -0.41131500 | 1.39536300  |
| C  | 2.95050900  | 0.58956500  | 0.51918100  |
| C  | 3.24050100  | -0.03762200 | -0.77371000 |
| C  | 2.89811400  | -1.42447000 | -0.68780500 |
| C  | 2.49596500  | -1.68276700 | 0.67229500  |
| C  | 2.04238400  | -0.26828500 | 2.82127800  |
| H  | 2.78562800  | -0.71532000 | 3.49219500  |
| H  | 1.09263000  | -0.78425700 | 2.99532400  |
| H  | 1.91896200  | 0.77796700  | 3.10377100  |
| C  | 3.09814100  | 2.05053000  | 0.77964100  |
| H  | 4.14441900  | 2.35382100  | 0.65608800  |
| H  | 2.78233900  | 2.32148100  | 1.78739300  |
| H  | 2.50780200  | 2.62870900  | 0.06026400  |
| C  | 3.74886200  | 0.70553400  | -1.95738400 |
| H  | 4.71825100  | 1.16407700  | -1.72613400 |
| H  | 3.06502800  | 1.52284900  | -2.21626900 |
| H  | 3.87293700  | 0.06278800  | -2.82915600 |
| C  | 3.08931100  | -2.45521000 | -1.76357600 |
| H  | 4.10080800  | -2.87448500 | -1.71549500 |
| H  | 2.95430400  | -2.02489100 | -2.75817600 |
| H  | 2.38357100  | -3.28232300 | -1.65867300 |
| C  | 2.11325300  | -2.99301700 | 1.27379600  |
| H  | 2.81122700  | -3.24499700 | 2.08242600  |
| H  | 2.12981300  | -3.80232600 | 0.54338100  |
| H  | 1.11427600  | -2.94325200 | 1.72334500  |
| N  | -0.95672200 | -0.05440100 | -0.36024700 |

|   |             |             |             |
|---|-------------|-------------|-------------|
| S | -2.02841900 | -0.75735100 | 0.72996600  |
| S | -0.91724100 | 1.46721600  | -1.01121000 |
| O | -1.15330300 | -1.66265000 | 1.48723200  |
| O | -2.88803400 | 0.23115400  | 1.35988100  |
| O | 0.55207000  | 1.45463400  | -1.37443700 |
| O | -1.93118900 | 1.81420600  | -1.98291200 |
| C | -0.99303800 | 2.68711600  | 0.44058600  |
| C | -3.05176000 | -1.80262000 | -0.44935600 |
| F | -0.36518200 | 2.12061000  | 1.48181400  |
| F | -0.33698900 | 3.77596300  | 0.06430200  |
| F | -2.24211500 | 2.96022400  | 0.73951600  |
| F | -2.22799900 | -2.64704700 | -1.07171800 |
| F | -3.95714200 | -2.46689600 | 0.24780200  |
| F | -3.62419100 | -0.98982400 | -1.32613800 |

**<sup>1</sup>Co-1**

|    |             |             |             |
|----|-------------|-------------|-------------|
| Co | -0.28929900 | -0.00006100 | -0.30485100 |
| C  | 1.64105200  | 0.73293900  | -0.55615700 |
| C  | 1.64102600  | -0.73319800 | -0.55584200 |
| C  | 1.10327600  | -1.17842000 | 0.67306500  |
| C  | 0.70250200  | 0.00031500  | 1.42156000  |
| C  | 1.10330400  | 1.17870200  | 0.67256300  |
| C  | 2.09917500  | 1.57129000  | -1.70566600 |
| H  | 3.19462300  | 1.56254300  | -1.75548700 |
| H  | 1.77080300  | 2.60687400  | -1.61288700 |
| H  | 1.73056800  | 1.17872700  | -2.65792300 |
| C  | 2.09906900  | -1.57202600 | -1.70504200 |
| H  | 3.19452900  | -1.56362200 | -1.75473100 |
| H  | 1.73070000  | -1.17963100 | -2.65745800 |
| H  | 1.77038800  | -2.60749000 | -1.61200800 |
| C  | 0.84419700  | -2.58468500 | 1.10985900  |
| H  | 1.45178200  | -2.81816600 | 1.99087200  |
| H  | 1.08539700  | -3.30489200 | 0.32795900  |
| H  | -0.20675000 | -2.71911600 | 1.38197800  |
| C  | 0.04533900  | 0.00064600  | 2.76029200  |
| H  | 0.81485900  | 0.00152400  | 3.54329400  |
| H  | -0.57222100 | -0.88824900 | 2.90346900  |
| H  | -0.57322200 | 0.88900700  | 2.90251100  |
| C  | 0.84412900  | 2.58514400  | 1.10874300  |
| H  | 1.45160800  | 2.81902900  | 1.98972100  |
| H  | -0.20685500 | 2.71962200  | 1.38069600  |
| H  | 1.08537300  | 3.30504200  | 0.32657300  |
| O  | -1.86670400 | 1.08170000  | -0.42172900 |
| O  | -1.86663300 | -1.08191000 | -0.42178300 |

|   |             |             |             |
|---|-------------|-------------|-------------|
| C | -2.55878200 | -0.00012800 | -0.50696500 |
| C | -4.03681500 | -0.00015600 | -0.66341100 |
| H | -4.36010000 | -0.90208900 | -1.18541200 |
| H | -4.48848900 | 0.00022700  | 0.33592600  |
| H | -4.36003900 | 0.90145500  | -1.18601600 |

**<sup>1</sup>Co-2**

|    |             |             |             |
|----|-------------|-------------|-------------|
| Co | 1.90813000  | 0.14738000  | -0.18950000 |
| C  | 1.68427000  | -1.79694800 | 0.66068200  |
| C  | 1.38796600  | -0.80344300 | 1.63412900  |
| C  | 2.53248100  | 0.05541000  | 1.75470700  |
| C  | 3.58257900  | -0.47179800 | 0.90616000  |
| C  | 3.05464800  | -1.58895600 | 0.21114300  |
| C  | 0.81875900  | -2.96796900 | 0.30995200  |
| H  | 0.93272800  | -3.74263500 | 1.07748600  |
| H  | 1.10052500  | -3.41788900 | -0.64382600 |
| H  | -0.23638700 | -2.69613000 | 0.26346100  |
| C  | 0.08718000  | -0.59390700 | 2.34050500  |
| H  | 0.23068600  | -0.68334000 | 3.42253700  |
| H  | -0.66531200 | -1.32063500 | 2.03335100  |
| H  | -0.29891300 | 0.40903100  | 2.13404100  |
| C  | 2.65004500  | 1.24429700  | 2.65371600  |
| H  | 3.07939000  | 0.95015000  | 3.61834200  |
| H  | 1.67166300  | 1.69035700  | 2.84549700  |
| H  | 3.29838700  | 2.00459500  | 2.21369700  |
| C  | 4.93132300  | 0.15238800  | 0.75061700  |
| H  | 5.49305700  | 0.06216700  | 1.68682500  |
| H  | 4.83254800  | 1.21706000  | 0.51978700  |
| H  | 5.51352200  | -0.31987300 | -0.04143100 |
| C  | 3.77506300  | -2.46754900 | -0.76293100 |
| H  | 4.11484900  | -3.37864200 | -0.25721300 |
| H  | 4.65228000  | -1.97478100 | -1.18537800 |
| H  | 3.12699600  | -2.77867900 | -1.58657500 |
| O  | 0.51553500  | 1.52529400  | -0.05397400 |
| O  | 2.58482400  | 1.98782900  | -0.45282200 |
| C  | 1.39683900  | 2.42656400  | -0.27718200 |
| C  | 1.05217500  | 3.87589800  | -0.36880200 |
| H  | 1.93275600  | 4.48866000  | -0.17163600 |
| H  | 0.69813500  | 4.08960000  | -1.38360300 |
| H  | 0.24585100  | 4.11473200  | 0.32722700  |
| C  | 2.07670900  | 0.02603200  | -2.39399400 |
| H  | 2.07274800  | 1.06791200  | -2.69803100 |
| H  | 3.02223100  | -0.49602100 | -2.49863000 |
| C  | 0.90634300  | -0.64863400 | -2.19030700 |

|   |             |             |             |
|---|-------------|-------------|-------------|
| H | 0.95417100  | -1.72599500 | -2.04983400 |
| C | -0.47196000 | -0.07900900 | -2.35394300 |
| H | -0.42868200 | 1.01381200  | -2.33932000 |
| H | -0.80997800 | -0.37111300 | -3.35999100 |
| C | -1.48518500 | -0.58847000 | -1.31882900 |
| H | -1.10251800 | -0.37037300 | -0.31580200 |
| H | -1.56992700 | -1.68076000 | -1.40332700 |
| C | -2.87085500 | 0.04348500  | -1.47608300 |
| H | -2.77698600 | 1.13574500  | -1.40338600 |
| H | -3.25900600 | -0.16679200 | -2.48202600 |
| C | -3.87094000 | -0.45216200 | -0.42563100 |
| H | -3.47389900 | -0.24184000 | 0.57868600  |
| H | -3.96067100 | -1.54568300 | -0.49581500 |
| C | -5.26024400 | 0.18042800  | -0.56313900 |
| H | -5.16887300 | 1.27382500  | -0.49645000 |
| H | -5.65604500 | -0.03073900 | -1.56631900 |
| C | -6.25813200 | -0.31172900 | 0.49095600  |
| H | -5.86149100 | -0.10061100 | 1.49478800  |
| H | -6.34822000 | -1.40547200 | 0.42425300  |
| C | -7.64863000 | 0.31976600  | 0.35339600  |
| H | -7.55672400 | 1.41246700  | 0.41887800  |
| H | -8.04310300 | 0.10742700  | -0.64942200 |
| C | -8.63762700 | -0.17821700 | 1.41156300  |
| H | -8.28215000 | 0.05041200  | 2.42286900  |
| H | -9.62087900 | 0.28686900  | 1.29106900  |
| H | -8.77199400 | -1.26391300 | 1.34599300  |

**<sup>1</sup>Co-2'**

|    |             |             |             |
|----|-------------|-------------|-------------|
| Co | 1.77289000  | -0.10211900 | -0.31821600 |
| C  | 2.81979700  | -1.73642500 | 0.47216800  |
| C  | 1.48455800  | -1.74779200 | 0.97533100  |
| C  | 1.27010800  | -0.51376600 | 1.70086100  |
| C  | 2.46375700  | 0.25837900  | 1.62412300  |
| C  | 3.41542200  | -0.46618500 | 0.81175700  |
| C  | 3.47802200  | -2.84523700 | -0.28379200 |
| H  | 3.88405700  | -3.57163500 | 0.43025200  |
| H  | 4.30722100  | -2.48753900 | -0.89575600 |
| H  | 2.77418400  | -3.37975300 | -0.92589400 |
| C  | 0.51312400  | -2.88262600 | 0.87298400  |
| H  | 0.65437600  | -3.56767700 | 1.71707900  |
| H  | 0.65385400  | -3.46205500 | -0.04214300 |
| H  | -0.52078100 | -2.53492100 | 0.90353900  |
| C  | 0.01455300  | -0.09427400 | 2.39483900  |
| H  | -0.21900800 | 0.94454600  | 2.15267300  |

|   |             |             |             |
|---|-------------|-------------|-------------|
| H | 0.14539700  | -0.17990000 | 3.47980900  |
| H | -0.83494500 | -0.71622200 | 2.10849000  |
| C | 2.70295200  | 1.58418800  | 2.26588900  |
| H | 3.14885200  | 1.42985500  | 3.25571100  |
| H | 1.77305600  | 2.13969300  | 2.38653200  |
| H | 3.39576700  | 2.18588900  | 1.67554600  |
| C | 4.78439500  | 0.01980900  | 0.46055100  |
| H | 5.44264300  | -0.03300400 | 1.33521400  |
| H | 4.73973200  | 1.05996700  | 0.12894600  |
| H | 5.23417300  | -0.57313100 | -0.33722800 |
| O | 0.29027900  | 2.33665100  | 0.25894400  |
| O | 2.16860500  | 1.69961700  | -0.80217400 |
| C | 1.31314900  | 2.60783700  | -0.37419400 |
| C | 1.71353200  | 4.02776100  | -0.71232600 |
| H | 0.85792100  | 4.69192100  | -0.59011300 |
| H | 2.50949500  | 4.34382400  | -0.02933000 |
| H | 2.10921400  | 4.08936500  | -1.72836500 |
| C | 2.30961000  | -0.49224300 | -2.45273700 |
| H | 2.47385800  | 0.54299400  | -2.72765200 |
| H | 3.11781900  | -1.19113500 | -2.63895300 |
| C | 1.07837900  | -0.96513800 | -2.07450700 |
| H | 0.92598500  | -2.03828400 | -1.97706200 |
| C | -0.06542400 | -0.08273900 | -1.69496700 |
| H | 0.09465100  | 0.37523400  | -0.63925300 |
| H | -0.07737800 | 0.83711200  | -2.28692100 |
| C | -1.43727500 | -0.75884100 | -1.61015400 |
| H | -1.33803600 | -1.71231300 | -1.07689600 |
| H | -1.75677400 | -1.00866400 | -2.62959600 |
| C | -2.48985600 | 0.11680100  | -0.92245200 |
| H | -2.13912800 | 0.38002300  | 0.08534700  |
| H | -2.58172800 | 1.06795100  | -1.46281700 |
| C | -3.86046400 | -0.56150700 | -0.83004200 |
| H | -3.75867800 | -1.51712200 | -0.29486300 |
| H | -4.21068100 | -0.81513400 | -1.84005100 |
| C | -4.91223700 | 0.30460100  | -0.12759100 |
| H | -4.55666000 | 0.56132600  | 0.88070300  |
| H | -5.01358800 | 1.25765900  | -0.66500600 |
| C | -6.28390300 | -0.37173000 | -0.02665600 |
| H | -6.18125400 | -1.32617900 | 0.50969000  |
| H | -6.63823600 | -0.62740300 | -1.03529200 |
| C | -7.33680900 | 0.49357000  | 0.67609800  |
| H | -6.98019500 | 0.74935400  | 1.68325700  |
| H | -7.43797100 | 1.44589500  | 0.13830800  |
| C | -8.70340000 | -0.19129500 | 0.77204900  |

|   |             |             |             |
|---|-------------|-------------|-------------|
| H | -8.63583900 | -1.13061500 | 1.33268300  |
| H | -9.43581700 | 0.44617100  | 1.27675300  |
| H | -9.09661800 | -0.42791200 | -0.22306200 |

**<sup>1</sup>Co-TS3**

|    |             |             |             |
|----|-------------|-------------|-------------|
| Co | 1.79443400  | -0.07370900 | -0.36780000 |
| C  | 3.06156300  | -1.50986000 | 0.50240200  |
| C  | 1.68446600  | -1.83541900 | 0.77998400  |
| C  | 1.11291000  | -0.75396400 | 1.53807500  |
| C  | 2.10878500  | 0.25160300  | 1.67876000  |
| C  | 3.31791700  | -0.20546100 | 1.01872200  |
| C  | 4.03808400  | -2.40498300 | -0.19222500 |
| H  | 4.47479700  | -3.09909000 | 0.53553800  |
| H  | 4.85451100  | -1.84205400 | -0.64717300 |
| H  | 3.55872900  | -3.00696500 | -0.96773300 |
| C  | 1.02993800  | -3.15350500 | 0.50129900  |
| H  | 1.20327700  | -3.83288000 | 1.34416600  |
| H  | 1.43693300  | -3.63541600 | -0.39027500 |
| H  | -0.04992200 | -3.05770800 | 0.37729300  |
| C  | -0.27932500 | -0.68740600 | 2.08161000  |
| H  | -0.65588100 | 0.33712700  | 2.07612700  |
| H  | -0.29031500 | -1.04643400 | 3.11748700  |
| H  | -0.97008500 | -1.30784500 | 1.50862900  |
| C  | 1.97096700  | 1.54097200  | 2.42188900  |
| H  | 2.25155300  | 1.39043200  | 3.47080700  |
| H  | 0.94549500  | 1.91206400  | 2.39490900  |
| H  | 2.63144700  | 2.30563100  | 2.00912200  |
| C  | 4.58884700  | 0.57822000  | 0.93559300  |
| H  | 5.05489500  | 0.65213200  | 1.92437900  |
| H  | 4.38494300  | 1.59055000  | 0.57747900  |
| H  | 5.30661100  | 0.11554400  | 0.25680400  |
| O  | 0.00069600  | 2.09123200  | -0.14433100 |
| O  | 2.13827100  | 1.81826300  | -0.70624700 |
| C  | 1.13492500  | 2.57322400  | -0.42760200 |
| C  | 1.33982600  | 4.06245900  | -0.43852300 |
| H  | 0.56525200  | 4.53066100  | -1.05076500 |
| H  | 1.21902100  | 4.44000400  | 0.58184000  |
| H  | 2.33091600  | 4.32009100  | -0.81067500 |
| C  | 2.43270900  | -0.40616700 | -2.38582300 |
| H  | 2.56130700  | 0.62527200  | -2.69528400 |
| H  | 3.27128800  | -1.07254500 | -2.55382300 |
| C  | 1.18379600  | -0.93467000 | -2.09549800 |
| H  | 1.06232500  | -2.01297300 | -2.02106600 |
| C  | 0.05695500  | -0.08773400 | -1.70892200 |



|   |             |             |             |
|---|-------------|-------------|-------------|
| H | 0.16882100  | 0.78307100  | -0.63438900 |
| H | -0.01012400 | 0.80476400  | -2.34065200 |
| C | -1.29034900 | -0.77453100 | -1.49447900 |
| H | -1.15171700 | -1.64577200 | -0.84381600 |
| H | -1.61815500 | -1.17337900 | -2.46432700 |
| C | -2.38862400 | 0.12946700  | -0.92355000 |
| H | -2.07023300 | 0.53855600  | 0.04194100  |
| H | -2.52468900 | 0.99585500  | -1.58387800 |
| C | -3.72147600 | -0.60651300 | -0.75178000 |
| H | -3.57315600 | -1.47964200 | -0.09876400 |
| H | -4.04738300 | -1.00647900 | -1.72188700 |
| C | -4.82652400 | 0.28025200  | -0.16725300 |
| H | -4.49509700 | 0.68186000  | 0.80125500  |
| H | -4.97597500 | 1.15059600  | -0.82124400 |
| C | -6.15929700 | -0.45404600 | 0.01594100  |
| H | -6.00805900 | -1.32638000 | 0.66815100  |
| H | -6.49017900 | -0.85388400 | -0.95302900 |
| C | -7.26493800 | 0.43147900  | 0.60292200  |
| H | -6.93171400 | 0.83136000  | 1.57044300  |
| H | -7.41482000 | 1.30157600  | -0.05045500 |
| C | -8.59180500 | -0.31216400 | 0.78253200  |
| H | -8.47635200 | -1.16838100 | 1.45688300  |
| H | -9.36303700 | 0.34101000  | 1.20218900  |
| H | -8.96279500 | -0.69367300 | -0.17541300 |

#### **<sup>1</sup>Co-4**

|    |             |             |             |
|----|-------------|-------------|-------------|
| Co | 1.86698800  | -0.34762800 | -0.45340700 |
| C  | 3.30279600  | 0.75813900  | 0.58061600  |
| C  | 2.24926500  | 0.23386600  | 1.42699800  |
| C  | 0.99041100  | 0.85852700  | 1.05000600  |
| C  | 1.24079000  | 1.63223900  | -0.10212500 |
| C  | 2.67334500  | 1.56435800  | -0.39675800 |
| C  | 4.76750200  | 0.47911300  | 0.72178200  |
| H  | 5.22528800  | 1.22295700  | 1.38402700  |
| H  | 5.28409600  | 0.52575000  | -0.23888200 |
| H  | 4.95103100  | -0.50479400 | 1.15827900  |
| C  | 2.42889700  | -0.69336600 | 2.58548600  |
| H  | 2.59927800  | -0.11682600 | 3.50320100  |
| H  | 3.28733400  | -1.35389500 | 2.44721400  |
| H  | 1.53994100  | -1.30828500 | 2.74559700  |
| C  | -0.29296500 | 0.69499500  | 1.80103800  |
| H  | -0.21372600 | 1.19644800  | 2.77241900  |
| H  | -0.51749600 | -0.35636400 | 1.99751400  |
| H  | -1.14012300 | 1.12676900  | 1.26839800  |

|   |             |             |             |
|---|-------------|-------------|-------------|
| C | 0.25905600  | 2.43172600  | -0.90326200 |
| H | 0.43875000  | 3.50297100  | -0.75665300 |
| H | -0.77153600 | 2.21938300  | -0.61671000 |
| H | 0.35943100  | 2.23292100  | -1.97477500 |
| C | 3.32621500  | 2.25839000  | -1.55158400 |
| H | 3.44063800  | 3.32650700  | -1.33102900 |
| H | 2.72026400  | 2.18258700  | -2.45944300 |
| H | 4.31662500  | 1.85251900  | -1.76402600 |
| C | 2.96998100  | -1.92435400 | -1.00756000 |
| H | 3.03312600  | -1.73074400 | -2.08269500 |
| H | 3.91506100  | -2.16055300 | -0.53087200 |
| C | 1.75208700  | -2.39559400 | -0.45843300 |
| H | 1.74982300  | -2.91566900 | 0.49836700  |
| C | 0.55439600  | -1.84044300 | -0.93922100 |
| C | -0.81499200 | -2.09934600 | -0.37535000 |
| H | -0.75397100 | -2.14323900 | 0.71991700  |
| H | -1.14996700 | -3.09595000 | -0.69577600 |
| C | -1.84325600 | -1.04978500 | -0.81719400 |
| H | -1.42115200 | -0.05023400 | -0.65792200 |
| H | -2.00466200 | -1.13986100 | -1.89989500 |
| C | -3.18321300 | -1.16131800 | -0.08508100 |
| H | -3.01063700 | -1.09151400 | 0.99872700  |
| H | -3.61413300 | -2.15611800 | -0.26021200 |
| C | -4.18743900 | -0.08372900 | -0.50874400 |
| H | -3.74776300 | 0.91037300  | -0.33473900 |
| H | -4.35955500 | -0.15272800 | -1.59185100 |
| C | -5.52811400 | -0.17938200 | 0.22760200  |
| H | -5.35408600 | -0.11360800 | 1.31128600  |
| H | -5.96819000 | -1.17071800 | 0.05078400  |
| C | -6.53002400 | 0.90282300  | -0.19214400 |
| H | -6.08733400 | 1.89297400  | -0.01592700 |
| H | -6.70191200 | 0.83447200  | -1.27480800 |
| C | -7.86611900 | 0.79696900  | 0.54906300  |
| H | -7.72593200 | 0.89358700  | 1.63167700  |
| H | -8.56226400 | 1.57930200  | 0.23180100  |
| H | -8.34453600 | -0.17098800 | 0.36263700  |
| H | 0.56788500  | -1.48444600 | -1.98446100 |

**<sup>1</sup>Co-5**

|    |            |             |             |
|----|------------|-------------|-------------|
| Co | 1.49499800 | -0.47882700 | -0.31047500 |
| C  | 1.84372800 | -2.39796500 | 0.43375700  |
| C  | 0.52565800 | -2.00297400 | 0.86996900  |
| C  | 0.65317300 | -0.80889600 | 1.62229600  |
| C  | 2.06975700 | -0.49950400 | 1.71222100  |

|   |              |              |              |
|---|--------------|--------------|--------------|
| C | 2. 80352400  | -1. 48842700 | 1. 00284200  |
| C | 2. 19032400  | -3. 64609700 | -0. 32015700 |
| H | 2. 51764200  | -4. 42555000 | 0. 37730900  |
| H | 3. 00747900  | -3. 47926900 | -1. 02718000 |
| H | 1. 33658200  | -4. 04229000 | -0. 87325600 |
| C | -0. 73465100 | -2. 77106900 | 0. 62283600  |
| H | -0. 69485300 | -3. 33206100 | -0. 31269200 |
| H | -1. 61295900 | -2. 12550000 | 0. 59690400  |
| H | -0. 87871100 | -3. 49883300 | 1. 43032000  |
| C | -0. 43126900 | -0. 05762800 | 2. 33567300  |
| H | -0. 36008400 | -0. 22634400 | 3. 41637100  |
| H | -1. 42319100 | -0. 37811300 | 2. 01440400  |
| H | -0. 35916600 | 1. 01842500  | 2. 16175300  |
| C | 2. 63771600  | 0. 62940800  | 2. 51517200  |
| H | 2. 74176700  | 0. 32013700  | 3. 56150800  |
| H | 1. 98231500  | 1. 50386400  | 2. 50395600  |
| H | 3. 62828100  | 0. 92659500  | 2. 16451700  |
| C | 4. 29430600  | -1. 61754000 | 0. 91701300  |
| H | 4. 66349800  | -2. 27398000 | 1. 71364200  |
| H | 4. 79501900  | -0. 65325700 | 1. 03291200  |
| H | 4. 60828800  | -2. 05095800 | -0. 03497900 |
| C | 2. 60026900  | -0. 57209000 | -2. 02683700 |
| H | 2. 82588500  | 0. 43884900  | -2. 35492000 |
| H | 3. 44551800  | -1. 25281800 | -2. 04932600 |
| C | 1. 29760400  | -1. 09621700 | -2. 25791800 |
| H | 1. 15945000  | -2. 17223800 | -2. 33325800 |
| C | 0. 16876300  | -0. 29138800 | -2. 09413800 |
| C | -1. 24802100 | -0. 78152900 | -2. 14534700 |
| H | -1. 28996000 | -1. 85098400 | -1. 91514800 |
| H | -1. 60547900 | -0. 67876300 | -3. 18111200 |
| C | -2. 18295700 | 0. 00889000  | -1. 21694800 |
| H | -1. 75560600 | 0. 01561700  | -0. 20759900 |
| H | -2. 20357600 | 1. 05971800  | -1. 53414700 |
| C | -3. 60902700 | -0. 54657800 | -1. 17428400 |
| H | -3. 57962500 | -1. 60778500 | -0. 88596000 |
| H | -4. 04276300 | -0. 52092800 | -2. 18299000 |
| C | -4. 51698800 | 0. 21719800  | -0. 20386500 |
| H | -4. 07491100 | 0. 18996700  | 0. 80370000  |
| H | -4. 54609400 | 1. 27722300  | -0. 49188800 |
| C | -5. 94540700 | -0. 33478500 | -0. 14461100 |
| H | -5. 91436800 | -1. 39643500 | 0. 14010400  |
| H | -6. 38788600 | -0. 30357400 | -1. 15013600 |
| C | -6. 85042400 | 0. 42597300  | 0. 83176000  |
| H | -6. 40520100 | 0. 39489300  | 1. 83586000  |

|   |             |             |             |
|---|-------------|-------------|-------------|
| H | -6.87985300 | 1.48575500  | 0.54474700  |
| C | -8.27526300 | -0.13350300 | 0.88291700  |
| H | -8.27625200 | -1.18322800 | 1.19788800  |
| H | -8.89986400 | 0.42619000  | 1.58585100  |
| H | -8.75380600 | -0.08343700 | -0.10154800 |
| H | 0.28169600  | 0.77963600  | -2.24670100 |
| C | 3.87061500  | 2.26317700  | -0.45772800 |
| H | 4.19570500  | 2.73725800  | -1.38933600 |
| H | 4.13131000  | 1.20586500  | -0.46920400 |
| H | 4.37555000  | 2.76976300  | 0.36973400  |
| C | 2.40737300  | 2.41565900  | -0.30299700 |
| O | 1.88312600  | 3.64636500  | -0.15291600 |
| N | 1.51364700  | 1.48107900  | -0.27946200 |
| O | 0.26773400  | 2.14251400  | -0.08670100 |
| C | 0.50271100  | 3.49128100  | -0.00978200 |
| O | -0.29352900 | 4.35049600  | 0.14935200  |

**<sup>1</sup>Co-TS6**

|    |             |             |             |
|----|-------------|-------------|-------------|
| Co | 1.58590500  | -0.44704800 | -0.27926700 |
| C  | 2.03120300  | -2.35866100 | 0.49768600  |
| C  | 0.66948500  | -2.04231500 | 0.83872500  |
| C  | 0.67236400  | -0.84131600 | 1.60962700  |
| C  | 2.04292300  | -0.41483200 | 1.75062600  |
| C  | 2.88622900  | -1.35890800 | 1.07567400  |
| C  | 2.49682600  | -3.58919200 | -0.21736100 |
| H  | 2.75320800  | -4.36278900 | 0.51567900  |
| H  | 3.39172200  | -3.40317300 | -0.81545500 |
| H  | 1.72636000  | -4.00540800 | -0.86914500 |
| C  | -0.52798100 | -2.87599200 | 0.50531100  |
| H  | -0.39806600 | -3.41915400 | -0.43289900 |
| H  | -1.43535600 | -2.27581100 | 0.43111500  |
| H  | -0.68321300 | -3.62248100 | 1.29323100  |
| C  | -0.49731100 | -0.13627700 | 2.22262900  |
| H  | -0.36525500 | -0.07696600 | 3.30861500  |
| H  | -1.43431800 | -0.65827400 | 2.02633500  |
| H  | -0.58378600 | 0.88174700  | 1.83434800  |
| C  | 2.47758800  | 0.77744600  | 2.53969400  |
| H  | 2.52559100  | 0.51367200  | 3.60258700  |
| H  | 1.76874900  | 1.60105300  | 2.43232700  |
| H  | 3.46690900  | 1.12678700  | 2.24017300  |
| C  | 4.38211000  | -1.34532900 | 1.03744400  |
| H  | 4.78192800  | -1.91822800 | 1.88254800  |
| H  | 4.77802800  | -0.33062900 | 1.11141600  |
| H  | 4.76807800  | -1.79784100 | 0.12171100  |

|   |             |             |             |
|---|-------------|-------------|-------------|
| C | 2.59549200  | -0.66823600 | -2.07375900 |
| H | 2.86571100  | 0.32219000  | -2.41999400 |
| H | 3.40498100  | -1.39011500 | -2.05080100 |
| C | 1.26523900  | -1.14056000 | -2.23740400 |
| H | 1.08554800  | -2.21313800 | -2.24057600 |
| C | 0.15664400  | -0.29588600 | -2.19557300 |
| C | -1.25421100 | -0.77250900 | -2.21250800 |
| H | -1.29866500 | -1.85386000 | -2.04367000 |
| H | -1.62970800 | -0.60304900 | -3.23480900 |
| C | -2.17315400 | -0.02333400 | -1.22792900 |
| H | -1.73104000 | -0.06887900 | -0.22810300 |
| H | -2.18949600 | 1.04107800  | -1.48422300 |
| C | -3.59418000 | -0.59117300 | -1.19864800 |
| H | -3.55706200 | -1.66625900 | -0.96651900 |
| H | -4.04260200 | -0.51397500 | -2.19829200 |
| C | -4.48973800 | 0.11762200  | -0.17588100 |
| H | -4.03296100 | 0.03882500  | 0.82215000  |
| H | -4.52496600 | 1.19083600  | -0.40722900 |
| C | -5.91537000 | -0.44270600 | -0.12656800 |
| H | -5.87731100 | -1.51813100 | 0.09998300  |
| H | -6.37242700 | -0.35865600 | -1.12245100 |
| C | -6.80800100 | 0.26136000  | 0.90240300  |
| H | -6.34815100 | 0.17771900  | 1.89684000  |
| H | -6.84429200 | 1.33481200  | 0.67337100  |
| C | -8.23034000 | -0.30523400 | 0.94344600  |
| H | -8.22409000 | -1.37045500 | 1.20122600  |
| H | -8.84596100 | 0.21363600  | 1.68448900  |
| H | -8.72328600 | -0.20347100 | -0.02983000 |
| H | 0.30409700  | 0.77505400  | -2.30045500 |
| C | 3.81906100  | 2.42769300  | -0.45566800 |
| H | 4.08130800  | 3.04598900  | -1.31800200 |
| H | 4.21445400  | 1.41995600  | -0.57950000 |
| H | 4.23766200  | 2.89339900  | 0.44010300  |
| C | 2.30139300  | 2.44161800  | -0.31490700 |
| O | 1.74740300  | 3.57318400  | -0.13710600 |
| N | 1.71510600  | 1.28614000  | -0.42177700 |
| O | -0.22695300 | 2.23444800  | -0.16169500 |
| C | -0.00766300 | 3.43981900  | -0.02234800 |
| O | -0.47409400 | 4.51021000  | 0.15230900  |

**<sup>1</sup>Co-7**

|    |             |             |             |
|----|-------------|-------------|-------------|
| Co | -1.66326800 | -0.11824300 | 0.35243200  |
| C  | -3.03675700 | -0.36779600 | -1.19559500 |
| C  | -2.33585300 | -1.60872800 | -1.04082500 |

|   |             |             |             |
|---|-------------|-------------|-------------|
| C | -0.94102900 | -1.36196500 | -1.25507200 |
| C | -0.76995200 | 0.02684800  | -1.57305400 |
| C | -2.06770400 | 0.64176600  | -1.54120900 |
| C | -4.51609800 | -0.16095700 | -1.10962000 |
| H | -4.96608400 | -0.27190000 | -2.10353300 |
| H | -4.75814500 | 0.83988300  | -0.74623000 |
| H | -4.99113600 | -0.88892500 | -0.44923500 |
| C | -2.96699700 | -2.94320500 | -0.78779500 |
| H | -3.25170900 | -3.39958600 | -1.74280600 |
| H | -3.87505800 | -2.86276800 | -0.18646600 |
| H | -2.28529200 | -3.63756300 | -0.29198700 |
| C | 0.14674200  | -2.38964400 | -1.23265200 |
| H | 0.26950400  | -2.81633500 | -2.23524600 |
| H | -0.08305600 | -3.21541900 | -0.55586200 |
| H | 1.10474600  | -1.95856200 | -0.93784700 |
| C | 0.49615600  | 0.72353500  | -1.96263500 |
| H | 0.42233800  | 1.05499100  | -3.00482600 |
| H | 1.36270000  | 0.06615100  | -1.88309700 |
| H | 0.66199900  | 1.60321500  | -1.33490500 |
| C | -2.36411000 | 2.04872700  | -1.94978100 |
| H | -2.58331800 | 2.06694300  | -3.02413900 |
| H | -1.50986400 | 2.70411700  | -1.77289100 |
| H | -3.23432300 | 2.45210700  | -1.42879100 |
| C | -2.74860300 | -0.90322400 | 1.98134000  |
| H | -2.92975000 | -0.05378700 | 2.62796400  |
| H | -3.62081600 | -1.47659100 | 1.68864500  |
| C | -1.47579700 | -1.51849000 | 1.94050600  |
| H | -1.38379000 | -2.51751600 | 1.52165600  |
| C | -0.29999700 | -0.82906800 | 2.25357300  |
| C | 1.07480000  | -1.34667200 | 2.03874000  |
| H | 1.05836100  | -2.28026100 | 1.46720100  |
| H | 1.48940800  | -1.58753500 | 3.03048400  |
| C | 1.98961400  | -0.29942500 | 1.36636600  |
| H | 1.50164400  | 0.05518800  | 0.45332300  |
| H | 2.06994700  | 0.58062700  | 2.01550200  |
| C | 3.38109800  | -0.84725000 | 1.03993300  |
| H | 3.28380600  | -1.74594600 | 0.41246000  |
| H | 3.87465400  | -1.17643800 | 1.96409100  |
| C | 4.26274700  | 0.18057500  | 0.32079800  |
| H | 3.75855000  | 0.51053000  | -0.59957000 |
| H | 4.35990500  | 1.07684200  | 0.94828100  |
| C | 5.65606300  | -0.35500800 | -0.02676700 |
| H | 5.55611700  | -1.25449900 | -0.65145200 |
| H | 6.16006200  | -0.67993100 | 0.89419800  |

|   |             |             |             |
|---|-------------|-------------|-------------|
| C | 6.53543200  | 0.67098600  | -0.75162000 |
| H | 6.02858100  | 0.99578700  | -1.67078700 |
| H | 6.63353200  | 1.56776800  | -0.12532700 |
| C | 7.92552600  | 0.12704800  | -1.09438900 |
| H | 7.85645800  | -0.75176200 | -1.74559600 |
| H | 8.53215100  | 0.87752500  | -1.61027200 |
| H | 8.46532500  | -0.17356600 | -0.18947100 |
| H | -0.38745200 | 0.10601700  | 2.79677100  |
| C | -2.21570200 | 3.65680900  | 1.08191500  |
| H | -3.20146700 | 3.19735400  | 1.19720600  |
| H | -2.22575000 | 4.37254300  | 0.25617400  |
| H | -1.97354200 | 4.19915800  | 2.00109700  |
| C | -1.12868100 | 2.63428200  | 0.81933100  |
| N | -1.41123200 | 1.36227600  | 1.19035500  |
| O | -0.00097100 | 2.92548800  | 0.40477700  |

**<sup>1</sup>Co-TS8**

|    |             |             |             |
|----|-------------|-------------|-------------|
| Co | -1.81520900 | -0.06808900 | 0.37796000  |
| C  | -3.38440000 | 0.17295900  | -0.93736900 |
| C  | -3.18398700 | -1.23740600 | -0.74912300 |
| C  | -1.85069900 | -1.54873400 | -1.15136400 |
| C  | -1.22157000 | -0.33744100 | -1.61712500 |
| C  | -2.17980200 | 0.71934500  | -1.51754200 |
| C  | -4.63880400 | 0.93647800  | -0.65311200 |
| H  | -5.28669800 | 0.93542300  | -1.53799500 |
| H  | -4.42292800 | 1.97654800  | -0.40066200 |
| H  | -5.20113200 | 0.49555800  | 0.17228700  |
| C  | -4.19992900 | -2.21813900 | -0.25017400 |
| H  | -3.74888200 | -2.98934100 | 0.38006400  |
| H  | -4.67063100 | -2.72737000 | -1.09884300 |
| H  | -4.99160400 | -1.72867400 | 0.31975900  |
| C  | -1.23492600 | -2.91348500 | -1.16525200 |
| H  | -1.36611500 | -3.36254700 | -2.15679600 |
| H  | -1.70415500 | -3.58395400 | -0.44203500 |
| H  | -0.16202300 | -2.88487300 | -0.96473400 |
| C  | 0.17712200  | -0.18893900 | -2.12750700 |
| H  | 0.16744200  | -0.09244900 | -3.21960000 |
| H  | 0.79395900  | -1.05350400 | -1.87693500 |
| H  | 0.64641300  | 0.70426400  | -1.70703700 |
| C  | -1.99657300 | 2.11155900  | -2.03072300 |
| H  | -2.29083000 | 2.13993700  | -3.08655900 |
| H  | -0.95580100 | 2.43290900  | -1.96496900 |
| H  | -2.62001000 | 2.82993500  | -1.49620400 |
| C  | -2.55027600 | -0.74665300 | 2.32449000  |

|   |             |             |             |
|---|-------------|-------------|-------------|
| H | -2.59983700 | 0.17251500  | 2.89456700  |
| H | -3.45587000 | -1.33837200 | 2.26265400  |
| C | -1.33174700 | -1.31445100 | 1.96845600  |
| H | -1.29880100 | -2.32587500 | 1.56953300  |
| C | -0.09223300 | -0.58037300 | 1.99997700  |
| C | 1.15866100  | -1.15829300 | 1.42316000  |
| H | 0.93552500  | -1.70401200 | 0.50076700  |
| H | 1.46726400  | -1.92633700 | 2.15590000  |
| C | 2.31627500  | -0.17562700 | 1.21458300  |
| H | 1.98108900  | 0.63709500  | 0.56508900  |
| H | 2.57305300  | 0.28383600  | 2.17840200  |
| C | 3.55200600  | -0.85782100 | 0.61903500  |
| H | 3.28110100  | -1.32306100 | -0.34089000 |
| H | 3.87916500  | -1.67857000 | 1.27304200  |
| C | 4.71562400  | 0.11459500  | 0.39600900  |
| H | 4.37920000  | 0.93867900  | -0.24844900 |
| H | 4.99217200  | 0.57291500  | 1.35560900  |
| C | 5.94905000  | -0.54996400 | -0.22525000 |
| H | 5.67110300  | -1.00852000 | -1.18542100 |
| H | 6.28250900  | -1.37534300 | 0.41981100  |
| C | 7.11397000  | 0.42208800  | -0.44727000 |
| H | 6.77769500  | 1.24742500  | -1.08950000 |
| H | 7.39118500  | 0.87749600  | 0.51297100  |
| C | 8.34049300  | -0.24997900 | -1.07155100 |
| H | 8.09807000  | -0.68561200 | -2.04763200 |
| H | 9.15639200  | 0.46425100  | -1.21886700 |
| H | 8.71555800  | -1.05779300 | -0.43302400 |
| H | 0.03410900  | 0.16025200  | 2.77910600  |
| C | -1.22158400 | 3.63499100  | 0.89511500  |
| H | -1.07960600 | 4.30343200  | 0.04356200  |
| H | -0.80843400 | 4.11628000  | 1.78726500  |
| H | -2.28513500 | 3.45158400  | 1.06792900  |
| C | -0.43693800 | 2.35374000  | 0.63753700  |
| N | -1.03370700 | 1.25970800  | 1.20307100  |
| O | 0.64671300  | 2.34945100  | 0.05517700  |

**<sup>1</sup>Co-9**

|    |            |             |             |
|----|------------|-------------|-------------|
| Co | 1.89900800 | -0.11983400 | -0.26799600 |
| C  | 3.93551300 | 0.00659300  | 0.21723600  |
| C  | 3.46117700 | -1.30999000 | 0.49649400  |
| C  | 2.36101100 | -1.19392500 | 1.40540200  |
| C  | 2.21137400 | 0.20436200  | 1.76227200  |
| C  | 3.18314400 | 0.94348500  | 1.03027600  |
| C  | 5.04226200 | 0.37918800  | -0.71863700 |



|   |              |              |              |
|---|--------------|--------------|--------------|
| H | 5. 97095800  | 0. 53947400  | -0. 15856100 |
| H | 4. 81774100  | 1. 30634500  | -1. 25201200 |
| H | 5. 23122900  | -0. 40199500 | -1. 45708600 |
| C | 3. 97720100  | -2. 59957700 | -0. 06565100 |
| H | 4. 53695800  | -3. 13992100 | 0. 70560900  |
| H | 4. 65123900  | -2. 44060300 | -0. 90882300 |
| H | 3. 16395100  | -3. 25387100 | -0. 39303400 |
| C | 1. 53817000  | -2. 31710200 | 1. 94956600  |
| H | 1. 95084600  | -2. 65003700 | 2. 91020700  |
| H | 1. 53125800  | -3. 17790400 | 1. 27768400  |
| H | 0. 50669700  | -2. 00439400 | 2. 12652700  |
| C | 1. 25513300  | 0. 72979600  | 2. 78333500  |
| H | 1. 63967400  | 0. 49797300  | 3. 78435000  |
| H | 0. 27421800  | 0. 25854700  | 2. 68725400  |
| H | 1. 11968200  | 1. 80417400  | 2. 68639400  |
| C | 3. 37828900  | 2. 42194600  | 1. 08544900  |
| H | 3. 75303500  | 2. 70781000  | 2. 07505300  |
| H | 2. 42361000  | 2. 93537900  | 0. 93500800  |
| H | 4. 09671000  | 2. 76655100  | 0. 34031300  |
| C | 2. 14388100  | -0. 88068400 | -2. 33601400 |
| H | 2. 30802900  | 0. 08138000  | -2. 81729000 |
| H | 2. 93948200  | -1. 61072200 | -2. 42856800 |
| C | 0. 92487100  | -1. 22755100 | -1. 83028900 |
| H | 0. 73219600  | -2. 25088000 | -1. 51508900 |
| C | -0. 21388100 | -0. 20486300 | -1. 72875100 |
| C | -1. 48415300 | -0. 89895600 | -1. 19989700 |
| H | -1. 21379000 | -1. 42815800 | -0. 27523400 |
| H | -1. 76001900 | -1. 66736100 | -1. 93447600 |
| C | -2. 68828100 | 0. 00458400  | -0. 93190000 |
| H | -2. 43306300 | 0. 73895600  | -0. 15758500 |
| H | -2. 93645800 | 0. 57407300  | -1. 83679800 |
| C | -3. 92145300 | -0. 78467400 | -0. 47456200 |
| H | -3. 66822500 | -1. 36536400 | 0. 42390800  |
| H | -4. 19122400 | -1. 51831000 | -1. 24666700 |
| C | -5. 12877400 | 0. 11190700  | -0. 17750200 |
| H | -4. 85399500 | 0. 84756400  | 0. 59202800  |
| H | -5. 38006900 | 0. 69129900  | -1. 07712500 |
| C | -6. 36368100 | -0. 66931300 | 0. 28500900  |
| H | -6. 11146000 | -1. 24942000 | 1. 18428900  |
| H | -6. 63757800 | -1. 40532100 | -0. 48416100 |
| C | -7. 57202500 | 0. 22665400  | 0. 58239100  |
| H | -7. 29553100 | 0. 96253600  | 1. 34975900  |
| H | -7. 82253900 | 0. 80462200  | -0. 31746200 |
| C | -8. 79986900 | -0. 56329200 | 1. 04519700  |

|   |             |             |             |
|---|-------------|-------------|-------------|
| H | -8.58541700 | -1.12490000 | 1.96155500  |
| H | -9.64710500 | 0.09823400  | 1.25032600  |
| H | -9.11602700 | -1.28363500 | 0.28226700  |
| H | -0.41652100 | 0.26462900  | -2.70098200 |
| C | -0.94352700 | 2.74363300  | -1.45804200 |
| H | -1.90053700 | 2.97615300  | -0.98495100 |
| H | -1.13110500 | 2.20942600  | -2.38849100 |
| H | -0.45119700 | 3.69439000  | -1.67900800 |
| C | -0.06485300 | 2.00994200  | -0.45938500 |
| N | 0.39812800  | 0.72462600  | -0.76898000 |
| O | 0.30688300  | 2.57293100  | 0.56095300  |

**<sup>3</sup>Co-1**

|    |             |             |             |
|----|-------------|-------------|-------------|
| Co | -0.45537600 | -0.00199500 | -0.21741400 |
| C  | 1.20331400  | -0.69811700 | 1.14115200  |
| C  | 1.19941400  | 0.69913000  | 1.14321000  |
| C  | 1.36455800  | 1.15090500  | -0.25112500 |
| C  | 1.52551000  | 0.00462400  | -1.09237500 |
| C  | 1.37097100  | -1.14491900 | -0.25448400 |
| C  | 1.04582000  | -1.63198300 | 2.29817400  |
| H  | 1.97870600  | -2.18310800 | 2.46580300  |
| H  | 0.26318300  | -2.37279200 | 2.10691500  |
| H  | 0.79661100  | -1.10171200 | 3.21797000  |
| C  | 1.03668700  | 1.62879300  | 2.30288500  |
| H  | 1.96638000  | 2.18484100  | 2.47197500  |
| H  | 0.79066900  | 1.09449200  | 3.22120700  |
| H  | 0.24974200  | 2.36557300  | 2.11374700  |
| C  | 1.43599900  | 2.58372600  | -0.65952000 |
| H  | 2.42297400  | 2.98799500  | -0.39841600 |
| H  | 0.69048700  | 3.18682400  | -0.13420700 |
| H  | 1.29669100  | 2.71187200  | -1.73385800 |
| C  | 1.81861700  | 0.00759100  | -2.56479900 |
| H  | 2.90126400  | 0.01109100  | -2.73448600 |
| H  | 1.40413600  | 0.88988200  | -3.05726600 |
| H  | 1.40945900  | -0.87579300 | -3.05975000 |
| C  | 1.45056700  | -2.57616100 | -0.66701500 |
| H  | 2.44025200  | -2.97521900 | -0.40816700 |
| H  | 1.31087600  | -2.70211500 | -1.74157000 |
| H  | 0.70931800  | -3.18528800 | -0.14264000 |
| O  | -2.07079300 | -1.09416400 | -0.16601400 |
| O  | -2.07298300 | 1.08252100  | -0.16410200 |
| C  | -2.76036900 | -0.00728400 | -0.14663700 |
| C  | -4.24818300 | -0.00330800 | -0.12565600 |
| H  | -4.60661600 | 0.78186200  | 0.54368000  |

|   |             |             |             |
|---|-------------|-------------|-------------|
| H | -4.60729200 | 0.23107800  | -1.13437300 |
| H | -4.62891100 | -0.98044800 | 0.17168800  |

**<sup>3</sup>Co-2**

|    |             |             |             |
|----|-------------|-------------|-------------|
| Co | -1.98828100 | 0.22557600  | 0.30120700  |
| C  | -1.49577200 | -1.90153800 | -0.55155600 |
| C  | -1.10728900 | -0.96625700 | -1.51814500 |
| C  | -2.27326200 | -0.16985600 | -1.83066300 |
| C  | -3.42282100 | -0.68335900 | -1.08066400 |
| C  | -2.94549700 | -1.71108000 | -0.26068200 |
| C  | -0.67657000 | -3.01819800 | 0.00556800  |
| H  | -0.83910600 | -3.91951400 | -0.60011800 |
| H  | -0.96334300 | -3.27238900 | 1.02859400  |
| H  | 0.38994700  | -2.79259900 | -0.01244500 |
| C  | 0.25031200  | -0.74989600 | -2.11362900 |
| H  | 0.22336500  | -0.88379600 | -3.20018100 |
| H  | 0.98484600  | -1.44713500 | -1.70823300 |
| H  | 0.60012700  | 0.26670100  | -1.90669800 |
| C  | -2.33251400 | 0.92476600  | -2.83654300 |
| H  | -2.69271600 | 0.52391200  | -3.79357700 |
| H  | -1.34759300 | 1.36373700  | -3.00689300 |
| H  | -3.02534000 | 1.70807100  | -2.52171500 |
| C  | -4.81282800 | -0.13719100 | -1.20023200 |
| H  | -5.22153500 | -0.34507700 | -2.19520800 |
| H  | -4.81445000 | 0.94759600  | -1.05716200 |
| H  | -5.48543000 | -0.57951500 | -0.46345100 |
| C  | -3.72583500 | -2.58032300 | 0.67467200  |
| H  | -3.85607700 | -3.57992500 | 0.24291100  |
| H  | -4.71764700 | -2.17144100 | 0.87453400  |
| H  | -3.21058700 | -2.71215500 | 1.63136000  |
| O  | -0.49668600 | 1.71424500  | 0.10774600  |
| O  | -2.64152600 | 2.11640900  | 0.09865800  |
| C  | -1.43851500 | 2.56373700  | 0.03443000  |
| C  | -1.17665200 | 4.03494200  | -0.09178900 |
| H  | -1.96564200 | 4.51327300  | -0.67444200 |
| H  | -1.18322000 | 4.47848500  | 0.91009600  |
| H  | -0.19793000 | 4.20980700  | -0.54006100 |
| C  | -2.11834700 | 0.30272500  | 2.55581800  |
| H  | -2.10057800 | 1.37797500  | 2.71292700  |
| H  | -3.08677400 | -0.18979800 | 2.63662600  |
| C  | -0.96680300 | -0.42062300 | 2.51085100  |
| H  | -1.04457100 | -1.50674900 | 2.46067500  |
| C  | 0.41716100  | 0.13962200  | 2.60533900  |
| H  | 0.38281500  | 1.22782400  | 2.50129700  |

|   |            |             |             |
|---|------------|-------------|-------------|
| H | 0.78414000 | -0.08269000 | 3.61896600  |
| C | 1.38602600 | -0.46398700 | 1.57529200  |
| H | 0.96071600 | -0.32145800 | 0.57637600  |
| H | 1.46740200 | -1.54654800 | 1.74376700  |
| C | 2.77869100 | 0.16976300  | 1.61786500  |
| H | 2.68260600 | 1.25326100  | 1.46689800  |
| H | 3.21704600 | 0.03208300  | 2.61555000  |
| C | 3.72005200 | -0.41060700 | 0.55625700  |
| H | 3.27056200 | -0.27180300 | -0.43840700 |
| H | 3.81020800 | -1.49669100 | 0.70275400  |
| C | 5.11651900 | 0.22085200  | 0.57117400  |
| H | 5.02407600 | 1.30693400  | 0.43002000  |
| H | 5.56651600 | 0.08038400  | 1.56374700  |
| C | 6.05280100 | -0.35332100 | -0.49787300 |
| H | 5.60066000 | -0.21403400 | -1.49080600 |
| H | 6.14474700 | -1.43975700 | -0.35597900 |
| C | 7.44980600 | 0.27864500  | -0.48540700 |
| H | 7.35592200 | 1.36403500  | -0.62595000 |
| H | 7.89982200 | 0.13829300  | 0.50658000  |
| C | 8.37671900 | -0.30136100 | -1.55789700 |
| H | 7.96500400 | -0.14581500 | -2.56174400 |
| H | 9.36575600 | 0.16600400  | -1.52755400 |
| H | 8.51326200 | -1.37999200 | -1.42000500 |

**<sup>3</sup>Co-TS3**

|    |            |             |             |
|----|------------|-------------|-------------|
| Co | 2.23923000 | -0.08677700 | -0.53295200 |
| C  | 4.13634000 | -0.76634400 | 0.24761000  |
| C  | 3.02908500 | -1.29659500 | 1.07438300  |
| C  | 2.38149300 | -0.20374600 | 1.71671200  |
| C  | 3.03107100 | 0.98386500  | 1.26916000  |
| C  | 4.13188500 | 0.63178800  | 0.38348500  |
| C  | 5.12873500 | -1.61550000 | -0.48533100 |
| H  | 5.89135400 | -1.98747700 | 0.20942300  |
| H  | 5.63899700 | -1.05384400 | -1.26998700 |
| H  | 4.65707200 | -2.48721600 | -0.94571300 |
| C  | 2.78406000 | -2.75155600 | 1.31258100  |
| H  | 3.52336900 | -3.13100000 | 2.02911500  |
| H  | 2.89371400 | -3.34292600 | 0.40012900  |
| H  | 1.79502100 | -2.93886300 | 1.73451800  |
| C  | 1.20545300 | -0.26236400 | 2.64883000  |
| H  | 0.44565200 | 0.47383100  | 2.37254000  |
| H  | 1.51421600 | -0.06036700 | 3.68021200  |
| H  | 0.73167700 | -1.24600700 | 2.63417100  |
| C  | 2.67424300 | 2.38385900  | 1.64251800  |

|   |              |             |             |
|---|--------------|-------------|-------------|
| H | 3.41202500   | 2.77981500  | 2.35112900  |
| H | 1.69099400   | 2.44241200  | 2.11239000  |
| H | 2.68808100   | 3.03659300  | 0.76484800  |
| C | 5.05287400   | 1.62843500  | -0.25210900 |
| H | 5.69856000   | 1.16345300  | -0.99887100 |
| H | 5.69575400   | 2.09392900  | 0.50354700  |
| H | 4.49001600   | 2.42924600  | -0.74197800 |
| O | -0.48023800  | 1.23054400  | -0.14503600 |
| O | 1.46197400   | 1.53213700  | -1.22582300 |
| C | 0.33781600   | 1.96287800  | -0.79144800 |
| C | -0.03091400  | 3.39507400  | -1.04961900 |
| H | -0.96056000  | 3.42615600  | -1.62548700 |
| H | -0.23270500  | 3.88733600  | -0.09312200 |
| H | 0.76219200   | 3.91788200  | -1.58291900 |
| C | 1.61598300   | -1.58715800 | -1.76424000 |
| H | 1.58440800   | -1.11850900 | -2.75064700 |
| H | 2.33834800   | -2.39677700 | -1.68035900 |
| C | 0.37111300   | -1.78814600 | -1.09691900 |
| H | 0.38664400   | -2.46826800 | -0.24303700 |
| C | -0.82189900  | -1.09169300 | -1.32383400 |
| H | -0.52236000  | 0.01849600  | -0.60841200 |
| H | -0.89750300  | -0.60518500 | -2.30254700 |
| C | -2.14381800  | -1.55874100 | -0.72182800 |
| H | -1.97429500  | -1.90547500 | 0.30667800  |
| H | -2.49735300  | -2.43235100 | -1.28696300 |
| C | -3.23530300  | -0.47974600 | -0.73452100 |
| H | -2.89727500  | 0.39229200  | -0.16147800 |
| H | -3.38135800  | -0.13132800 | -1.76679600 |
| C | -4.57046100  | -0.98092600 | -0.17413700 |
| H | -4.42152100  | -1.33726400 | 0.85517700  |
| H | -4.90536600  | -1.85316900 | -0.75273600 |
| C | -5.66746300  | 0.08966900  | -0.18660900 |
| H | -5.32945300  | 0.96230900  | 0.39055900  |
| H | -5.81578100  | 0.44494100  | -1.21624400 |
| C | -7.00412200  | -0.40525700 | 0.37696300  |
| H | -6.85545200  | -0.76175800 | 1.40635600  |
| H | -7.34128000  | -1.27791800 | -0.20027100 |
| C | -8.10232100  | 0.66473600  | 0.36517600  |
| H | -7.76326600  | 1.53634700  | 0.94171200  |
| H | -8.24941700  | 1.01931000  | -0.66407100 |
| C | -9.43328100  | 0.15980900  | 0.93049100  |
| H | -9.32054500  | -0.17111300 | 1.96921300  |
| H | -10.19932100 | 0.94120300  | 0.91078700  |
| H | -9.80979300  | -0.69126000 | 0.35180600  |

**<sup>3</sup>Co-4**

|    |             |             |             |
|----|-------------|-------------|-------------|
| Co | -1.86985300 | 0.43425100  | -0.50696000 |
| C  | -3.27018600 | -0.92823800 | 0.31359700  |
| C  | -2.45631000 | -0.47303500 | 1.42045200  |
| C  | -1.11005900 | -0.84957700 | 1.15865000  |
| C  | -1.07962600 | -1.56503200 | -0.10148500 |
| C  | -2.41114800 | -1.62783100 | -0.61324000 |
| C  | -4.76521100 | -0.84717000 | 0.23138000  |
| H  | -5.21257100 | -1.73084700 | 0.70212400  |
| H  | -5.11362500 | -0.81582400 | -0.80334300 |
| H  | -5.15408900 | 0.03193700  | 0.74962300  |
| C  | -2.96047000 | 0.26265300  | 2.62559700  |
| H  | -3.30726900 | -0.44288800 | 3.38978900  |
| H  | -3.80419600 | 0.91256000  | 2.37923200  |
| H  | -2.18059500 | 0.87746500  | 3.08151200  |
| C  | 0.06745000  | -0.60422000 | 2.05255600  |
| H  | 0.19462400  | -1.44048600 | 2.75041300  |
| H  | -0.06065800 | 0.30090800  | 2.65120300  |
| H  | 0.99587500  | -0.50614500 | 1.48688100  |
| C  | 0.10826600  | -2.25860900 | -0.70125400 |
| H  | 0.03979200  | -3.33567100 | -0.50652100 |
| H  | 1.04929100  | -1.90841700 | -0.27523800 |
| H  | 0.15573900  | -2.12892800 | -1.78586000 |
| C  | -2.85285900 | -2.36750100 | -1.84307800 |
| H  | -3.12584800 | -3.39839600 | -1.58749200 |
| H  | -2.05923000 | -2.41594900 | -2.59258400 |
| H  | -3.72820700 | -1.90406200 | -2.30462400 |
| C  | -2.96587200 | 2.14423700  | -0.80942200 |
| H  | -3.05894000 | 2.08310600  | -1.89700000 |
| H  | -3.89182700 | 2.30978700  | -0.27021200 |
| C  | -1.72642600 | 2.50793000  | -0.23150900 |
| H  | -1.70547000 | 2.84839300  | 0.80343000  |
| C  | -0.52687200 | 2.09418000  | -0.82633500 |
| C  | 0.82891700  | 2.23101400  | -0.19328000 |
| H  | 0.73679300  | 2.12819500  | 0.89507900  |
| H  | 1.19944500  | 3.25059800  | -0.37549800 |
| C  | 1.84159200  | 1.21688600  | -0.74269300 |
| H  | 1.39604000  | 0.21568500  | -0.69823200 |
| H  | 2.01876300  | 1.42138500  | -1.80705500 |
| C  | 3.17362800  | 1.21744700  | 0.01313200  |
| H  | 2.98445700  | 1.04312400  | 1.08246500  |
| H  | 3.63213900  | 2.21296700  | -0.05442400 |
| C  | 4.15500400  | 0.16105900  | -0.50700600 |

|   |             |             |             |
|---|-------------|-------------|-------------|
| H | 3.68570800  | -0.83257000 | -0.44354600 |
| H | 4.34712200  | 0.33719200  | -1.57443700 |
| C | 5.48488300  | 0.14104600  | 0.25451800  |
| H | 5.29017300  | -0.03091100 | 1.32292000  |
| H | 5.95569700  | 1.13174700  | 0.18755800  |
| C | 6.46279300  | -0.92181100 | -0.26053400 |
| H | 5.98841900  | -1.91082300 | -0.19555900 |
| H | 6.65667700  | -0.74656300 | -1.32732000 |
| C | 7.78725800  | -0.93470800 | 0.50845900  |
| H | 7.62408800  | -1.13939800 | 1.57264900  |
| H | 8.46620900  | -1.70074300 | 0.12182200  |
| H | 8.29693100  | 0.03221200  | 0.43194000  |
| H | -0.53393700 | 1.93426500  | -1.91279700 |

**<sup>3</sup>Co-5**

|    |             |             |             |
|----|-------------|-------------|-------------|
| Co | -1.57239500 | -0.47231500 | 0.36388500  |
| C  | -1.96404200 | -2.48473500 | -0.60389900 |
| C  | -0.62267700 | -2.16088000 | -0.89755600 |
| C  | -0.61162000 | -0.89581200 | -1.60909700 |
| C  | -1.95792500 | -0.46705700 | -1.78466900 |
| C  | -2.80608900 | -1.40987600 | -1.10953200 |
| C  | -2.46673600 | -3.71797000 | 0.08347700  |
| H  | -2.81314900 | -4.45609000 | -0.64950700 |
| H  | -3.31233600 | -3.50215100 | 0.74322500  |
| H  | -1.68687900 | -4.19796700 | 0.67983500  |
| C  | 0.58729500  | -2.98904700 | -0.58336100 |
| H  | 0.42486800  | -3.63096700 | 0.28612400  |
| H  | 1.46381500  | -2.36908400 | -0.38299600 |
| H  | 0.83601500  | -3.64309600 | -1.42749200 |
| C  | 0.58896500  | -0.22128100 | -2.20684800 |
| H  | 0.58053800  | -0.33593100 | -3.29723100 |
| H  | 1.52366900  | -0.64724900 | -1.83945500 |
| H  | 0.60318100  | 0.85092400  | -1.99107300 |
| C  | -2.39750300 | 0.72993700  | -2.57588400 |
| H  | -2.50101000 | 0.47741400  | -3.63746400 |
| H  | -1.67040600 | 1.54475800  | -2.50995300 |
| H  | -3.36749400 | 1.10701300  | -2.24056200 |
| C  | -4.30640100 | -1.42086400 | -1.12159500 |
| H  | -4.67571000 | -1.98120800 | -1.98899300 |
| H  | -4.72017400 | -0.41126500 | -1.18867800 |
| H  | -4.71575200 | -1.89671300 | -0.22736100 |
| C  | -2.63947700 | -0.75009800 | 2.10768800  |
| H  | -2.89440900 | 0.26432600  | 2.41210000  |
| H  | -3.46743700 | -1.45053100 | 2.08831600  |

|   |             |             |             |
|---|-------------|-------------|-------------|
| C | -1.32318700 | -1.23854300 | 2.35128100  |
| H | -1.16496300 | -2.31573700 | 2.33293200  |
| C | -0.20838500 | -0.41383000 | 2.32596400  |
| C | 1.20978500  | -0.89225700 | 2.33482600  |
| H | 1.24580200  | -1.96228900 | 2.10043200  |
| H | 1.61045900  | -0.78098100 | 3.35361900  |
| C | 2.09793800  | -0.09944100 | 1.35969200  |
| H | 1.62637900  | -0.11115500 | 0.37009700  |
| H | 2.12214800  | 0.95471500  | 1.66429300  |
| C | 3.52496000  | -0.64467600 | 1.25778900  |
| H | 3.49055300  | -1.70901700 | 0.98267000  |
| H | 4.00522600  | -0.60305400 | 2.24454900  |
| C | 4.37766600  | 0.11624500  | 0.23610200  |
| H | 3.88787300  | 0.07327000  | -0.74850700 |
| H | 4.41063900  | 1.17976800  | 0.51048400  |
| C | 5.80654600  | -0.42413000 | 0.11407800  |
| H | 5.77141700  | -1.48950400 | -0.15557800 |
| H | 6.29733900  | -0.37595200 | 1.09619600  |
| C | 6.65514100  | 0.33208300  | -0.91509700 |
| H | 6.16153500  | 0.28365100  | -1.89563100 |
| H | 6.68826900  | 1.39576700  | -0.64332700 |
| C | 8.08107400  | -0.21517200 | -1.02906000 |
| H | 8.07673700  | -1.26892700 | -1.33013900 |
| H | 8.66483200  | 0.34075100  | -1.76907900 |
| H | 8.60690800  | -0.14756200 | -0.07011800 |
| H | -0.35394000 | 0.65607200  | 2.46873500  |
| C | -3.70722400 | 2.65310500  | 0.36150300  |
| H | -4.05685200 | 3.25771000  | 1.20405200  |
| H | -4.02650000 | 1.61793200  | 0.49252600  |
| H | -4.14536700 | 3.06343000  | -0.55288700 |
| C | -2.23147400 | 2.71470600  | 0.27504200  |
| O | -1.61524000 | 3.88908200  | 0.04690700  |
| N | -1.41009100 | 1.72517500  | 0.39252800  |
| O | -0.11633600 | 2.27333200  | 0.22081800  |
| C | -0.24337000 | 3.62483500  | 0.00484100  |
| O | 0.62406700  | 4.40555700  | -0.18158200 |

**<sup>3</sup>Co-TS6**

|    |             |             |             |
|----|-------------|-------------|-------------|
| Co | -1.61708600 | -0.36788900 | 0.30187900  |
| C  | -1.98646500 | -2.52014700 | -0.01569200 |
| C  | -0.60172300 | -2.25152300 | -0.39954800 |
| C  | -0.61395400 | -1.29421100 | -1.43086600 |
| C  | -2.00599600 | -0.96192800 | -1.71058700 |
| C  | -2.84805100 | -1.74118300 | -0.83628500 |



|   |             |             |             |
|---|-------------|-------------|-------------|
| C | -2.41694100 | -3.55435500 | 0.97437400  |
| H | -2.51901200 | -4.52262500 | 0.46876400  |
| H | -3.38623300 | -3.31921900 | 1.41929100  |
| H | -1.68800900 | -3.69070100 | 1.77615200  |
| C | 0.59105200  | -2.94904500 | 0.17443900  |
| H | 0.48265400  | -3.12628000 | 1.24700400  |
| H | 1.51016700  | -2.38476600 | 0.01468900  |
| H | 0.70917000  | -3.92961000 | -0.30236900 |
| C | 0.53940500  | -0.68920400 | -2.16752000 |
| H | 0.43625200  | -0.87092700 | -3.24283300 |
| H | 1.49445400  | -1.10541400 | -1.84595300 |
| H | 0.56612300  | 0.39449400  | -2.01288600 |
| C | -2.42853000 | -0.11281100 | -2.86196300 |
| H | -2.22511100 | -0.65589500 | -3.79341200 |
| H | -1.85526300 | 0.81683700  | -2.89587800 |
| H | -3.49205500 | 0.12287200  | -2.84061200 |
| C | -4.34555600 | -1.79556400 | -0.86204700 |
| H | -4.68390200 | -2.58088000 | -1.54805800 |
| H | -4.78038900 | -0.85390800 | -1.20339900 |
| H | -4.75865900 | -2.01996500 | 0.12389500  |
| C | -2.56304500 | -0.28175200 | 2.13274900  |
| H | -2.86731800 | 0.76244800  | 2.14819000  |
| H | -3.35146400 | -1.00903100 | 2.29459700  |
| C | -1.22056300 | -0.63251400 | 2.43064400  |
| H | -1.00141900 | -1.66958500 | 2.67407900  |
| C | -0.14911000 | 0.24113900  | 2.26519400  |
| C | 1.27278400  | -0.16578400 | 2.39055800  |
| H | 1.35779200  | -1.24476300 | 2.56374300  |
| H | 1.67633200  | 0.33493500  | 3.28470700  |
| C | 2.12454500  | 0.26556900  | 1.17347100  |
| H | 1.62720000  | -0.08477500 | 0.26271100  |
| H | 2.12763700  | 1.35638100  | 1.10425800  |
| C | 3.55120300  | -0.28544200 | 1.23208700  |
| H | 3.52356400  | -1.38060500 | 1.33603900  |
| H | 4.05361800  | 0.09149100  | 2.13275100  |
| C | 4.37159500  | 0.08683800  | -0.00870800 |
| H | 3.86268200  | -0.29279600 | -0.90816200 |
| H | 4.39384300  | 1.17977900  | -0.11369900 |
| C | 5.80499600  | -0.45461700 | 0.02688700  |
| H | 5.77989300  | -1.54820200 | 0.13982300  |
| H | 6.31508300  | -0.06896600 | 0.92045500  |
| C | 6.62075300  | -0.09127800 | -1.21966200 |
| H | 6.10775200  | -0.47616300 | -2.11206400 |
| H | 6.64383400  | 1.00116100  | -1.32922500 |

|   |             |             |             |
|---|-------------|-------------|-------------|
| C | 8.05185400  | -0.63499600 | -1.17381200 |
| H | 8.05708300  | -1.72813800 | -1.09512100 |
| H | 8.61172900  | -0.36256000 | -2.07362000 |
| H | 8.59625300  | -0.23858700 | -0.30954600 |
| H | -0.33667100 | 1.29686100  | 2.08410300  |
| C | -3.57206000 | 2.33959500  | -0.89459800 |
| H | -4.18593900 | 2.96766500  | -0.24334900 |
| H | -3.92212100 | 1.30916000  | -0.84436300 |
| H | -3.66893000 | 2.72350700  | -1.91314500 |
| C | -2.13107900 | 2.46788500  | -0.44269400 |
| O | -1.70525600 | 3.68502200  | -0.37130700 |
| N | -1.40811300 | 1.42810800  | -0.14391300 |
| O | 0.22605300  | 2.75215300  | 0.58360400  |
| C | -0.20049700 | 3.87183800  | 0.23533400  |
| O | 0.13417800  | 5.01331700  | 0.21502300  |

**<sup>3</sup>Co-7**

|    |             |             |             |
|----|-------------|-------------|-------------|
| Co | -1.72266400 | 0.09637100  | 0.34933000  |
| C  | -3.14433900 | -0.62841100 | -1.06463700 |
| C  | -2.40846700 | -1.75023700 | -0.55211200 |
| C  | -1.01683800 | -1.59711400 | -0.90793800 |
| C  | -0.87807500 | -0.37097600 | -1.60090800 |
| C  | -2.20384000 | 0.24316400  | -1.69432300 |
| C  | -4.62968800 | -0.43738600 | -1.02432400 |
| H  | -5.07880500 | -0.78327800 | -1.96274800 |
| H  | -4.89311400 | 0.61543300  | -0.90103800 |
| H  | -5.09114900 | -1.00218200 | -0.21189400 |
| C  | -3.01553400 | -2.95675400 | 0.09224300  |
| H  | -3.41550600 | -3.61832600 | -0.68528800 |
| H  | -3.84791700 | -2.69886900 | 0.75126600  |
| H  | -2.28567700 | -3.53435800 | 0.66263800  |
| C  | 0.06670600  | -2.59666100 | -0.64386400 |
| H  | 0.12832800  | -3.30989500 | -1.47434100 |
| H  | -0.12232700 | -3.17447300 | 0.26358900  |
| H  | 1.04284000  | -2.11896000 | -0.54615000 |
| C  | 0.35406400  | 0.16899200  | -2.25065200 |
| H  | 0.25899500  | 0.06928200  | -3.33894300 |
| H  | 1.24820100  | -0.37595900 | -1.94408600 |
| H  | 0.48204800  | 1.23016300  | -2.02616800 |
| C  | -2.53334800 | 1.48090900  | -2.46266700 |
| H  | -2.76038200 | 1.20358100  | -3.50002200 |
| H  | -1.70123400 | 2.18360800  | -2.45704900 |
| H  | -3.41382600 | 1.98003900  | -2.05292900 |
| C  | -2.92344300 | -0.09721200 | 2.04815900  |

|   |             |             |             |
|---|-------------|-------------|-------------|
| H | -3.04477700 | 0.93711100  | 2.35333600  |
| H | -3.83801700 | -0.66734700 | 1.93411400  |
| C | -1.70347100 | -0.77972200 | 2.26876400  |
| H | -1.68184500 | -1.86489100 | 2.20906500  |
| C | -0.48606500 | -0.09579600 | 2.32419700  |
| C | 0.86231400  | -0.73105200 | 2.28662400  |
| H | 0.78421200  | -1.78257100 | 1.99241500  |
| H | 1.26892100  | -0.71741400 | 3.30955400  |
| C | 1.83303600  | 0.02334200  | 1.35576200  |
| H | 1.36261700  | 0.12915400  | 0.37152500  |
| H | 1.97467600  | 1.04470500  | 1.73247400  |
| C | 3.19169700  | -0.66768500 | 1.21211200  |
| H | 3.04077700  | -1.70274100 | 0.87219800  |
| H | 3.67373500  | -0.74036300 | 2.19600400  |
| C | 4.12084300  | 0.05834100  | 0.23235200  |
| H | 3.62600200  | 0.13591600  | -0.74732200 |
| H | 4.27458700  | 1.09095300  | 0.57493800  |
| C | 5.47915400  | -0.63067600 | 0.06132700  |
| H | 5.32280400  | -1.66493400 | -0.27767500 |
| H | 5.97471100  | -0.70362000 | 1.03946300  |
| C | 6.40474000  | 0.09216900  | -0.92463300 |
| H | 5.90548600  | 0.16638100  | -1.90056400 |
| H | 6.55981900  | 1.12434000  | -0.58287400 |
| C | 7.75846700  | -0.60478300 | -1.09006200 |
| H | 7.63313600  | -1.62836100 | -1.46102400 |
| H | 8.39903900  | -0.06979400 | -1.79763200 |
| H | 8.29178500  | -0.66211900 | -0.13462600 |
| H | -0.50983900 | 0.95999900  | 2.58136500  |
| C | -0.08369400 | 3.73394100  | 1.34726600  |
| H | -0.94134900 | 3.99503000  | 1.97359100  |
| H | 0.38673100  | 4.63851600  | 0.95827500  |
| H | 0.64113700  | 3.19748400  | 1.97040100  |
| C | -0.50097900 | 2.85866700  | 0.18256700  |
| N | -1.32557800 | 1.81453300  | 0.49627000  |
| O | -0.14041000 | 3.06557900  | -0.97764300 |

**<sup>3</sup>Co-TS8**

|    |            |             |             |
|----|------------|-------------|-------------|
| Co | 1.82035400 | -0.14465600 | -0.53188800 |
| C  | 3.80714000 | -0.45071600 | 0.32931600  |
| C  | 3.15987300 | -1.70745200 | 0.20231000  |
| C  | 1.96096600 | -1.70682600 | 1.04794800  |
| C  | 1.85343900 | -0.44535500 | 1.65176400  |
| C  | 2.99306600 | 0.35222700  | 1.19737900  |
| C  | 5.10065400 | -0.02480700 | -0.29800600 |

|   |             |             |             |
|---|-------------|-------------|-------------|
| H | 5.93004600  | -0.14124900 | 0.40911800  |
| H | 5.06864100  | 1.02527500  | -0.59981800 |
| H | 5.33385100  | -0.62003200 | -1.18321900 |
| C | 3.68303300  | -2.89980500 | -0.53611900 |
| H | 4.30858400  | -3.50035900 | 0.13559800  |
| H | 4.29910100  | -2.61233100 | -1.39048800 |
| H | 2.87934300  | -3.54959600 | -0.89022700 |
| C | 1.06280900  | -2.88753200 | 1.26122900  |
| H | 1.45986500  | -3.52385300 | 2.06072500  |
| H | 0.98562300  | -3.51247600 | 0.36743000  |
| H | 0.05543300  | -2.58305300 | 1.55383100  |
| C | 0.81395400  | 0.04844500  | 2.60962000  |
| H | 1.25816800  | 0.22126700  | 3.59647800  |
| H | 0.00476700  | -0.67335500 | 2.73250600  |
| H | 0.38784200  | 0.99402100  | 2.26138100  |
| C | 3.34151200  | 1.70260300  | 1.72797100  |
| H | 3.93698600  | 1.57500700  | 2.64127500  |
| H | 2.45179100  | 2.27615400  | 1.99258300  |
| H | 3.94319100  | 2.27760000  | 1.02183500  |
| C | 1.40712700  | -1.14599900 | -2.42195800 |
| H | 1.66904500  | -0.33400800 | -3.09426400 |
| H | 1.90238200  | -2.09621200 | -2.58070800 |
| C | 0.29113200  | -1.06593000 | -1.59686900 |
| H | -0.05047400 | -1.94586800 | -1.05649000 |
| C | -0.37436400 | 0.17939200  | -1.30858700 |
| C | -1.45630500 | 0.25147500  | -0.28665600 |
| H | -1.44592100 | 1.23948400  | 0.17813400  |
| H | -1.28388300 | -0.48911800 | 0.50206000  |
| C | -2.83287400 | 0.00002800  | -0.95644400 |
| H | -2.99239600 | 0.74406200  | -1.74713400 |
| H | -2.83534400 | -0.98321200 | -1.44514600 |
| C | -3.97732900 | 0.07484000  | 0.06286900  |
| H | -3.96077900 | 1.05831100  | 0.55111600  |
| H | -3.80680500 | -0.66670200 | 0.85577300  |
| C | -5.35225100 | -0.16238900 | -0.57256800 |
| H | -5.51845800 | 0.57985800  | -1.36554500 |
| H | -5.36159900 | -1.14452900 | -1.06584300 |
| C | -6.50111000 | -0.09066600 | 0.44042200  |
| H | -6.48932700 | 0.89096000  | 0.93479100  |
| H | -6.33409900 | -0.83312600 | 1.23386200  |
| C | -7.87893500 | -0.32431700 | -0.19098700 |
| H | -8.04308600 | 0.41845600  | -0.98326200 |
| H | -7.88764500 | -1.30489300 | -0.68598700 |
| C | -9.02014700 | -0.25131000 | 0.82791000  |

|   |             |             |             |
|---|-------------|-------------|-------------|
| H | -9.05307100 | 0.73037400  | 1.31378600  |
| H | -9.99119600 | -0.42069700 | 0.35273100  |
| H | -8.89691700 | -1.00544900 | 1.61350000  |
| H | -0.39261100 | 0.92084000  | -2.09992900 |
| C | 1.91964400  | 3.88491500  | -0.71830600 |
| H | 1.89522000  | 4.62491400  | 0.08360000  |
| H | 1.45312200  | 4.31443600  | -1.61181100 |
| H | 2.94989200  | 3.62884300  | -0.97812200 |
| C | 1.12567600  | 2.66386400  | -0.29059100 |
| N | 1.45734500  | 1.52123100  | -0.99656100 |
| O | 0.25743500  | 2.71365700  | 0.57911100  |

**<sup>3</sup>Co-9**

|    |            |             |             |
|----|------------|-------------|-------------|
| Co | 1.74113000 | -0.05307900 | -0.32868800 |
| C  | 3.89137200 | -0.36233300 | 0.15441000  |
| C  | 3.22123100 | -1.62241100 | -0.19271700 |
| C  | 2.21566200 | -1.88861300 | 0.78048800  |
| C  | 2.18941700 | -0.77271200 | 1.67670100  |
| C  | 3.26309700 | 0.15903100  | 1.29570400  |
| C  | 5.08388900 | 0.20090000  | -0.55793700 |
| H  | 6.00368500 | -0.25210000 | -0.16938400 |
| H  | 5.16348500 | 1.28084900  | -0.41875600 |
| H  | 5.05433500 | -0.00266000 | -1.63098600 |
| C  | 3.62810300 | -2.52409900 | -1.31574200 |
| H  | 4.44012400 | -3.18372700 | -0.98537400 |
| H  | 4.00062600 | -1.96286300 | -2.17584400 |
| H  | 2.80494000 | -3.16059300 | -1.64760200 |
| C  | 1.32374600 | -3.09393900 | 0.85039000  |
| H  | 1.73226900 | -3.83027600 | 1.55209200  |
| H  | 1.22812600 | -3.58502100 | -0.12051400 |
| H  | 0.32113900 | -2.83192100 | 1.19751000  |
| C  | 1.33600200 | -0.61987200 | 2.88830700  |
| H  | 1.93299300 | -0.86685200 | 3.77664700  |
| H  | 0.47555900 | -1.29072700 | 2.86760300  |
| H  | 0.98841200 | 0.40983700  | 2.98148100  |
| C  | 3.60968200 | 1.39328900  | 2.06145400  |
| H  | 3.99045300 | 1.11946400  | 3.05283200  |
| H  | 2.72105700 | 2.01367700  | 2.20600500  |
| H  | 4.37977500 | 1.97933100  | 1.55717200  |
| C  | 2.16077700 | 0.76389200  | -2.47404400 |
| H  | 2.40789200 | 1.76430100  | -2.12602900 |
| H  | 2.93412400 | 0.22480500  | -3.01085900 |
| C  | 0.90005600 | 0.26210300  | -2.37931300 |
| H  | 0.67642800 | -0.69236500 | -2.85592500 |

|   |             |             |             |
|---|-------------|-------------|-------------|
| C | -0.23630600 | 0.97383600  | -1.62475100 |
| C | -1.48185900 | 0.06593800  | -1.60483500 |
| H | -1.18452600 | -0.89606900 | -1.15965200 |
| H | -1.76437900 | -0.14421200 | -2.64537300 |
| C | -2.68803300 | 0.61858500  | -0.84617600 |
| H | -2.39612200 | 0.85109700  | 0.18599000  |
| H | -3.00915800 | 1.56257800  | -1.30718400 |
| C | -3.87030500 | -0.35826700 | -0.82607900 |
| H | -3.55049100 | -1.30421400 | -0.36584400 |
| H | -4.15915300 | -0.60259400 | -1.85766100 |
| C | -5.08726700 | 0.18870300  | -0.07154900 |
| H | -4.79468400 | 0.43604900  | 0.95888400  |
| H | -5.40473600 | 1.13424200  | -0.53324800 |
| C | -6.27026600 | -0.78551300 | -0.04474800 |
| H | -5.95273000 | -1.73136900 | 0.41734700  |
| H | -6.56028900 | -1.03369900 | -1.07564100 |
| C | -7.48978000 | -0.23874500 | 0.70695600  |
| H | -7.19780900 | 0.00948600  | 1.73647000  |
| H | -7.80491800 | 0.70602800  | 0.24376200  |
| C | -8.66601600 | -1.21949600 | 0.72732300  |
| H | -8.38666500 | -2.16092300 | 1.21399700  |
| H | -9.52241800 | -0.80587300 | 1.26860700  |
| H | -8.99778700 | -1.45864900 | -0.28937500 |
| H | -0.47133000 | 1.92738300  | -2.11579300 |
| C | -0.71911800 | 3.39834800  | 0.04642400  |
| H | -1.72682900 | 3.09732400  | -0.24537100 |
| H | -0.24087200 | 3.85193200  | -0.82899100 |
| H | -0.78053500 | 4.13986500  | 0.84209800  |
| C | 0.10306800  | 2.22815900  | 0.56159200  |
| N | 0.35478000  | 1.16687000  | -0.29045000 |
| O | 0.58164500  | 2.24409900  | 1.69293500  |

**<sup>5</sup>Co-1**

|    |             |             |             |
|----|-------------|-------------|-------------|
| Co | 0.57227400  | 0.03248800  | -0.04671100 |
| C  | -1.41531600 | 0.50484700  | 1.12296500  |
| C  | -1.45264400 | -0.93706600 | 0.80000800  |
| C  | -1.44774000 | -1.06785300 | -0.59520500 |
| C  | -1.42163500 | 0.28378100  | -1.17102900 |
| C  | -1.35626400 | 1.23899100  | -0.09646900 |
| C  | -1.47854100 | 1.06178100  | 2.50388900  |
| H  | -2.52268000 | 1.07245000  | 2.84682000  |
| H  | -1.10831700 | 2.08743500  | 2.55061700  |
| H  | -0.91955600 | 0.44950200  | 3.21721900  |
| C  | -1.51614000 | -2.02047400 | 1.82784700  |

|   |             |             |             |
|---|-------------|-------------|-------------|
| H | -2.49955900 | -2.02057700 | 2.31433700  |
| H | -0.77100100 | -1.87457200 | 2.61648200  |
| H | -1.35858900 | -3.00668600 | 1.38974500  |
| C | -1.51752400 | -2.32697000 | -1.40366600 |
| H | -2.51510900 | -2.43974500 | -1.84477100 |
| H | -1.31886900 | -3.20971700 | -0.79447400 |
| H | -0.79858200 | -2.31905800 | -2.22848500 |
| C | -1.51824000 | 0.59453300  | -2.62569000 |
| H | -2.57684500 | 0.62608300  | -2.92052300 |
| H | -1.04047100 | -0.17195100 | -3.24125800 |
| H | -1.08668700 | 1.56797300  | -2.86789300 |
| C | -1.37430500 | 2.73384300  | -0.24396900 |
| H | -2.40466500 | 3.09959000  | -0.31838900 |
| H | -0.84245000 | 3.05583100  | -1.14219100 |
| H | -0.90670500 | 3.22676300  | 0.61085500  |
| O | 2.27656400  | 1.06943900  | 0.00266600  |
| O | 2.20638000  | -1.10910400 | -0.00084400 |
| C | 2.92204700  | -0.04148600 | 0.02005500  |
| C | 4.41272000  | -0.08985200 | 0.03205600  |
| H | 4.75648100  | -0.99775600 | 0.52939600  |
| H | 4.76418500  | -0.11338500 | -1.00600600 |
| H | 4.81596800  | 0.80350600  | 0.51039700  |

**<sup>5</sup>Co-2**

|    |             |             |             |
|----|-------------|-------------|-------------|
| Co | -1.53492900 | 0.28966700  | 0.24658900  |
| C  | -1.62686800 | -1.95580100 | -0.62617500 |
| C  | -1.25382700 | -0.95482000 | -1.59810400 |
| C  | -2.41727600 | -0.18059200 | -1.86560000 |
| C  | -3.49316300 | -0.64587000 | -0.98280500 |
| C  | -3.00160900 | -1.72464300 | -0.23075200 |
| C  | -0.77295700 | -3.09680400 | -0.18629800 |
| H  | -0.87328100 | -3.92518100 | -0.90091600 |
| H  | -1.06992200 | -3.48286000 | 0.79163700  |
| H  | 0.28516200  | -2.82836300 | -0.15410500 |
| C  | 0.05915700  | -0.87782000 | -2.32487600 |
| H  | 0.03500700  | -1.48657700 | -3.23600200 |
| H  | 0.88295700  | -1.24139100 | -1.70608000 |
| H  | 0.29358400  | 0.14949800  | -2.61281100 |
| C  | -2.56663900 | 0.92562800  | -2.85306900 |
| H  | -3.20784800 | 0.60315500  | -3.68335200 |
| H  | -1.60661500 | 1.23365300  | -3.27037400 |
| H  | -3.04830600 | 1.79185700  | -2.38937000 |
| C  | -4.84435800 | -0.01521300 | -0.93695800 |
| H  | -5.33355800 | -0.08456100 | -1.91568600 |

|   |             |             |             |
|---|-------------|-------------|-------------|
| H | -4.75571000 | 1.04860500  | -0.69109400 |
| H | -5.49572900 | -0.48886800 | -0.20111600 |
| C | -3.74853200 | -2.55003600 | 0.77161800  |
| H | -4.02347200 | -3.52207400 | 0.34558200  |
| H | -4.66951100 | -2.06021300 | 1.09340400  |
| H | -3.14596600 | -2.75454200 | 1.66257900  |
| O | -0.43053700 | 1.93184300  | 0.13481900  |
| O | -2.61652600 | 2.13349600  | 0.16335300  |
| C | -1.47830900 | 2.69224800  | 0.11422200  |
| C | -1.31563700 | 4.17839500  | 0.04010900  |
| H | -2.28534500 | 4.67404300  | 0.01086500  |
| H | -0.74374800 | 4.51941200  | 0.90848700  |
| H | -0.73045200 | 4.43202000  | -0.84876900 |
| C | -2.15045800 | 0.11554600  | 2.53336700  |
| H | -2.14757900 | 1.18579400  | 2.72776900  |
| H | -3.12137400 | -0.36714800 | 2.48587600  |
| C | -0.99883000 | -0.59906200 | 2.49582900  |
| H | -1.06804800 | -1.68047600 | 2.37654900  |
| C | 0.38885600  | -0.04342100 | 2.65570600  |
| H | 0.35596300  | 1.05101000  | 2.64211700  |
| H | 0.76469500  | -0.34795500 | 3.64218100  |
| C | 1.35230100  | -0.55812000 | 1.57051100  |
| H | 0.94080700  | -0.32920300 | 0.57392800  |
| H | 1.41982900  | -1.65225600 | 1.63416500  |
| C | 2.75076500  | 0.05792200  | 1.65347400  |
| H | 2.66389200  | 1.15117500  | 1.60302700  |
| H | 3.19110900  | -0.17590100 | 2.63218700  |
| C | 3.67758600  | -0.43445200 | 0.53636700  |
| H | 3.22461100  | -0.19660900 | -0.43800400 |
| H | 3.75323300  | -1.53047600 | 0.58120500  |
| C | 5.08277700  | 0.17426100  | 0.60068500  |
| H | 5.00469700  | 1.26976500  | 0.56095400  |
| H | 5.53586200  | -0.06401600 | 1.57296200  |
| C | 6.00461100  | -0.31176500 | -0.52323300 |
| H | 5.54963500  | -0.07377500 | -1.49584700 |
| H | 6.08067200  | -1.40791500 | -0.48346400 |
| C | 7.41112300  | 0.29565800  | -0.46067300 |
| H | 7.33314200  | 1.39064800  | -0.49910400 |
| H | 7.86376300  | 0.05679800  | 0.51108400  |
| C | 8.32360500  | -0.19576700 | -1.58834900 |
| H | 7.90962700  | 0.05904900  | -2.57071600 |
| H | 9.31987300  | 0.25180600  | -1.52058600 |
| H | 8.44403000  | -1.28447700 | -1.55240100 |



**<sup>5</sup>Co-TS3**

|    |              |              |              |
|----|--------------|--------------|--------------|
| Co | 2. 22785600  | 0. 14694600  | -0. 70448600 |
| C  | 3. 37695200  | -1. 57700500 | 0. 75431300  |
| C  | 2. 37620100  | -0. 89796000 | 1. 54936700  |
| C  | 2. 65999800  | 0. 51671000  | 1. 53703800  |
| C  | 3. 82788900  | 0. 71120100  | 0. 76450900  |
| C  | 4. 26605600  | -0. 60691100 | 0. 26081000  |
| C  | 3. 42858900  | -3. 05571000 | 0. 52955900  |
| H  | 3. 72508300  | -3. 57683700 | 1. 44730400  |
| H  | 4. 14726600  | -3. 32352200 | -0. 24689100 |
| H  | 2. 45289000  | -3. 45772600 | 0. 23688800  |
| C  | 1. 24802000  | -1. 53690700 | 2. 28606000  |
| H  | 0. 31939600  | -0. 96872800 | 2. 16840500  |
| H  | 1. 46670800  | -1. 56217900 | 3. 36212900  |
| H  | 1. 07503300  | -2. 56548800 | 1. 96371400  |
| C  | 1. 89236100  | 1. 55588000  | 2. 29906800  |
| H  | 2. 07913900  | 2. 55740200  | 1. 90579000  |
| H  | 2. 18772800  | 1. 55581500  | 3. 35464600  |
| H  | 0. 81602200  | 1. 37156800  | 2. 25479700  |
| C  | 4. 56707500  | 1. 99389800  | 0. 54890800  |
| H  | 3. 91763000  | 2. 86045200  | 0. 68436400  |
| H  | 5. 00393200  | 2. 04855900  | -0. 45205000 |
| H  | 5. 39330300  | 2. 07746100  | 1. 26661600  |
| C  | 5. 49522000  | -0. 82456400 | -0. 56328500 |
| H  | 6. 39074300  | -0. 77570700 | 0. 06936300  |
| H  | 5. 60894200  | -0. 05567800 | -1. 33341500 |
| H  | 5. 48973400  | -1. 79917400 | -1. 05451600 |
| O  | -0. 56004000 | 1. 44581400  | -0. 13271000 |
| O  | 1. 42524000  | 1. 88403100  | -1. 08754200 |
| C  | 0. 31021000  | 2. 25930100  | -0. 58776200 |
| C  | -0. 00642100 | 3. 72616800  | -0. 55070300 |
| H  | 0. 90765200  | 4. 32008000  | -0. 56181400 |
| H  | -0. 59120600 | 3. 97058800  | -1. 44514700 |
| H  | -0. 62108900 | 3. 95871100  | 0. 32042600  |
| C  | 1. 65252400  | -1. 36580200 | -2. 02771800 |
| H  | 1. 58868700  | -0. 84417300 | -2. 98596700 |
| H  | 2. 39870400  | -2. 15533500 | -1. 98970600 |
| C  | 0. 45207200  | -1. 56157800 | -1. 30456000 |
| H  | 0. 49163700  | -2. 28762400 | -0. 48947300 |
| C  | -0. 74825100 | -0. 83326700 | -1. 42680300 |
| H  | -0. 51381100 | 0. 31492800  | -0. 66208400 |
| H  | -0. 87599600 | -0. 31510700 | -2. 38393900 |
| C  | -2. 03406500 | -1. 36867400 | -0. 79850300 |
| H  | -1. 82829900 | -1. 69457400 | 0. 23115300  |

|   |              |             |             |
|---|--------------|-------------|-------------|
| H | -2.34554900  | -2.27024600 | -1.34530500 |
| C | -3.19271800  | -0.36282700 | -0.80246000 |
| H | -2.90607400  | 0.53509100  | -0.24192700 |
| H | -3.37754400  | -0.03499800 | -1.83508000 |
| C | -4.48311500  | -0.94514600 | -0.21564800 |
| H | -4.29409700  | -1.28244200 | 0.81367100  |
| H | -4.77003100  | -1.84236000 | -0.78173300 |
| C | -5.64823600  | 0.05093900  | -0.21656800 |
| H | -5.35835100  | 0.94910400  | 0.34749900  |
| H | -5.83757200  | 0.38657500  | -1.24600400 |
| C | -6.93919700  | -0.52570100 | 0.37508600  |
| H | -6.74907300  | -0.86297000 | 1.40420900  |
| H | -7.22854500  | -1.42354900 | -0.18936800 |
| C | -8.10557500  | 0.46960200  | 0.37589300  |
| H | -7.81428500  | 1.36658500  | 0.93948700  |
| H | -8.29436100  | 0.80487900  | -0.65299200 |
| C | -9.38984000  | -0.11686700 | 0.96976600  |
| H | -9.23656900  | -0.43087800 | 2.00857400  |
| H | -10.20596400 | 0.61225300  | 0.95884400  |
| H | -9.72001200  | -0.99574000 | 0.40447900  |

**<sup>5</sup>Co-4**

|    |             |             |             |
|----|-------------|-------------|-------------|
| Co | -2.56638800 | 0.69007800  | -0.32297400 |
| C  | -2.82585100 | -0.74031500 | 1.38517600  |
| C  | -1.51923800 | -0.97085900 | 0.84315400  |
| C  | -1.66751000 | -1.33518300 | -0.53310700 |
| C  | -3.07764600 | -1.34275400 | -0.84583500 |
| C  | -3.79375900 | -0.97677800 | 0.34573300  |
| C  | -3.13578500 | -0.37652200 | 2.80703800  |
| H  | -3.25530700 | -1.28276200 | 3.41352100  |
| H  | -4.06540700 | 0.19196700  | 2.88988200  |
| H  | -2.33481900 | 0.21235500  | 3.26154200  |
| C  | -0.23161400 | -0.89084700 | 1.60747600  |
| H  | 0.61734600  | -0.68652000 | 0.95295500  |
| H  | -0.03026100 | -1.84049400 | 2.11756500  |
| H  | -0.26197500 | -0.11350900 | 2.37585400  |
| C  | -0.56478300 | -1.72645700 | -1.47183800 |
| H  | -0.81705800 | -1.50335800 | -2.51153600 |
| H  | -0.37478500 | -2.80482300 | -1.40852300 |
| H  | 0.37156600  | -1.21667800 | -1.23474800 |
| C  | -3.69036300 | -1.78486200 | -2.14378600 |
| H  | -3.04449200 | -1.56238600 | -2.99676600 |
| H  | -4.65797500 | -1.30876800 | -2.31954100 |
| H  | -3.85640100 | -2.86881000 | -2.13448500 |

|   |             |             |             |
|---|-------------|-------------|-------------|
| C | -5.28678700 | -0.95083000 | 0.50606000  |
| H | -5.65184900 | -1.93660600 | 0.81823300  |
| H | -5.79216900 | -0.69797800 | -0.42918500 |
| H | -5.60299400 | -0.23176400 | 1.26578500  |
| C | -2.17626700 | 2.69016800  | -0.65015800 |
| H | -2.16765100 | 2.83700500  | -1.73193000 |
| H | -2.98917900 | 3.18688400  | -0.11753200 |
| C | -0.94307300 | 2.48886400  | 0.02549400  |
| H | -0.94037100 | 2.57462400  | 1.11224500  |
| C | 0.27587900  | 2.24037500  | -0.60326400 |
| H | 0.28593500  | 2.18853800  | -1.69290800 |
| C | 1.58074300  | 2.10670900  | 0.10099000  |
| H | 1.41902300  | 1.88576100  | 1.16352100  |
| H | 2.08081300  | 3.09006400  | 0.07195400  |
| C | 2.53209100  | 1.07507300  | -0.53558900 |
| H | 2.04971800  | 0.08903400  | -0.54967300 |
| H | 2.70598600  | 1.34486600  | -1.58552500 |
| C | 3.87065200  | 0.97377200  | 0.20309700  |
| H | 3.68671100  | 0.71456800  | 1.25526900  |
| H | 4.35437300  | 1.96008300  | 0.21154200  |
| C | 4.81948500  | -0.05760900 | -0.41798500 |
| H | 4.33071300  | -1.04262100 | -0.42726200 |
| H | 5.00035500  | 0.20282400  | -1.47020200 |
| C | 6.16016000  | -0.16313100 | 0.31789800  |
| H | 5.97827600  | -0.42187000 | 1.37080300  |
| H | 6.64780400  | 0.82179900  | 0.32701600  |
| C | 7.11149900  | -1.19427800 | -0.30100200 |
| H | 6.62181400  | -2.17771000 | -0.31002500 |
| H | 7.29101900  | -0.93365500 | -1.35281700 |
| C | 8.44797200  | -1.29112300 | 0.44081100  |
| H | 8.29872100  | -1.58120600 | 1.48702900  |
| H | 9.10789900  | -2.03251200 | -0.01987600 |
| H | 8.97226800  | -0.32893000 | 0.43593400  |

**<sup>5</sup>Co-5**

|    |             |             |             |
|----|-------------|-------------|-------------|
| Co | -1.44256600 | -0.36729900 | 0.28467300  |
| C  | -2.11050000 | -2.43623200 | -0.29042500 |
| C  | -0.69795600 | -2.27073900 | -0.49130900 |
| C  | -0.51594000 | -1.26997000 | -1.50812200 |
| C  | -1.81219800 | -0.82555800 | -1.92848500 |
| C  | -2.79534600 | -1.53570600 | -1.16892700 |
| C  | -2.76626800 | -3.43031500 | 0.62266900  |
| H  | -2.93607300 | -4.38169300 | 0.10433900  |
| H  | -3.74110400 | -3.07916300 | 0.97316200  |

|   |             |             |             |
|---|-------------|-------------|-------------|
| H | -2.15179500 | -3.65246400 | 1.49980400  |
| C | 0.38826500  | -3.09274100 | 0.14348800  |
| H | 0.10067700  | -3.45013400 | 1.13611400  |
| H | 1.31791900  | -2.52785700 | 0.24960000  |
| H | 0.61045100  | -3.97793400 | -0.46379300 |
| C | 0.78324400  | -0.83273500 | -2.12241500 |
| H | 0.89303200  | -1.25104800 | -3.13005200 |
| H | 1.64156400  | -1.16581900 | -1.53641400 |
| H | 0.84665200  | 0.25657000  | -2.21722100 |
| C | -2.04937400 | 0.17689000  | -3.02001200 |
| H | -1.82868200 | -0.25885700 | -4.00135500 |
| H | -1.40025900 | 1.05373000  | -2.91365500 |
| H | -3.08614300 | 0.51985800  | -3.04723800 |
| C | -4.28865500 | -1.43493700 | -1.30271000 |
| H | -4.69110700 | -2.30453800 | -1.83524200 |
| H | -4.59238100 | -0.54917600 | -1.86658000 |
| H | -4.78641000 | -1.40190200 | -0.32758500 |
| C | -2.51174700 | -0.37087700 | 2.54438700  |
| H | -2.78567400 | 0.67550200  | 2.64863800  |
| H | -3.30994000 | -1.10027600 | 2.48303300  |
| C | -1.17664200 | -0.77469900 | 2.64184700  |
| H | -0.97166600 | -1.84419500 | 2.60679800  |
| C | -0.07782200 | 0.07582100  | 2.83282800  |
| C | 1.33852700  | -0.38260800 | 2.78970100  |
| H | 1.38355800  | -1.47772100 | 2.81535100  |
| H | 1.88335600  | -0.01359600 | 3.66863800  |
| C | 2.05192200  | 0.13632200  | 1.51581900  |
| H | 1.45079700  | -0.13273400 | 0.63453600  |
| H | 2.08120800  | 1.23181100  | 1.53780200  |
| C | 3.46849200  | -0.42520100 | 1.35749800  |
| H | 3.42192600  | -1.52211400 | 1.29974100  |
| H | 4.05148400  | -0.19328900 | 2.25875800  |
| C | 4.19307200  | 0.12466900  | 0.12347900  |
| H | 3.59765700  | -0.08796600 | -0.77631900 |
| H | 4.25101800  | 1.21958600  | 0.19576700  |
| C | 5.60238300  | -0.45053500 | -0.05676100 |
| H | 5.54246300  | -1.54625000 | -0.12431600 |
| H | 6.19999200  | -0.23379200 | 0.83954500  |
| C | 6.32539800  | 0.09563600  | -1.29377700 |
| H | 5.72456200  | -0.12100200 | -2.18804400 |
| H | 6.38348900  | 1.19021600  | -1.22352600 |
| C | 7.73223700  | -0.48489600 | -1.46576500 |
| H | 7.69947500  | -1.57539600 | -1.56917500 |
| H | 8.22579100  | -0.08011400 | -2.35455700 |

|   |             |             |             |
|---|-------------|-------------|-------------|
| H | 8.36235500  | -0.25363600 | -0.59975300 |
| H | -0.26162300 | 1.14592000  | 2.92024700  |
| C | -3.56345600 | 2.46001700  | -0.74997000 |
| H | -4.21520700 | 3.05477300  | -0.10243600 |
| H | -3.84474400 | 1.40790000  | -0.69555000 |
| H | -3.68053900 | 2.82313700  | -1.77492400 |
| C | -2.15818800 | 2.62452600  | -0.32291600 |
| O | -1.58324400 | 3.83669200  | -0.33620000 |
| N | -1.36301900 | 1.69528000  | 0.10197300  |
| O | -0.13708400 | 2.33640500  | 0.40357900  |
| C | -0.27212300 | 3.67540000  | 0.12861000  |
| O | 0.54287600  | 4.51997500  | 0.25805700  |

**<sup>5</sup>Co-7**

|    |             |             |             |
|----|-------------|-------------|-------------|
| Co | 1.89819100  | 0.34002400  | 0.18934700  |
| C  | 3.27965900  | -1.35158500 | -0.16070100 |
| C  | 2.86737900  | -0.74937900 | -1.41406700 |
| C  | 1.44103200  | -0.96298100 | -1.58301000 |
| C  | 0.97374200  | -1.62383200 | -0.43157900 |
| C  | 2.12355500  | -1.86531500 | 0.46189100  |
| C  | 4.68831200  | -1.40789600 | 0.35394800  |
| H  | 5.23091100  | -2.24231100 | -0.10537600 |
| H  | 4.71367000  | -1.55127000 | 1.43583900  |
| H  | 5.24173400  | -0.49339800 | 0.12324400  |
| C  | 3.79024100  | -0.20423700 | -2.45720000 |
| H  | 4.06519600  | -1.00419200 | -3.15590500 |
| H  | 4.71586900  | 0.18026500  | -2.02365400 |
| H  | 3.32396100  | 0.58982500  | -3.04608100 |
| C  | 0.62740900  | -0.59982000 | -2.79080200 |
| H  | 0.48697000  | -1.47538700 | -3.43483200 |
| H  | 1.11566000  | 0.16736100  | -3.39584100 |
| H  | -0.36496000 | -0.23416400 | -2.51351100 |
| C  | -0.41024100 | -2.11282800 | -0.15950000 |
| H  | -0.42149400 | -3.20966700 | -0.18682700 |
| H  | -1.12118000 | -1.75291700 | -0.90491700 |
| H  | -0.74277400 | -1.80342000 | 0.83488400  |
| C  | 2.02883400  | -2.61191200 | 1.75097400  |
| H  | 1.91675600  | -3.68395600 | 1.54411000  |
| H  | 1.15674600  | -2.28780700 | 2.32331900  |
| H  | 2.92334900  | -2.48264400 | 2.36259200  |
| C  | 2.61441500  | 2.28081100  | -0.44393400 |
| H  | 2.81434700  | 2.71708700  | 0.53425900  |
| H  | 3.47031100  | 2.13893000  | -1.09477900 |
| C  | 1.32792700  | 2.39640500  | -1.00389200 |

|   |             |             |             |
|---|-------------|-------------|-------------|
| H | 1.19841200  | 2.09746500  | -2.04249800 |
| C | 0.19046200  | 2.83083900  | -0.31877600 |
| C | -1.18857100 | 2.71493000  | -0.85491300 |
| H | -1.16946700 | 2.56265600  | -1.94042200 |
| H | -1.75312600 | 3.63475000  | -0.65711900 |
| C | -1.93120000 | 1.52491200  | -0.18243700 |
| H | -1.32480700 | 0.62008000  | -0.30440600 |
| H | -1.99442600 | 1.70179000  | 0.89803500  |
| C | -3.33298000 | 1.29856600  | -0.75472700 |
| H | -3.26366100 | 1.14005700  | -1.84014300 |
| H | -3.93728200 | 2.20464300  | -0.61570800 |
| C | -4.03926000 | 0.10152500  | -0.10609700 |
| H | -3.42745200 | -0.80158900 | -0.24646500 |
| H | -4.09905300 | 0.25881900  | 0.97969800  |
| C | -5.44491200 | -0.14625600 | -0.66512900 |
| H | -5.38349500 | -0.29750000 | -1.75232400 |
| H | -6.05774600 | 0.75392500  | -0.51792600 |
| C | -6.14684300 | -1.34933500 | -0.02368900 |
| H | -5.53125600 | -2.24745400 | -0.17143400 |
| H | -6.20543000 | -1.19582000 | 1.06226100  |
| C | -7.55080900 | -1.58867600 | -0.58706400 |
| H | -7.51676200 | -1.77582700 | -1.66631300 |
| H | -8.02934700 | -2.45144000 | -0.11379000 |
| H | -8.19517900 | -0.71788400 | -0.42259200 |
| H | 0.31644700  | 3.18742400  | 0.70140200  |
| C | -0.24674600 | 1.66268300  | 3.57743900  |
| H | 0.66528900  | 2.17447700  | 3.89829200  |
| H | -0.79149400 | 1.28683500  | 4.44509000  |
| H | -0.87440700 | 2.39112800  | 3.05178600  |
| C | 0.07376800  | 0.50873000  | 2.65628300  |
| N | 0.95110100  | 0.73697500  | 1.64576200  |
| O | -0.43384000 | -0.61380800 | 2.76840600  |

**<sup>5</sup>Co-TS8**

|    |            |             |             |
|----|------------|-------------|-------------|
| Co | 2.05288600 | -0.12791200 | -0.46548400 |
| C  | 3.92091100 | 0.79296400  | 0.26977600  |
| C  | 3.87551300 | -0.61366400 | 0.58891000  |
| C  | 2.77671700 | -0.83202400 | 1.51264900  |
| C  | 2.13606100 | 0.41306800  | 1.72286000  |
| C  | 2.85305600 | 1.42591200  | 0.96019500  |
| C  | 4.95425400 | 1.45869600  | -0.59241300 |
| H  | 4.56770300 | 2.36839100  | -1.05745000 |
| H  | 5.30500100 | 0.79656500  | -1.38833900 |
| H  | 5.82870700 | 1.74046800  | 0.00600500  |

|   |             |             |             |
|---|-------------|-------------|-------------|
| C | 4.91377600  | -1.62516700 | 0.20930400  |
| H | 5.74968100  | -1.58420800 | 0.91845600  |
| H | 5.32386800  | -1.43709300 | -0.78600700 |
| H | 4.52223100  | -2.64509700 | 0.23475300  |
| C | 2.42505200  | -2.14415400 | 2.14889400  |
| H | 3.00669100  | -2.29788300 | 3.06528900  |
| H | 2.64196600  | -2.98823100 | 1.48794900  |
| H | 1.36803800  | -2.18955000 | 2.42258400  |
| C | 0.94516300  | 0.70186300  | 2.58330300  |
| H | 1.25297500  | 1.23702400  | 3.48961400  |
| H | 0.43983700  | -0.21406300 | 2.89677600  |
| H | 0.22866100  | 1.33162900  | 2.04907000  |
| C | 2.51417800  | 2.88146300  | 0.97014500  |
| H | 2.79817400  | 3.32033200  | 1.93483700  |
| H | 1.43968500  | 3.03929100  | 0.84291200  |
| H | 3.04447300  | 3.42893700  | 0.18867300  |
| C | 2.04588200  | -1.89494400 | -1.79011900 |
| H | 2.04466300  | -1.36768600 | -2.74451800 |
| H | 2.92603600  | -2.48905200 | -1.57150000 |
| C | 0.84485300  | -2.15316900 | -1.13370700 |
| H | 0.85753900  | -2.79209800 | -0.25273700 |
| C | -0.37715100 | -1.48312300 | -1.43413000 |
| C | -1.60781400 | -1.72311700 | -0.62646300 |
| H | -1.33823400 | -1.84897000 | 0.42961800  |
| H | -1.99026600 | -2.70668000 | -0.95455200 |
| C | -2.72581900 | -0.68480400 | -0.78108800 |
| H | -2.37889200 | 0.27827300  | -0.39166300 |
| H | -2.94470000 | -0.54225900 | -1.84831000 |
| C | -4.01019700 | -1.08942200 | -0.04899800 |
| H | -3.78437400 | -1.25429300 | 1.01382800  |
| H | -4.36722700 | -2.05210900 | -0.44025900 |
| C | -5.12059700 | -0.04038900 | -0.17624900 |
| H | -4.75706400 | 0.92127300  | 0.21273500  |
| H | -5.34340900 | 0.12468700  | -1.23998100 |
| C | -6.40805900 | -0.43230100 | 0.55742100  |
| H | -6.18445000 | -0.59769400 | 1.62097800  |
| H | -6.76946400 | -1.39517300 | 0.16936900  |
| C | -7.52043700 | 0.61541000  | 0.43017100  |
| H | -7.15646200 | 1.57687700  | 0.81720700  |
| H | -7.74184200 | 0.77908000  | -0.63322900 |
| C | -8.80202600 | 0.21523400  | 1.16715600  |
| H | -8.61452300 | 0.07649500  | 2.23793400  |
| H | -9.57900600 | 0.97841800  | 1.06098900  |
| H | -9.20386600 | -0.72663600 | 0.77691000  |

|   |             |             |             |
|---|-------------|-------------|-------------|
| H | -0.50147900 | -1.09359800 | -2.44240800 |
| C | -0.86846000 | 2.03206300  | -2.51704200 |
| H | -1.66535200 | 1.33449400  | -2.79579900 |
| H | -0.07857200 | 1.96061400  | -3.27101100 |
| H | -1.27603700 | 3.04395900  | -2.49372800 |
| C | -0.34359100 | 1.67712900  | -1.14918200 |
| N | 0.41400100  | 0.52912600  | -1.02385500 |
| O | -0.56553100 | 2.33126900  | -0.13228700 |

**<sup>5</sup>Co-9**

|    |             |             |             |
|----|-------------|-------------|-------------|
| Co | 1.51985700  | 0.06018400  | 0.00300400  |
| C  | 3.61695800  | -0.66382900 | -0.60075200 |
| C  | 2.58937700  | -1.13550200 | -1.51557900 |
| C  | 1.73028000  | -2.05679000 | -0.80472200 |
| C  | 2.27429300  | -2.22287700 | 0.49505000  |
| C  | 3.44552200  | -1.34935700 | 0.62011800  |
| C  | 4.71647400  | 0.29291000  | -0.96162800 |
| H  | 5.52277500  | -0.22791400 | -1.49116200 |
| H  | 5.14796600  | 0.76025400  | -0.07433400 |
| H  | 4.35739400  | 1.08988400  | -1.61851500 |
| C  | 2.48069500  | -0.75696700 | -2.95727200 |
| H  | 3.17052700  | -1.37225600 | -3.55084200 |
| H  | 2.75697500  | 0.28747600  | -3.12639000 |
| H  | 1.47563100  | -0.92184600 | -3.35082900 |
| C  | 0.56724800  | -2.80526600 | -1.39278900 |
| H  | 0.90623700  | -3.72704800 | -1.87941900 |
| H  | 0.04334500  | -2.21180500 | -2.14633400 |
| H  | -0.15840500 | -3.08157000 | -0.62483000 |
| C  | 1.74337300  | -3.04818900 | 1.61368600  |
| H  | 2.51850200  | -3.72287900 | 1.99521000  |
| H  | 0.88336800  | -3.64828400 | 1.31426600  |
| H  | 1.44700000  | -2.39592000 | 2.44450400  |
| C  | 4.21971100  | -1.19441700 | 1.88282300  |
| H  | 4.58580300  | -2.16658400 | 2.23200700  |
| H  | 3.56789000  | -0.79196100 | 2.66770500  |
| H  | 5.07593600  | -0.52945100 | 1.76386300  |
| C  | 1.92633400  | 3.23919600  | -1.17551000 |
| H  | 2.49816700  | 2.63175700  | -0.47693000 |
| H  | 2.49487300  | 3.80500700  | -1.90634300 |
| C  | 0.59686400  | 3.33638600  | -1.10416300 |
| H  | 0.07387200  | 4.00143900  | -1.78955400 |
| C  | -0.30572300 | 2.60086300  | -0.13549000 |
| C  | -1.53917100 | 2.02128400  | -0.86374800 |
| H  | -1.18284700 | 1.29594300  | -1.61011900 |



|   |             |             |             |
|---|-------------|-------------|-------------|
| H | -2.02537200 | 2.82957800  | -1.42320700 |
| C | -2.55336900 | 1.35549700  | 0.06996200  |
| H | -2.05611300 | 0.56393700  | 0.64769200  |
| H | -2.91245000 | 2.09463300  | 0.80036600  |
| C | -3.75095100 | 0.75397300  | -0.67434600 |
| H | -3.38826100 | 0.02361500  | -1.41219900 |
| H | -4.25551400 | 1.54184900  | -1.24980200 |
| C | -4.76143200 | 0.07590300  | 0.25770300  |
| H | -4.25220500 | -0.70855100 | 0.83676900  |
| H | -5.12487800 | 0.80802100  | 0.99245500  |
| C | -5.95574400 | -0.53505300 | -0.48362200 |
| H | -5.59198900 | -1.26612900 | -1.22013900 |
| H | -6.46433500 | 0.24948100  | -1.06141700 |
| C | -6.96677700 | -1.21431400 | 0.44784100  |
| H | -6.45626100 | -1.99684300 | 1.02602500  |
| H | -7.32951800 | -0.48188500 | 1.18157800  |
| C | -8.15513900 | -1.82177100 | -0.30360300 |
| H | -7.82239500 | -2.57994600 | -1.02171800 |
| H | -8.86087000 | -2.29963200 | 0.38278700  |
| H | -8.70167900 | -1.05427700 | -0.86305000 |
| H | -0.66332400 | 3.32105000  | 0.61569000  |
| C | -0.13042400 | 2.04673300  | 2.92633600  |
| H | -1.21971500 | 1.99347200  | 2.83272300  |
| H | 0.15761800  | 3.10071400  | 2.86405800  |
| H | 0.17300000  | 1.64040900  | 3.89070900  |
| C | 0.51218500  | 1.26063400  | 1.82499300  |
| N | 0.42216800  | 1.52959700  | 0.52656900  |
| O | 1.22680400  | 0.21747900  | 2.08123400  |

**[Cp\*RhCl<sub>2</sub>]<sub>2</sub>**

|    |             |             |             |
|----|-------------|-------------|-------------|
| Cl | 0.00002500  | 0.00018200  | -1.72643100 |
| Cl | -0.00002400 | -0.00013100 | 1.72644200  |
| Cl | -1.49722500 | 2.63122000  | 0.00017900  |
| Cl | 1.49716700  | -2.63120400 | -0.00022500 |
| C  | 2.77234700  | 1.56721500  | 0.71230300  |
| C  | 2.77235800  | 1.56735800  | -0.71191600 |
| C  | 3.47360900  | 0.37058900  | -1.16689500 |
| C  | 3.47358900  | 0.37035600  | 1.16705300  |
| C  | 3.94693300  | -0.33256200 | 0.00001300  |
| C  | -3.47357000 | -0.37066000 | 1.16692400  |
| C  | -3.94694000 | 0.33252600  | 0.00005900  |
| C  | -3.47361000 | -0.37033700 | -1.16702300 |
| C  | -2.77230100 | -1.56739500 | 0.71187900  |
| C  | -2.77233500 | -1.56720000 | -0.71233900 |

|    |             |             |             |
|----|-------------|-------------|-------------|
| C  | -2.13687300 | -2.61399500 | -1.57231800 |
| H  | -1.15940200 | -2.89918500 | -1.17346600 |
| H  | -2.77854000 | -3.50321900 | -1.61004300 |
| H  | -1.98381000 | -2.25211400 | -2.58935000 |
| C  | -2.13679900 | -2.61442400 | 1.57154400  |
| H  | -2.77844200 | -3.50367500 | 1.60902900  |
| H  | -1.15932800 | -2.89947300 | 1.17259200  |
| H  | -1.98372200 | -2.25283200 | 2.58867600  |
| C  | -3.72016500 | 0.00125400  | 2.59554700  |
| H  | -4.58955100 | -0.53856800 | 2.99101600  |
| H  | -2.85303200 | -0.24627100 | 3.21189200  |
| H  | -3.90504600 | 1.07229200  | 2.69498000  |
| C  | -4.75631100 | 1.58966100  | 0.00018400  |
| H  | -5.82513200 | 1.34248000  | -0.00063700 |
| H  | -4.53572100 | 2.19747400  | 0.87846600  |
| H  | -4.53454900 | 2.19835400  | -0.87719800 |
| C  | -3.72031600 | 0.00198500  | -2.59552000 |
| H  | -4.58973000 | -0.53773000 | -2.99107400 |
| H  | -3.90522700 | 1.07305000  | -2.69462000 |
| H  | -2.85323400 | -0.24535200 | -3.21201100 |
| C  | 2.13688200  | 2.61405600  | 1.57222500  |
| H  | 2.77856200  | 3.50327200  | 1.60992900  |
| H  | 1.15942500  | 2.89924500  | 1.17334000  |
| H  | 1.98379000  | 2.25221900  | 2.58926700  |
| C  | 3.72023100  | -0.00191100 | 2.59557500  |
| H  | 4.58963400  | 0.53781100  | 2.99114400  |
| H  | 2.85312400  | 0.24546300  | 3.21201700  |
| H  | 3.90512100  | -1.07297400 | 2.69473100  |
| C  | 2.13690100  | 2.61436800  | -1.57163700 |
| H  | 1.15942700  | 2.89945600  | -1.17271900 |
| H  | 2.77856600  | 3.50360300  | -1.60913800 |
| H  | 1.98384200  | 2.25274100  | -2.58875900 |
| C  | 3.72025400  | -0.00139000 | -2.59549200 |
| H  | 2.85316100  | 0.24614200  | -3.21188900 |
| H  | 4.58968000  | 0.53838300  | -2.99094100 |
| H  | 3.90510300  | -1.07243900 | -2.69487000 |
| C  | 4.75627700  | -1.58971500 | -0.00008300 |
| H  | 4.53485600  | -2.19817000 | 0.87754900  |
| H  | 4.53531900  | -2.19775700 | -0.87811600 |
| H  | 5.82510300  | -1.34255700 | 0.00025100  |
| Rh | -1.77686200 | 0.24601100  | -0.00000400 |
| Rh | 1.77685700  | -0.24599900 | 0.00000500  |

**Rh-1**

|    |             |             |             |
|----|-------------|-------------|-------------|
| C  | 1.60483000  | 0.73384300  | -0.79330100 |
| C  | 1.60473500  | -0.73425700 | -0.79298500 |
| C  | 1.34820300  | -1.18208500 | 0.53420500  |
| C  | 1.14591200  | 0.00025600  | 1.36010800  |
| C  | 1.34833200  | 1.18222100  | 0.53369900  |
| C  | 1.85480300  | 1.58538700  | -1.99438600 |
| H  | 2.93588600  | 1.66652400  | -2.16368800 |
| H  | 1.45602200  | 2.59268000  | -1.86699700 |
| H  | 1.41321700  | 1.15005000  | -2.89388900 |
| C  | 1.85458200  | -1.58640200 | -1.99368300 |
| H  | 2.93563500  | -1.66742400 | -2.16322200 |
| H  | 1.41267900  | -1.15165500 | -2.89331800 |
| H  | 1.45602600  | -2.59369700 | -1.86562900 |
| C  | 1.27608600  | -2.59604100 | 1.01533300  |
| H  | 2.23065400  | -2.87717800 | 1.47568200  |
| H  | 1.07649000  | -3.28986100 | 0.19769200  |
| H  | 0.49167700  | -2.72207000 | 1.76480500  |
| C  | 0.86935800  | 0.00066000  | 2.82454700  |
| H  | 1.82478900  | 0.00077100  | 3.36619100  |
| H  | 0.31306300  | -0.88717800 | 3.13038700  |
| H  | 0.31313400  | 0.88871700  | 3.12988100  |
| C  | 1.27642800  | 2.59637700  | 1.01428200  |
| H  | 2.23059200  | 2.87710300  | 1.47571600  |
| H  | 0.49117700  | 2.72309200  | 1.76276600  |
| H  | 1.07823200  | 3.29004700  | 0.19618100  |
| O  | -2.14239700 | 1.09351100  | -0.15804500 |
| O  | -2.14247900 | -1.09346500 | -0.15765000 |
| C  | -2.81946700 | 0.00003600  | -0.19493600 |
| C  | -4.30695900 | 0.00008700  | -0.24776300 |
| H  | -4.66734600 | -0.90129000 | -0.74605400 |
| H  | -4.68744600 | -0.00013300 | 0.78065000  |
| H  | -4.66731000 | 0.90166400  | -0.74570900 |
| Rh | -0.34887200 | -0.00002300 | -0.15570200 |

## Rh-2

|   |             |             |             |
|---|-------------|-------------|-------------|
| C | 1.54305200  | -1.98352200 | 0.21565800  |
| C | 1.34078300  | -1.28998300 | 1.46041300  |
| C | 2.53110100  | -0.54155800 | 1.75942400  |
| C | 3.50273000  | -0.81760400 | 0.70925100  |
| C | 2.89272000  | -1.69695300 | -0.24185200 |
| C | 0.60168700  | -2.97796100 | -0.38867900 |
| H | 0.72339600  | -3.94455100 | 0.11489800  |
| H | 0.80090800  | -3.13679600 | -1.44987300 |
| H | -0.43868700 | -2.66953400 | -0.27694100 |

|   |             |             |             |
|---|-------------|-------------|-------------|
| C | 0.09108000  | -1.31135000 | 2.27869900  |
| H | 0.17355900  | -2.08237300 | 3.05434400  |
| H | -0.78405400 | -1.53982000 | 1.66811900  |
| H | -0.07752000 | -0.35234100 | 2.77236500  |
| C | 2.78221800  | 0.30011700  | 2.97085000  |
| H | 3.30315800  | -0.28716200 | 3.73605700  |
| H | 1.84873800  | 0.66341700  | 3.40454400  |
| H | 3.40521000  | 1.16308600  | 2.72617600  |
| C | 4.88512100  | -0.25183000 | 0.66542300  |
| H | 5.51197500  | -0.75713700 | 1.40971800  |
| H | 4.87687200  | 0.81520800  | 0.90280200  |
| H | 5.34858000  | -0.38262600 | -0.31315500 |
| C | 3.54096000  | -2.29320000 | -1.45207300 |
| H | 3.91777500  | -3.29465900 | -1.21427300 |
| H | 4.38401900  | -1.69228200 | -1.79705300 |
| H | 2.83434800  | -2.39728400 | -2.27899200 |
| O | 0.31544600  | 1.69905700  | 0.33061400  |
| O | 2.40920000  | 2.23545500  | 0.08596200  |
| C | 1.21334700  | 2.61007400  | 0.33774900  |
| C | 0.87188700  | 4.04468000  | 0.58462100  |
| H | 1.74159300  | 4.58173000  | 0.96602700  |
| H | 0.56951200  | 4.50366600  | -0.36332000 |
| H | 0.03327200  | 4.11809100  | 1.27947900  |
| C | 1.86914900  | 0.71139300  | -2.36486000 |
| H | 1.85338400  | 1.79710600  | -2.39281100 |
| H | 2.79494300  | 0.24045900  | -2.68133600 |
| C | 0.69605200  | -0.00695100 | -2.28808100 |
| H | 0.74242400  | -1.07974900 | -2.46968600 |
| C | -0.68770300 | 0.57803300  | -2.27194000 |
| H | -0.64817200 | 1.63149000  | -1.98077200 |
| H | -1.04322700 | 0.54796400  | -3.31355600 |
| C | -1.68285700 | -0.18262000 | -1.38434000 |
| H | -1.30730700 | -0.18280400 | -0.35431400 |
| H | -1.73330100 | -1.23071300 | -1.71175200 |
| C | -3.08854900 | 0.42444400  | -1.40256600 |
| H | -3.02887500 | 1.47648300  | -1.09196700 |
| H | -3.47462200 | 0.42697500  | -2.43106400 |
| C | -4.06759800 | -0.32079900 | -0.48862400 |
| H | -3.67277900 | -0.32186600 | 0.53843800  |
| H | -4.12299300 | -1.37491700 | -0.79664500 |
| C | -5.47717300 | 0.28120200  | -0.48650200 |
| H | -5.42000900 | 1.33589700  | -0.18241000 |
| H | -5.87207100 | 0.28144900  | -1.51201700 |
| C | -6.45239500 | -0.46123000 | 0.43376900  |

|    |             |             |             |
|----|-------------|-------------|-------------|
| H  | -6.05577300 | -0.46249400 | 1.45957500  |
| H  | -6.50899900 | -1.51619600 | 0.12911100  |
| C  | -7.86272000 | 0.14051900  | 0.43783700  |
| H  | -7.80423800 | 1.19464100  | 0.74126700  |
| H  | -8.25740100 | 0.14065800  | -0.58713300 |
| C  | -8.82843700 | -0.60827200 | 1.36118500  |
| H  | -8.47295400 | -0.59572500 | 2.39794900  |
| H  | -9.82640000 | -0.15941400 | 1.34587000  |
| H  | -8.92979700 | -1.65692900 | 1.05919200  |
| Rh | 1.76736900  | 0.19207100  | -0.14470400 |

**Rh-TS<sub>iso</sub>**

|   |             |             |             |
|---|-------------|-------------|-------------|
| C | 2.77076600  | -1.85458500 | 0.29034600  |
| C | 1.59377300  | -1.74538200 | 1.09175400  |
| C | 1.69635700  | -0.51942200 | 1.87925700  |
| C | 2.90856600  | 0.14158700  | 1.53277400  |
| C | 3.57342500  | -0.65497500 | 0.51215900  |
| C | 3.14851600  | -3.00197100 | -0.59061900 |
| H | 3.73617800  | -3.72431500 | -0.01165700 |
| H | 3.76165900  | -2.67906300 | -1.43387200 |
| H | 2.27175500  | -3.52384300 | -0.97869500 |
| C | 0.49011000  | -2.75081900 | 1.20373700  |
| H | 0.65095400  | -3.38801400 | 2.08118800  |
| H | 0.44416200  | -3.39852500 | 0.32646200  |
| H | -0.48156400 | -2.26552700 | 1.32046700  |
| C | 0.68912000  | -0.02053500 | 2.86087300  |
| H | 0.49783900  | 1.04280600  | 2.70217200  |
| H | 1.07494100  | -0.15873200 | 3.87830000  |
| H | -0.25614200 | -0.55881000 | 2.78167900  |
| C | 3.40841100  | 1.42915900  | 2.10299500  |
| H | 2.57886600  | 2.05893000  | 2.42683500  |
| H | 3.99334800  | 1.98306900  | 1.36635700  |
| H | 4.05275800  | 1.22823000  | 2.96688700  |
| C | 4.90870200  | -0.35617600 | -0.08530900 |
| H | 5.70007200  | -0.67887200 | 0.60276100  |
| H | 5.02778400  | 0.71506700  | -0.25987600 |
| H | 5.05272600  | -0.87672200 | -1.03333300 |
| O | 0.52621200  | 2.28330600  | 0.59521800  |
| O | 2.09222000  | 1.89759400  | -0.95022300 |
| C | 1.34810600  | 2.70484700  | -0.23276200 |
| C | 1.57987100  | 4.17611700  | -0.48483800 |
| H | 0.81074900  | 4.76540600  | 0.01435300  |
| H | 2.56452300  | 4.45895100  | -0.09844500 |
| H | 1.58149800  | 4.38143100  | -1.55820200 |

|    |              |             |             |
|----|--------------|-------------|-------------|
| C  | 1.66811700   | -0.40302400 | -2.59959300 |
| H  | 1.76844700   | 0.62022000  | -2.94688900 |
| H  | 2.42518300   | -1.10958700 | -2.92632000 |
| C  | 0.50398100   | -0.85813000 | -2.01524100 |
| H  | 0.36323500   | -1.93063700 | -1.88462400 |
| C  | -0.64777400  | 0.03031200  | -1.61610900 |
| H  | -0.40769800  | 0.56665000  | -0.65981500 |
| H  | -0.75450700  | 0.85155900  | -2.33487300 |
| C  | -1.96701300  | -0.71960300 | -1.39369300 |
| H  | -1.79717300  | -1.54055800 | -0.68274900 |
| H  | -2.27323700  | -1.18824100 | -2.33782700 |
| C  | -3.08296200  | 0.19034500  | -0.87157400 |
| H  | -2.75645400  | 0.66159500  | 0.06668900  |
| H  | -3.24427300  | 1.01085800  | -1.58375700 |
| C  | -4.40306500  | -0.55327900 | -0.64042300 |
| H  | -4.23701100  | -1.37744800 | 0.06861200  |
| H  | -4.72610400  | -1.02132800 | -1.58064700 |
| C  | -5.52095500  | 0.35319600  | -0.11266000 |
| H  | -5.19487800  | 0.82320700  | 0.82616600  |
| H  | -5.68566300  | 1.17565100  | -0.82270300 |
| C  | -6.84171800  | -0.38844900 | 0.12148100  |
| H  | -6.67629600  | -1.21246500 | 0.83057600  |
| H  | -7.16676900  | -0.85773300 | -0.81797200 |
| C  | -7.96119800  | 0.51674000  | 0.64929100  |
| H  | -7.63438700  | 0.98536300  | 1.58762400  |
| H  | -8.12468600  | 1.33897900  | -0.06038800 |
| C  | -9.27636800  | -0.23383000 | 0.87921800  |
| H  | -9.14763800  | -1.04143000 | 1.60892100  |
| H  | -10.05787300 | 0.43364500  | 1.25522700  |
| H  | -9.64124800  | -0.68406500 | -0.05089700 |
| Rh | 1.72086400   | -0.04945900 | -0.32653500 |

**Rh-2'**

|   |            |             |             |
|---|------------|-------------|-------------|
| C | 2.67142000 | -1.85342800 | 0.42362700  |
| C | 1.36650000 | -1.81459300 | 1.00543300  |
| C | 1.26696800 | -0.60092800 | 1.80994200  |
| C | 2.49685500 | 0.11084800  | 1.70316200  |
| C | 3.36789100 | -0.63068600 | 0.80387600  |
| C | 3.24598400 | -2.95864500 | -0.40390800 |
| H | 3.76949100 | -3.66669100 | 0.24947900  |
| H | 3.96930100 | -2.58322400 | -1.13017000 |
| H | 2.47171300 | -3.51166600 | -0.93917100 |
| C | 0.31435400 | -2.87492900 | 0.90588800  |
| H | 0.39382500 | -3.56016100 | 1.75798500  |

|   |             |             |             |
|---|-------------|-------------|-------------|
| H | 0.42119500  | -3.46573500 | -0.00589900 |
| H | -0.68969900 | -2.44588500 | 0.92002400  |
| C | 0.07933700  | -0.15558100 | 2.59904400  |
| H | -0.12676300 | 0.89932000  | 2.40324400  |
| H | 0.28165500  | -0.27969800 | 3.66952000  |
| H | -0.81142200 | -0.73577100 | 2.35402100  |
| C | 2.83428200  | 1.39406300  | 2.38928300  |
| H | 1.94179700  | 2.00208900  | 2.54024800  |
| H | 3.55341300  | 1.97400900  | 1.80834000  |
| H | 3.28316400  | 1.17884300  | 3.36635400  |
| C | 4.77774900  | -0.26727900 | 0.46705500  |
| H | 5.44544800  | -0.57719500 | 1.28027400  |
| H | 4.88171600  | 0.81153600  | 0.33517200  |
| H | 5.11153400  | -0.75691300 | -0.44920600 |
| O | 0.30046100  | 2.39492600  | 0.53777900  |
| O | 2.03933900  | 1.91203000  | -0.80558100 |
| C | 1.23515000  | 2.75212000  | -0.18536600 |
| C | 1.57321700  | 4.20789300  | -0.42908800 |
| H | 1.76331900  | 4.38665600  | -1.48992200 |
| H | 0.76025100  | 4.84094500  | -0.07359300 |
| H | 2.49070000  | 4.45864400  | 0.11364200  |
| C | 2.03170800  | -0.28561000 | -2.61316800 |
| H | 2.17980500  | 0.76478300  | -2.84030800 |
| H | 2.82495000  | -0.97043600 | -2.89759400 |
| C | 0.79870400  | -0.78494500 | -2.24018100 |
| H | 0.63500500  | -1.86172900 | -2.23728900 |
| C | -0.35346900 | 0.08136300  | -1.81990500 |
| H | -0.16148100 | 0.53756900  | -0.77888300 |
| H | -0.40215900 | 0.99480500  | -2.42363300 |
| C | -1.70200200 | -0.63475000 | -1.69865100 |
| H | -1.55798400 | -1.57695300 | -1.15291500 |
| H | -2.04137100 | -0.91024000 | -2.70514400 |
| C | -2.76398000 | 0.21408300  | -0.99240200 |
| H | -2.39240200 | 0.50453200  | 0.00108800  |
| H | -2.90745200 | 1.15174000  | -1.54556400 |
| C | -4.10699600 | -0.50915000 | -0.84646200 |
| H | -3.95473100 | -1.45174900 | -0.30012900 |
| H | -4.47917900 | -0.79137100 | -1.84089200 |
| C | -5.16672300 | 0.33051100  | -0.12415200 |
| H | -4.78803200 | 0.61867300  | 0.86708400  |
| H | -5.32139600 | 1.26910500  | -0.67416900 |
| C | -6.50810000 | -0.39382900 | 0.03466000  |
| H | -6.35198200 | -1.33385300 | 0.58352700  |
| H | -6.88602300 | -0.68101500 | -0.95678800 |

|    |             |             |             |
|----|-------------|-------------|-------------|
| C  | -7.56875100 | 0.44469400  | 0.75793500  |
| H  | -7.18805800 | 0.73306800  | 1.74732300  |
| H  | -7.72444900 | 1.38203100  | 0.20703500  |
| C  | -8.90418000 | -0.28893100 | 0.91372200  |
| H  | -8.78178900 | -1.21396600 | 1.48868300  |
| H  | -9.64284900 | 0.33029200  | 1.43188000  |
| H  | -9.32171100 | -0.55953900 | -0.06264800 |
| Rh | 1.66041700  | -0.07231700 | -0.33868100 |

**Rh-TS3**

|   |             |             |             |
|---|-------------|-------------|-------------|
| C | 2.90877000  | -1.62098300 | 0.50984300  |
| C | 1.51876800  | -2.02456100 | 0.58418900  |
| C | 0.82897400  | -1.10391500 | 1.46105200  |
| C | 1.75582400  | -0.09225900 | 1.85324100  |
| C | 3.05618000  | -0.41296800 | 1.26574200  |
| C | 3.99310800  | -2.36609900 | -0.20335000 |
| H | 4.40343900  | -3.13843800 | 0.45800900  |
| H | 4.81090700  | -1.70589200 | -0.49639500 |
| H | 3.61727600  | -2.86596500 | -1.09884000 |
| C | 0.94459300  | -3.28630000 | 0.01697800  |
| H | 1.06898400  | -4.10627400 | 0.73416500  |
| H | 1.44641600  | -3.58034900 | -0.90735200 |
| H | -0.12322100 | -3.18777900 | -0.18785300 |
| C | -0.60467500 | -1.20073800 | 1.87555100  |
| H | -1.00882000 | -0.22587400 | 2.15237400  |
| H | -0.69079600 | -1.86204400 | 2.74628800  |
| H | -1.22864300 | -1.61682500 | 1.08207900  |
| C | 1.48478200  | 1.06640400  | 2.76046200  |
| H | 0.45462400  | 1.41441200  | 2.66525000  |
| H | 2.15036700  | 1.90137600  | 2.53360500  |
| H | 1.65509100  | 0.77523600  | 3.80343300  |
| C | 4.30767700  | 0.37559700  | 1.48845300  |
| H | 4.65758900  | 0.23947700  | 2.51820000  |
| H | 4.12484000  | 1.44121500  | 1.32819100  |
| H | 5.10633600  | 0.06349300  | 0.81418200  |
| O | -0.13401200 | 2.30986400  | -0.11633000 |
| O | 2.07165100  | 2.05144700  | -0.38282300 |
| C | 1.03350900  | 2.78144500  | -0.15001100 |
| C | 1.26125200  | 4.25082400  | 0.09617200  |
| H | 2.29401300  | 4.53055600  | -0.10944800 |
| H | 0.57442400  | 4.83294400  | -0.52255500 |
| H | 1.02245200  | 4.46983800  | 1.14190300  |
| C | 2.36321300  | 0.00553400  | -2.47769700 |
| H | 2.49570100  | 1.07221900  | -2.62907800 |



|    |             |             |             |
|----|-------------|-------------|-------------|
| H  | 3.21030600  | -0.62742800 | -2.72365600 |
| C  | 1.09026000  | -0.56009200 | -2.35511300 |
| H  | 0.95363100  | -1.63259300 | -2.48100700 |
| C  | -0.05623600 | 0.24013900  | -1.91493000 |
| H  | 0.06253700  | 0.98880900  | -0.74858500 |
| H  | -0.10729800 | 1.20850000  | -2.42545100 |
| C  | -1.40061300 | -0.46922800 | -1.79793400 |
| H  | -1.24384300 | -1.45045100 | -1.33124200 |
| H  | -1.76366400 | -0.67140300 | -2.81507200 |
| C  | -2.46788300 | 0.30848200  | -1.01969900 |
| H  | -2.09666100 | 0.53668600  | -0.01349000 |
| H  | -2.63407400 | 1.28019300  | -1.50156100 |
| C  | -3.79151400 | -0.45562500 | -0.91618400 |
| H  | -3.61205400 | -1.43284800 | -0.44240000 |
| H  | -4.16897300 | -0.67423900 | -1.92455100 |
| C  | -4.86181300 | 0.30186200  | -0.12272900 |
| H  | -4.47977000 | 0.51986500  | 0.88527400  |
| H  | -5.04027400 | 1.27711100  | -0.59632300 |
| C  | -6.18673700 | -0.46039800 | -0.01098000 |
| H  | -6.00692700 | -1.43717300 | 0.46119500  |
| H  | -6.56717900 | -0.67686200 | -1.01923100 |
| C  | -7.25804000 | 0.29660900  | 0.78296600  |
| H  | -6.87588800 | 0.51279500  | 1.79011200  |
| H  | -7.43571500 | 1.27155400  | 0.30941300  |
| C  | -8.57796600 | -0.47332100 | 0.88706300  |
| H  | -8.43376600 | -1.43888800 | 1.38516700  |
| H  | -9.32465100 | 0.08773200  | 1.45732500  |
| H  | -8.99715500 | -0.67293800 | -0.10552800 |
| Rh | 1.64846100  | -0.02028200 | -0.35270700 |

**Rh-4**

|   |             |             |             |
|---|-------------|-------------|-------------|
| C | -3.06863300 | -1.04083600 | 0.60575000  |
| C | -1.97587600 | -0.56894000 | 1.44964500  |
| C | -0.71089700 | -1.10046600 | 0.92735000  |
| C | -1.00514900 | -1.72581500 | -0.29755600 |
| C | -2.47034400 | -1.68217000 | -0.50101000 |
| C | -4.53012200 | -0.87504200 | 0.89099600  |
| H | -4.88216800 | -1.69214600 | 1.53171600  |
| H | -5.12367600 | -0.88835000 | -0.02496100 |
| H | -4.73389600 | 0.06347500  | 1.41115800  |
| C | -2.12559600 | 0.12461900  | 2.76376400  |
| H | -2.22858100 | -0.62322900 | 3.56077100  |
| H | -3.01364900 | 0.75918400  | 2.78824700  |
| H | -1.24959100 | 0.73460900  | 2.99562400  |

|    |             |             |             |
|----|-------------|-------------|-------------|
| C  | 0.60490800  | -1.00342100 | 1.63362800  |
| H  | 0.59130800  | -1.63786700 | 2.52766000  |
| H  | 0.81506600  | 0.01824300  | 1.96116500  |
| H  | 1.43180200  | -1.33012500 | 1.00260700  |
| C  | -0.04993200 | -2.41010300 | -1.22544500 |
| H  | -0.11932000 | -3.49763200 | -1.10147300 |
| H  | 0.98247700  | -2.11254500 | -1.03536100 |
| H  | -0.27950300 | -2.18826200 | -2.27122900 |
| C  | -3.16745100 | -2.30160300 | -1.67045700 |
| H  | -3.20489300 | -3.39102400 | -1.54609500 |
| H  | -2.63583400 | -2.10278500 | -2.60526900 |
| H  | -4.19142800 | -1.93872000 | -1.77216700 |
| C  | -2.83087300 | 2.24748100  | -0.67551600 |
| H  | -2.91796000 | 2.26715500  | -1.76494200 |
| H  | -3.76112300 | 2.41550200  | -0.14180800 |
| C  | -1.59229100 | 2.59513700  | -0.07444700 |
| H  | -1.56358200 | 2.93274100  | 0.96076300  |
| C  | -0.39996400 | 2.16186200  | -0.69340500 |
| C  | 0.97236400  | 2.29068400  | -0.08953900 |
| H  | 0.90276000  | 2.16206400  | 0.99889200  |
| H  | 1.33994200  | 3.31422100  | -0.25024600 |
| C  | 1.97397000  | 1.28996000  | -0.68269800 |
| H  | 1.52090700  | 0.29075400  | -0.67517700 |
| H  | 2.14689200  | 1.53544600  | -1.73920000 |
| C  | 3.31070400  | 1.24746300  | 0.06298200  |
| H  | 3.12511000  | 1.04649400  | 1.12820300  |
| H  | 3.78817100  | 2.23529500  | 0.01968200  |
| C  | 4.26881900  | 0.18689900  | -0.49046100 |
| H  | 3.77971400  | -0.79900200 | -0.44976500 |
| H  | 4.45773600  | 0.38606300  | -1.55443200 |
| C  | 5.60249100  | 0.11911500  | 0.26138500  |
| H  | 5.41045000  | -0.07480800 | 1.32658600  |
| H  | 6.09393800  | 1.10090700  | 0.21595300  |
| C  | 6.55464700  | -0.95113600 | -0.28553700 |
| H  | 6.05954400  | -1.93127400 | -0.24240700 |
| H  | 6.74641900  | -0.75364500 | -1.34879800 |
| C  | 7.88271900  | -1.01165400 | 0.47492400  |
| H  | 7.72099200  | -1.23908000 | 1.53474300  |
| H  | 8.54308400  | -1.78212100 | 0.06548600  |
| H  | 8.41257200  | -0.05421800 | 0.41938200  |
| H  | -0.42155000 | 2.07032600  | -1.78935400 |
| Rh | -1.71118000 | 0.42560300  | -0.40982400 |

**Rh-5**

|   |              |              |              |
|---|--------------|--------------|--------------|
| C | 1. 27954500  | -2. 51611400 | 0. 39546400  |
| C | 0. 16174300  | -1. 84536800 | 1. 03987500  |
| C | 0. 68917600  | -0. 77227500 | 1. 79477600  |
| C | 2. 15747600  | -0. 83309900 | 1. 71263700  |
| C | 2. 51318000  | -1. 94087900 | 0. 89922000  |
| C | 1. 17247600  | -3. 76785900 | -0. 42198900 |
| H | 1. 17370800  | -4. 64590000 | 0. 23480300  |
| H | 2. 01150000  | -3. 87301400 | -1. 11368300 |
| H | 0. 24546900  | -3. 79028500 | -0. 99959300 |
| C | -1. 26578600 | -2. 28740700 | 0. 96044900  |
| H | -1. 55623300 | -2. 55283400 | -0. 05806300 |
| H | -1. 95358900 | -1. 52053800 | 1. 31792000  |
| H | -1. 40533700 | -3. 17977000 | 1. 58245900  |
| C | -0. 08140900 | 0. 19742400  | 2. 63884900  |
| H | -0. 13989600 | -0. 16124200 | 3. 67327400  |
| H | -1. 09914100 | 0. 33184900  | 2. 26780500  |
| H | 0. 39718700  | 1. 17918000  | 2. 65906100  |
| C | 3. 08593600  | 0. 04970200  | 2. 48999400  |
| H | 3. 15366000  | -0. 29486300 | 3. 52846400  |
| H | 2. 72788600  | 1. 08235900  | 2. 51749200  |
| H | 4. 09467900  | 0. 04487700  | 2. 07224600  |
| C | 3. 89187800  | -2. 45771900 | 0. 62084300  |
| H | 4. 13571200  | -3. 27052600 | 1. 31506200  |
| H | 4. 64901400  | -1. 68001300 | 0. 74051600  |
| H | 3. 97426900  | -2. 85729100 | -0. 39267000 |
| C | 2. 51094600  | -0. 40321400 | -2. 19183500 |
| H | 2. 72715300  | 0. 63779500  | -2. 41804400 |
| H | 3. 36128600  | -1. 07474500 | -2. 27230200 |
| C | 1. 20555700  | -0. 91096600 | -2. 44792900 |
| H | 1. 06321500  | -1. 97526500 | -2. 62452000 |
| C | 0. 08246500  | -0. 10001300 | -2. 18618600 |
| C | -1. 33805200 | -0. 58629700 | -2. 25002900 |
| H | -1. 37448600 | -1. 66395100 | -2. 04672300 |
| H | -1. 70360600 | -0. 46005600 | -3. 28012700 |
| C | -2. 26681300 | 0. 17329800  | -1. 29097000 |
| H | -1. 82913600 | 0. 15210600  | -0. 28576700 |
| H | -2. 29541100 | 1. 23213300  | -1. 57997700 |
| C | -3. 68985200 | -0. 38951200 | -1. 24645000 |
| H | -3. 64999200 | -1. 46357700 | -1. 01351300 |
| H | -4. 14795900 | -0. 31285100 | -2. 24160400 |
| C | -4. 57697600 | 0. 31613600  | -0. 21492600 |
| H | -4. 10832600 | 0. 23773400  | 0. 77829700  |
| H | -4. 61888200 | 1. 38994600  | -0. 44419600 |
| C | -6. 00012000 | -0. 24825000 | -0. 14727000 |

|    |             |             |             |
|----|-------------|-------------|-------------|
| H  | -5.95478600 | -1.32412400 | 0.07571900  |
| H  | -6.47087100 | -0.16368200 | -1.13668400 |
| C  | -6.88180700 | 0.44895400  | 0.89558400  |
| H  | -6.40760500 | 0.36544400  | 1.88337700  |
| H  | -6.92678000 | 1.52285600  | 0.66972600  |
| C  | -8.30066600 | -0.12468000 | 0.95586700  |
| H  | -8.28521200 | -1.19044300 | 1.21101600  |
| H  | -8.90858200 | 0.38924800  | 1.70675000  |
| H  | -8.80785400 | -0.02360600 | -0.01014300 |
| H  | 0.20266400  | 0.97616500  | -2.29820000 |
| C  | 3.87874700  | 2.32865000  | -0.20774500 |
| H  | 4.28700200  | 2.89484500  | -1.05063700 |
| H  | 4.08009700  | 1.26590400  | -0.33887700 |
| H  | 4.35997600  | 2.69206300  | 0.70498000  |
| C  | 2.41914400  | 2.55353400  | -0.11939700 |
| O  | 1.94806000  | 3.80002500  | 0.07333800  |
| N  | 1.48049900  | 1.66707500  | -0.20430800 |
| O  | 0.25837900  | 2.38248100  | -0.05368400 |
| C  | 0.55437000  | 3.70939000  | 0.12070300  |
| O  | -0.20573800 | 4.60067000  | 0.28262100  |
| Rh | 1.36495900  | -0.45358800 | -0.33597500 |

**Rh-TS6**

|   |             |             |             |
|---|-------------|-------------|-------------|
| C | 1.86892100  | -2.36594500 | 0.64713500  |
| C | 0.50202600  | -2.02232300 | 0.97923600  |
| C | 0.51763800  | -0.79254000 | 1.70406300  |
| C | 1.90296400  | -0.37237800 | 1.83092800  |
| C | 2.74118700  | -1.36841400 | 1.21977200  |
| C | 2.31939000  | -3.63275200 | -0.01494700 |
| H | 2.53343800  | -4.39338600 | 0.74481400  |
| H | 3.23318900  | -3.48254600 | -0.59453000 |
| H | 1.55457000  | -4.04046200 | -0.67887400 |
| C | -0.70335300 | -2.86014600 | 0.68460400  |
| H | -0.56954600 | -3.45989200 | -0.21772200 |
| H | -1.60103800 | -2.25311900 | 0.56084900  |
| H | -0.87813000 | -3.55429800 | 1.51524600  |
| C | -0.64656200 | -0.05638800 | 2.29149900  |
| H | -0.68773000 | 0.97045500  | 1.91843100  |
| H | -0.55021200 | -0.01849100 | 3.38268500  |
| H | -1.59404400 | -0.54063500 | 2.05300000  |
| C | 2.35046900  | 0.83123400  | 2.59937600  |
| H | 2.36365800  | 0.59936200  | 3.67068500  |
| H | 1.66923600  | 1.67223900  | 2.45119300  |
| H | 3.35651100  | 1.14349300  | 2.31456700  |

|    |             |             |             |
|----|-------------|-------------|-------------|
| C  | 4.23774200  | -1.40975400 | 1.24293600  |
| H  | 4.58169100  | -1.96237400 | 2.12552800  |
| H  | 4.66734900  | -0.40726100 | 1.29132600  |
| H  | 4.64106000  | -1.91190600 | 0.36115700  |
| C  | 2.54343200  | -0.65469000 | -2.24205900 |
| H  | 2.75840400  | 0.35049700  | -2.58801400 |
| H  | 3.38966000  | -1.33456800 | -2.21407700 |
| C  | 1.23483700  | -1.18887300 | -2.38374900 |
| H  | 1.09659500  | -2.26871100 | -2.37942200 |
| C  | 0.10206400  | -0.36427900 | -2.28180900 |
| C  | -1.30089100 | -0.88007200 | -2.24316000 |
| H  | -1.30850200 | -1.94728800 | -1.99296700 |
| H  | -1.70194800 | -0.79834600 | -3.26571100 |
| C  | -2.21592400 | -0.09144100 | -1.29031600 |
| H  | -1.76353500 | -0.08131200 | -0.29292800 |
| H  | -2.24522100 | 0.95886800  | -1.60033300 |
| C  | -3.63373400 | -0.66321600 | -1.21388400 |
| H  | -3.58901300 | -1.72737000 | -0.93659300 |
| H  | -4.09803100 | -0.63114900 | -2.20867000 |
| C  | -4.51679800 | 0.08609500  | -0.20939600 |
| H  | -4.04775900 | 0.04669600  | 0.78562200  |
| H  | -4.55353000 | 1.14947000  | -0.48242500 |
| C  | -5.94253000 | -0.46850200 | -0.11966000 |
| H  | -5.90390100 | -1.53407000 | 0.14948300  |
| H  | -6.41148300 | -0.42357500 | -1.11252400 |
| C  | -6.82121300 | 0.27894800  | 0.89053100  |
| H  | -6.35030900 | 0.23337000  | 1.88232300  |
| H  | -6.85657300 | 1.34259000  | 0.61941400  |
| C  | -8.24489400 | -0.28005800 | 0.97016600  |
| H  | -8.23941000 | -1.33429700 | 1.26973100  |
| H  | -8.85027200 | 0.27010700  | 1.69695200  |
| H  | -8.74854100 | -0.21492100 | -0.00076500 |
| H  | 0.21683800  | 0.70018000  | -2.47162900 |
| C  | 3.67229800  | 2.63477300  | -0.35615400 |
| H  | 3.96711200  | 3.34918700  | -1.12890500 |
| H  | 4.08307600  | 1.64989000  | -0.57762000 |
| H  | 4.04584600  | 2.99575200  | 0.60560200  |
| C  | 2.15019000  | 2.62831900  | -0.28409800 |
| O  | 1.57272100  | 3.72694200  | -0.01304700 |
| N  | 1.57388400  | 1.48971900  | -0.55927400 |
| O  | -0.36870400 | 2.35754800  | -0.28689500 |
| C  | -0.19620900 | 3.54420000  | -0.00157600 |
| O  | -0.69639500 | 4.57627100  | 0.27493900  |
| Rh | 1.46191100  | -0.40037900 | -0.33459100 |

**Rh-7**

|   |             |             |             |
|---|-------------|-------------|-------------|
| C | -2.87173900 | -0.44378100 | -1.34828200 |
| C | -2.12742600 | -1.65957600 | -1.16416900 |
| C | -0.73334700 | -1.36148400 | -1.35490500 |
| C | -0.60474900 | 0.03558400  | -1.68273400 |
| C | -1.92574200 | 0.60991200  | -1.66766900 |
| C | -4.36226300 | -0.30642200 | -1.34863300 |
| H | -4.74859200 | -0.46518800 | -2.36288200 |
| H | -4.67277400 | 0.68952200  | -1.02667100 |
| H | -4.83641300 | -1.04137100 | -0.69512600 |
| C | -2.71699900 | -3.01492400 | -0.91475600 |
| H | -2.99070000 | -3.48419000 | -1.86673300 |
| H | -3.62336700 | -2.95710300 | -0.30749200 |
| H | -2.01167700 | -3.68256800 | -0.41529600 |
| C | 0.38964200  | -2.35081100 | -1.32696300 |
| H | 0.55555900  | -2.74614900 | -2.33628200 |
| H | 0.16962400  | -3.19949000 | -0.67615400 |
| H | 1.32227500  | -1.89304800 | -0.99304300 |
| C | 0.64334800  | 0.76785500  | -2.06371100 |
| H | 0.60275900  | 1.02713200  | -3.12852000 |
| H | 1.53551200  | 0.16165300  | -1.90177000 |
| H | 0.73716900  | 1.69251500  | -1.48828100 |
| C | -2.26350000 | 1.99922400  | -2.10625100 |
| H | -2.40029800 | 2.00830600  | -3.19433100 |
| H | -1.46031500 | 2.69723000  | -1.86281900 |
| H | -3.19047900 | 2.35523100  | -1.65222400 |
| C | -2.61123700 | -0.98749100 | 2.12854300  |
| H | -2.78754100 | -0.13461500 | 2.77409600  |
| H | -3.48220700 | -1.58015500 | 1.86762000  |
| C | -1.32622800 | -1.57906100 | 2.05687800  |
| H | -1.22744100 | -2.58636300 | 1.65587100  |
| C | -0.15927800 | -0.82957600 | 2.28086100  |
| C | 1.22318500  | -1.33342500 | 2.03685400  |
| H | 1.19986300  | -2.25384200 | 1.44296100  |
| H | 1.64658800  | -1.60298500 | 3.01723500  |
| C | 2.13513500  | -0.27981400 | 1.37855500  |
| H | 1.65233700  | 0.08492800  | 0.46532500  |
| H | 2.21417400  | 0.59301700  | 2.03829200  |
| C | 3.52968300  | -0.81901500 | 1.04885500  |
| H | 3.43621100  | -1.71498200 | 0.41660900  |
| H | 4.02489700  | -1.15150800 | 1.97093200  |
| C | 4.40789600  | 0.21514800  | 0.33495000  |
| H | 3.90182600  | 0.54873000  | -0.58337500 |

|    |             |             |             |
|----|-------------|-------------|-------------|
| H  | 4.50276800  | 1.10836300  | 0.96725500  |
| C  | 5.80272600  | -0.31311300 | -0.01739700 |
| H  | 5.70521900  | -1.20971800 | -0.64666500 |
| H  | 6.30912700  | -0.64115000 | 0.90112500  |
| C  | 6.67745100  | 0.71978400  | -0.73801900 |
| H  | 6.16794200  | 1.04805600  | -1.65451800 |
| H  | 6.77358100  | 1.61343200  | -0.10695900 |
| C  | 8.06881100  | 0.18260800  | -1.08625000 |
| H  | 8.00164000  | -0.69276500 | -1.74228700 |
| H  | 8.67203300  | 0.93803600  | -1.59890000 |
| H  | 8.61116600  | -0.12130600 | -0.18397300 |
| H  | -0.24886500 | 0.09784400  | 2.83960300  |
| C  | -2.28193800 | 3.73176200  | 1.06137600  |
| H  | -3.21333600 | 3.23567700  | 1.34755600  |
| H  | -2.43406700 | 4.33525900  | 0.16271500  |
| H  | -1.97833500 | 4.39957600  | 1.87359900  |
| C  | -1.16017600 | 2.74890700  | 0.79446800  |
| N  | -1.32873200 | 1.50765400  | 1.33331500  |
| O  | -0.11194000 | 3.04977700  | 0.21555600  |
| Rh | -1.52530600 | -0.10714600 | 0.39591700  |

**Rh-TS8**

|   |             |             |             |
|---|-------------|-------------|-------------|
| C | 3.41281000  | 0.33095400  | 0.92834000  |
| C | 3.30517100  | -1.10352600 | 0.80919400  |
| C | 2.01818100  | -1.48271500 | 1.29851700  |
| C | 1.33354100  | -0.29052900 | 1.77498800  |
| C | 2.19673800  | 0.82956700  | 1.55728900  |
| C | 4.61225200  | 1.15565200  | 0.58687000  |
| H | 5.27299500  | 1.22371400  | 1.46025400  |
| H | 4.33085500  | 2.17156600  | 0.30274600  |
| H | 5.18494700  | 0.71572100  | -0.23171100 |
| C | 4.37039700  | -2.02312600 | 0.29435900  |
| H | 5.01449100  | -2.34999800 | 1.11886800  |
| H | 5.00455700  | -1.52905900 | -0.44463800 |
| H | 3.94617300  | -2.91859500 | -0.16552500 |
| C | 1.47504600  | -2.87561800 | 1.38368500  |
| H | 1.63232800  | -3.27466800 | 2.39255900  |
| H | 1.97088100  | -3.54896800 | 0.68174800  |
| H | 0.40021600  | -2.90243500 | 1.18716500  |
| C | -0.02592300 | -0.22875300 | 2.39494300  |
| H | 0.06544400  | -0.10242200 | 3.48058200  |
| H | -0.59430300 | -1.14267200 | 2.21316400  |
| H | -0.59049300 | 0.61683200  | 1.99342800  |
| C | 1.94089700  | 2.23100800  | 2.01472300  |

|    |             |             |             |
|----|-------------|-------------|-------------|
| H  | 2.25748400  | 2.33898000  | 3.05877700  |
| H  | 0.87887000  | 2.47782500  | 1.95455600  |
| H  | 2.49966400  | 2.95759300  | 1.42151700  |
| C  | 2.20272600  | -0.90766800 | -2.47703000 |
| H  | 2.21186000  | -0.03927200 | -3.12553400 |
| H  | 3.09711300  | -1.52180500 | -2.46546800 |
| C  | 1.00150100  | -1.42444500 | -1.98601100 |
| H  | 0.97892100  | -2.40939800 | -1.52186100 |
| C  | -0.24247800 | -0.68837000 | -2.00973600 |
| C  | -1.45376800 | -1.22337100 | -1.31806600 |
| H  | -1.17870600 | -1.67827000 | -0.35889900 |
| H  | -1.78499400 | -2.05860200 | -1.96292300 |
| C  | -2.61673600 | -0.23973900 | -1.14780200 |
| H  | -2.28183500 | 0.59965200  | -0.53291800 |
| H  | -2.88382300 | 0.17112000  | -2.13089000 |
| C  | -3.84488400 | -0.90065900 | -0.51336800 |
| H  | -3.56556300 | -1.32002200 | 0.46467900  |
| H  | -4.17117000 | -1.75143100 | -1.12843200 |
| C  | -5.01310500 | 0.07432300  | -0.32863900 |
| H  | -4.68032500 | 0.92543800  | 0.28167700  |
| H  | -5.29335700 | 0.49160400  | -1.30588800 |
| C  | -6.24275700 | -0.57057800 | 0.32027200  |
| H  | -5.96189200 | -0.98819300 | 1.29800700  |
| H  | -6.57224600 | -1.42322900 | -0.29048300 |
| C  | -7.41272300 | 0.40355000  | 0.50312700  |
| H  | -7.08112300 | 1.25531500  | 1.11242600  |
| H  | -7.69167100 | 0.81923000  | -0.47452500 |
| C  | -8.63631700 | -0.24959700 | 1.15275200  |
| H  | -8.39232300 | -0.64538400 | 2.14525800  |
| H  | -9.45598600 | 0.46566800  | 1.27152800  |
| H  | -9.00679700 | -1.08378500 | 0.54623500  |
| H  | -0.41729900 | -0.02255600 | -2.84548700 |
| C  | 0.68125200  | 3.61980100  | -1.05631800 |
| H  | 0.69979000  | 4.25132600  | -0.16530700 |
| H  | 0.02025700  | 4.08536900  | -1.79469200 |
| H  | 1.67923800  | 3.53903100  | -1.49307300 |
| C  | 0.09205200  | 2.26723800  | -0.67651200 |
| N  | 0.67374300  | 1.23133300  | -1.37378700 |
| O  | -0.82598400 | 2.15518900  | 0.13471400  |
| Rh | 1.72058400  | -0.05503300 | -0.40981300 |

**Rh-9**

|   |            |             |             |
|---|------------|-------------|-------------|
| C | 3.91400900 | 0.20041300  | -0.03112200 |
| C | 3.66266900 | -1.08015000 | 0.56324300  |



|   |             |             |             |
|---|-------------|-------------|-------------|
| C | 2.72570000  | -0.88544300 | 1.63174300  |
| C | 2.44459000  | 0.54566000  | 1.74310600  |
| C | 3.18739100  | 1.21498600  | 0.72888100  |
| C | 4.83739800  | 0.48401000  | -1.17194400 |
| H | 5.82032100  | 0.78243000  | -0.78723200 |
| H | 4.46417600  | 1.30101700  | -1.79372100 |
| H | 4.98069800  | -0.39394600 | -1.80432000 |
| C | 4.27538100  | -2.38847400 | 0.16309500  |
| H | 5.14124000  | -2.60585200 | 0.79875200  |
| H | 4.62264500  | -2.37426000 | -0.87172100 |
| H | 3.56909900  | -3.21467600 | 0.27498700  |
| C | 2.19616200  | -1.93932300 | 2.54857000  |
| H | 2.81359200  | -1.98001000 | 3.45506800  |
| H | 2.21854200  | -2.92765200 | 2.08584700  |
| H | 1.17135900  | -1.72221200 | 2.85753100  |
| C | 1.60211800  | 1.19814300  | 2.79133100  |
| H | 2.24029100  | 1.51137800  | 3.62721000  |
| H | 0.85001300  | 0.51171600  | 3.18498100  |
| H | 1.09126100  | 2.07042800  | 2.38427100  |
| C | 3.22569800  | 2.69020600  | 0.51072000  |
| H | 3.72875200  | 3.17489100  | 1.35580300  |
| H | 2.20749700  | 3.08906500  | 0.45541400  |
| H | 3.76416900  | 2.95373800  | -0.40077400 |
| C | 1.70872200  | -1.39493700 | -2.22137600 |
| H | 1.86416200  | -0.56822100 | -2.91133500 |
| H | 2.45149300  | -2.18643100 | -2.23950500 |
| C | 0.51477100  | -1.56736500 | -1.56897900 |
| H | 0.30762000  | -2.50593500 | -1.05855400 |
| C | -0.59829400 | -0.50521900 | -1.59359300 |
| C | -1.87964700 | -1.09779000 | -0.97599700 |
| H | -1.61982500 | -1.49672300 | 0.01427200  |
| H | -2.16556300 | -1.95667700 | -1.59832300 |
| C | -3.07324000 | -0.15148900 | -0.84098400 |
| H | -2.81128500 | 0.67957200  | -0.17447900 |
| H | -3.31393800 | 0.28961100  | -1.81689000 |
| C | -4.31635000 | -0.85731000 | -0.28456300 |
| H | -4.07212700 | -1.31136700 | 0.68621900  |
| H | -4.59161200 | -1.68736900 | -0.94979900 |
| C | -5.51519900 | 0.08347800  | -0.11923700 |
| H | -5.23672600 | 0.91285700  | 0.54662800  |
| H | -5.75518300 | 0.53951500  | -1.09017700 |
| C | -6.76122100 | -0.61627900 | 0.43492200  |
| H | -6.52025400 | -1.07403900 | 1.40505200  |
| H | -7.03901100 | -1.44539500 | -0.23126400 |

|    |              |             |             |
|----|--------------|-------------|-------------|
| C  | -7.96140100  | 0.32328500  | 0.60215400  |
| H  | -7.68161500  | 1.15128000  | 1.26770900  |
| H  | -8.20000400  | 0.77984400  | -0.36801600 |
| C  | -9.20081200  | -0.38609000 | 1.15581900  |
| H  | -8.99821000  | -0.82403100 | 2.13983200  |
| H  | -10.04208300 | 0.30517000  | 1.26546000  |
| H  | -9.52007400  | -1.19767700 | 0.49222700  |
| H  | -0.79884400  | -0.16533800 | -2.61956600 |
| C  | -1.29628200  | 2.48287000  | -1.65969000 |
| H  | -2.21164400  | 2.81711000  | -1.16567200 |
| H  | -1.56150900  | 1.82930000  | -2.48959700 |
| H  | -0.79287800  | 3.37312400  | -2.04649500 |
| C  | -0.37202400  | 1.86220100  | -0.62755200 |
| N  | 0.04124600   | 0.53615200  | -0.77856500 |
| O  | 0.08062800   | 2.54425700  | 0.28493600  |
| Rh | 1.75046300   | -0.21852600 | -0.20845900 |

**Rh-TS8'**

|   |             |             |             |
|---|-------------|-------------|-------------|
| C | -2.39667700 | 1.88376000  | -0.05411100 |
| C | -1.02734100 | 2.14540000  | -0.40210000 |
| C | -0.19660600 | 1.59689600  | 0.63206400  |
| C | -1.05513100 | 0.98856100  | 1.62892100  |
| C | -2.42063200 | 1.17479300  | 1.21074200  |
| C | -3.60029100 | 2.33074300  | -0.82226100 |
| H | -3.91280500 | 3.32248800  | -0.47334900 |
| H | -4.44418700 | 1.65203800  | -0.68108900 |
| H | -3.39275600 | 2.40995900  | -1.89161900 |
| C | -0.54741600 | 2.92212600  | -1.59098000 |
| H | -0.47492200 | 3.98732700  | -1.34279400 |
| H | -1.22971900 | 2.82959800  | -2.43931200 |
| H | 0.44297600  | 2.59208000  | -1.91213000 |
| C | 1.28611300  | 1.76222400  | 0.73088700  |
| H | 1.50733400  | 2.75557700  | 1.14056700  |
| H | 1.77147900  | 1.69356800  | -0.24394800 |
| H | 1.73807200  | 1.02233300  | 1.39166400  |
| C | -0.62975400 | 0.32353000  | 2.89888100  |
| H | -0.79553400 | 1.00357100  | 3.74333200  |
| H | 0.42844900  | 0.05884800  | 2.87957200  |
| H | -1.20774300 | -0.58858700 | 3.06835100  |
| C | -3.62980400 | 0.82094600  | 2.01731300  |
| H | -3.82569100 | 1.61303500  | 2.74965500  |
| H | -3.48162700 | -0.11205500 | 2.56559800  |
| H | -4.51983300 | 0.72064100  | 1.39258500  |
| C | -2.30694900 | -1.26743900 | -2.12161200 |

|    |             |             |             |
|----|-------------|-------------|-------------|
| H  | -2.43143200 | -2.34102500 | -2.11684600 |
| H  | -3.19442000 | -0.69760700 | -2.38281400 |
| C  | -1.00682500 | -0.69846000 | -2.38186200 |
| H  | -0.95086700 | 0.23076700  | -2.94687300 |
| C  | 0.14882400  | -1.26110500 | -1.85242000 |
| C  | 1.53313700  | -0.73699700 | -2.07579700 |
| H  | 1.50957100  | 0.34646000  | -2.24966400 |
| H  | 1.91105300  | -1.18096900 | -3.01024500 |
| C  | 2.49480000  | -1.09344400 | -0.93108200 |
| H  | 2.04133200  | -0.79805000 | 0.02244400  |
| H  | 2.60424900  | -2.18459100 | -0.88527400 |
| C  | 3.87255500  | -0.44156900 | -1.07598800 |
| H  | 3.75512800  | 0.64885300  | -1.16508700 |
| H  | 4.33612300  | -0.77106000 | -2.01568400 |
| C  | 4.80833900  | -0.75311400 | 0.09715000  |
| H  | 4.33469000  | -0.42581700 | 1.03484500  |
| H  | 4.93133700  | -1.84132600 | 0.18438900  |
| C  | 6.18492700  | -0.09204600 | -0.03280000 |
| H  | 6.05916000  | 0.99661200  | -0.12474800 |
| H  | 6.65922800  | -0.42231300 | -0.96755300 |
| C  | 7.11820500  | -0.39680000 | 1.14505900  |
| H  | 6.64074900  | -0.06847600 | 2.07861200  |
| H  | 7.24335100  | -1.48428900 | 1.23362100  |
| C  | 8.48995100  | 0.27004600  | 1.00596200  |
| H  | 8.39507900  | 1.36034100  | 0.94710600  |
| H  | 9.13582100  | 0.03710800  | 1.85797800  |
| H  | 9.00173300  | -0.06680100 | 0.09752400  |
| H  | 0.06914500  | -2.24220000 | -1.39082500 |
| C  | -4.32836900 | -2.43601400 | 0.44792000  |
| H  | -4.35835900 | -3.23396300 | -0.30039700 |
| H  | -4.72838800 | -1.52772400 | -0.01485700 |
| H  | -4.94501400 | -2.71656800 | 1.30314800  |
| C  | -2.91043900 | -2.20830100 | 0.92298200  |
| N  | -1.95479400 | -1.88441200 | -0.01468500 |
| O  | -2.54297600 | -2.35402400 | 2.08839200  |
| Rh | -1.37509100 | -0.07904700 | -0.26936500 |

**Rh-9'**

|   |             |             |             |
|---|-------------|-------------|-------------|
| C | -1.27192500 | -1.70577000 | 1.37304800  |
| C | 0.01899600  | -1.60457900 | 0.74634200  |
| C | -0.18183800 | -1.65675800 | -0.66508600 |
| C | -1.60598100 | -1.85062800 | -0.92591300 |
| C | -2.27707100 | -1.90531800 | 0.33267900  |
| C | -1.53110100 | -1.73919200 | 2.84422200  |

|   |             |             |             |
|---|-------------|-------------|-------------|
| H | -1.50219300 | -2.77744100 | 3.19883400  |
| H | -2.51564900 | -1.33448600 | 3.08763600  |
| H | -0.77710300 | -1.17775200 | 3.39953300  |
| C | 1.32615200  | -1.54666800 | 1.47524700  |
| H | 1.61583400  | -2.55771500 | 1.78476100  |
| H | 1.25900500  | -0.93786800 | 2.37974700  |
| H | 2.12706700  | -1.14595600 | 0.85538300  |
| C | 0.86157200  | -1.64915500 | -1.73656700 |
| H | 0.86883000  | -2.62337500 | -2.23957100 |
| H | 1.86043400  | -1.46848000 | -1.34004900 |
| H | 0.64726700  | -0.89402300 | -2.49833500 |
| C | -2.21812400 | -2.06556200 | -2.27069800 |
| H | -2.31937400 | -3.14241000 | -2.45675800 |
| H | -1.59497300 | -1.64645600 | -3.06332000 |
| H | -3.20498300 | -1.60485800 | -2.32087100 |
| C | -3.72219400 | -2.20914800 | 0.55515800  |
| H | -3.86808600 | -3.29629200 | 0.52789200  |
| H | -4.33824800 | -1.75227000 | -0.21970100 |
| H | -4.06301100 | -1.85177100 | 1.52882200  |
| C | -2.35455300 | 2.62192900  | 0.39414000  |
| H | -2.21466100 | 3.45463000  | -0.30842400 |
| H | -3.07533300 | 2.94234300  | 1.15548800  |
| C | -1.04225300 | 2.20579800  | 1.05312500  |
| H | -1.01815600 | 2.07991100  | 2.13450300  |
| C | 0.11374900  | 2.13646200  | 0.32677800  |
| C | 1.49444300  | 1.96116700  | 0.89125200  |
| H | 1.46452700  | 1.31621700  | 1.77673900  |
| H | 1.81797300  | 2.94900000  | 1.25256800  |
| C | 2.51525500  | 1.45138300  | -0.13293600 |
| H | 2.13399300  | 0.53170700  | -0.59011000 |
| H | 2.59723900  | 2.17887800  | -0.95135200 |
| C | 3.90109700  | 1.19715900  | 0.46719700  |
| H | 3.81066100  | 0.51248200  | 1.32311700  |
| H | 4.29831400  | 2.13606500  | 0.87541500  |
| C | 4.89399400  | 0.61464400  | -0.54488700 |
| H | 4.49036500  | -0.32641600 | -0.94922900 |
| H | 4.98316800  | 1.29725700  | -1.40120200 |
| C | 6.28311000  | 0.35482300  | 0.04803000  |
| H | 6.19105000  | -0.32445500 | 0.90781800  |
| H | 6.68797800  | 1.29537900  | 0.44687000  |
| C | 7.27373500  | -0.23638600 | -0.96205600 |
| H | 6.86596400  | -1.17561700 | -1.36078200 |
| H | 7.36397200  | 0.44441500  | -1.81916300 |
| C | 8.65818600  | -0.49121700 | -0.35865300 |

|    |             |             |             |
|----|-------------|-------------|-------------|
| H  | 8.60010800  | -1.19339000 | 0.48077900  |
| H  | 9.34526000  | -0.91239800 | -1.09878600 |
| H  | 9.10128100  | 0.43771500  | 0.01726400  |
| H  | 0.06514500  | 2.42063000  | -0.72749700 |
| C  | -4.90052500 | 2.45655700  | -0.95648400 |
| H  | -4.38795900 | 3.31224700  | -1.40823100 |
| H  | -5.21495100 | 2.75515100  | 0.04968700  |
| H  | -5.78155000 | 2.20807800  | -1.54687700 |
| C  | -3.99866200 | 1.23906400  | -0.89951300 |
| N  | -2.76446900 | 1.38897200  | -0.27077300 |
| O  | -4.32238300 | 0.16604400  | -1.39398500 |
| Rh | -1.37345000 | 0.07441200  | 0.12973700  |

**TS-CO<sub>2</sub>**

|   |             |             |             |
|---|-------------|-------------|-------------|
| C | 2.57359100  | -0.25960600 | -0.00004800 |
| H | 2.82203600  | -0.82178400 | 0.90199500  |
| H | 3.10279700  | 0.69441500  | -0.00023200 |
| H | 2.82180400  | -0.82176000 | -0.90218200 |
| C | 1.00773300  | -0.15189500 | 0.00003900  |
| O | 0.24202200  | -1.12515900 | 0.00015400  |
| N | 0.87850000  | 1.12930900  | -0.00008700 |
| O | -1.06273000 | 1.16397800  | 0.00015500  |
| C | -1.64467700 | 0.11306800  | -0.00007000 |
| O | -2.49379500 | -0.68449900 | -0.00012100 |
